# Supplementary material
Source: MDPI journal article supplement (https://www.mdpi.com/2072-4292/13/4/736)
Supplement: s1 [file s1]

Longitude	Latitude	B1	B2	B3	B4	B5	B6	B7	B8	B8A	B9	B11	B12	NDVI	MNDWI	Class
-74.9740012	8.006757555	0.0919	0.0564	0.0738	0.0766	0.0936	0.0724	0.0893	0.0491	0.0798	0.1325	0.0452	0.0357	-0.218774861	0.240336134	shadows
-74.96991749	8.008475932	0.065	0.0647	0.0852	0.091	0.0887	0.0607	0.067	0.0496	0.052	0.0742	0.0307	0.0244	-0.294452347	0.470232959	shadows
-74.97000823	8.008475938	0.0656	0.0579	0.075	0.0796	0.0892	0.0604	0.0673	0.0459	0.0516	0.0718	0.0309	0.0247	-0.268525896	0.416430595	shadows
-74.92964344	7.906165677	0.0293	0.025	0.0275	0.0254	0.0398	0.0611	0.0689	0.0405	0.0765	0.1351	0.0606	0.0339	0.229135053	-0.375709421	shadows
-74.92964343	7.906256133	0.03	0.0251	0.0318	0.0246	0.0536	0.1027	0.1285	0.0735	0.1351	0.1513	0.0877	0.0451	0.498470948	-0.467782427	shadows
-74.97744968	8.00449637	0.0424	0.0436	0.0542	0.0529	0.056	0.039	0.0449	0.0307	0.0338	0.0543	0.0206	0.016	-0.265550239	0.449197861	shadows
-74.97118789	8.009199666	0.0638	0.0595	0.0694	0.066	0.0615	0.0508	0.0584	0.0527	0.0529	0.0889	0.0465	0.0384	-0.112047178	0.197584124	shadows
-74.97118792	8.008747389	0.0747	0.0703	0.0819	0.0744	0.0727	0.0572	0.064	0.0534	0.0521	0.082	0.0388	0.0291	-0.164319249	0.357083679	shadows
-74.9740012	8.006667099	0.0852	0.0527	0.0655	0.0654	0.081	0.0616	0.0739	0.046	0.0634	0.1163	0.0379	0.0296	-0.174147217	0.266924565	shadows
-74.97744969	8.004225003	0.0481	0.0462	0.0555	0.0513	0.0518	0.0338	0.0385	0.0287	0.0295	0.0473	0.017	0.0129	-0.2825	0.531034483	shadows
-74.97418271	8.006395744	0.079	0.053	0.0629	0.0615	0.0691	0.0524	0.0619	0.0371	0.0566	0.0987	0.0352	0.0277	-0.247464503	0.282364934	shadows
-74.97118792	8.008837844	0.0726	0.0671	0.0781	0.0735	0.0713	0.0563	0.0638	0.0524	0.0517	0.0834	0.0393	0.0306	-0.167593328	0.330494037	shadows
-74.97000825	8.008295027	0.061	0.054	0.0664	0.0641	0.0761	0.0508	0.057	0.0439	0.0456	0.079	0.0289	0.0223	-0.187037037	0.393494229	shadows
-74.97735895	8.004224998	0.0477	0.046	0.0536	0.0495	0.0516	0.0334	0.0392	0.0283	0.0274	0.0459	0.0173	0.0138	-0.272493573	0.511988717	shadows
-74.9699175	8.008295021	0.0596	0.0612	0.0706	0.0717	0.0781	0.0506	0.0568	0.0481	0.0485	0.0825	0.0292	0.0224	-0.196994992	0.414829659	shadows
-74.97018974	8.008295041	0.0637	0.0554	0.0692	0.0686	0.0919	0.0606	0.0661	0.0412	0.0501	0.0721	0.0293	0.0231	-0.249544627	0.405076142	shadows
-74.97409195	8.006667105	0.0891	0.0543	0.0689	0.065	0.0746	0.0631	0.0786	0.0506	0.0753	0.1264	0.0452	0.0369	-0.124567474	0.207712533	shadows
-74.97127867	8.008747395	0.0794	0.0686	0.0761	0.0714	0.0681	0.0543	0.061	0.0541	0.0543	0.0918	0.0421	0.0343	-0.137848606	0.287648054	shadows
-74.9772682	8.004315449	0.0454	0.0467	0.0521	0.0495	0.0501	0.0339	0.0399	0.0282	0.0302	0.0454	0.0186	0.014	-0.274131274	0.473833098	shadows
-74.97000824	8.008385483	0.0633	0.055	0.0711	0.07	0.081	0.0554	0.0623	0.0436	0.0474	0.0754	0.0301	0.0235	-0.232394366	0.40513834	shadows
-74.97118791	8.0089283	0.0704	0.0664	0.0752	0.0727	0.07	0.0554	0.0636	0.053	0.0514	0.0848	0.0398	0.0322	-0.156722355	0.307826087	shadows
-74.97699595	8.004496345	0.0418	0.0465	0.059	0.055	0.053	0.034	0.0402	0.0303	0.0306	0.0442	0.0192	0.0146	-0.289566237	0.508951407	shadows
-74.97409195	8.00657665	0.0825	0.0525	0.0665	0.0635	0.0664	0.051	0.0604	0.0454	0.0528	0.1106	0.034	0.0278	-0.16620753	0.323383085	shadows
-74.92964341	7.906346589	0.0308	0.0279	0.0366	0.0285	0.0675	0.1444	0.1881	0.1177	0.1938	0.1676	0.1148	0.0563	0.610123119	-0.51651255	shadows
-74.97717746	8.004224988	0.0468	0.0452	0.0486	0.047	0.0479	0.0332	0.0401	0.0278	0.0271	0.0431	0.0182	0.0135	-0.256684492	0.45508982	shadows
-74.97418271	8.0064862	0.0828	0.0502	0.0626	0.0634	0.073	0.0609	0.0705	0.039	0.0617	0.1099	0.0426	0.0328	-0.23828125	0.190114068	shadows
-74.97091562	8.009651925	0.0583	0.0726	0.0916	0.0908	0.0856	0.0704	0.0805	0.0599	0.0723	0.1149	0.052	0.0405	-0.205043132	0.275766017	shadows
-74.97409196	8.006395739	0.0763	0.0513	0.0601	0.0588	0.0631	0.0444	0.0519	0.0369	0.0447	0.0909	0.0289	0.0214	-0.228840125	0.350561798	shadows
-74.96991749	8.008385476	0.0623	0.0595	0.0757	0.078	0.0813	0.0552	0.0622	0.0462	0.0482	0.0783	0.0297	0.0232	-0.256038647	0.436432638	shadows
-74.97717743	8.004677266	0.0396	0.0444	0.053	0.0506	0.0615	0.047	0.0533	0.0304	0.0414	0.0556	0.0269	0.0199	-0.249382716	0.326658323	shadows
-74.97418272	8.006305289	0.0752	0.0522	0.0641	0.0591	0.0685	0.048	0.0574	0.0364	0.0482	0.0876	0.0301	0.0229	-0.237696335	0.360934183	shadows
-74.97699596	8.004315434	0.0444	0.0423	0.0508	0.0485	0.0505	0.0319	0.039	0.0265	0.029	0.0406	0.0187	0.0143	-0.293333333	0.461870504	shadows
-74.97409194	8.006757561	0.0956	0.0568	0.0703	0.0722	0.0829	0.0752	0.0968	0.0504	0.0978	0.1421	0.0565	0.0461	-0.177814029	0.108832808	shadows
-74.97717746	8.004134533	0.0486	0.0445	0.0493	0.047	0.0473	0.0323	0.0388	0.0275	0.0275	0.0424	0.0178	0.0134	-0.261744966	0.469448584	shadows
-74.97100637	8.009561476	0.0559	0.0694	0.0863	0.0853	0.0771	0.0652	0.0756	0.0617	0.0715	0.1102	0.0514	0.039	-0.160544218	0.253449528	shadows
-74.97681445	8.004677246	0.0426	0.0522	0.0634	0.0593	0.0564	0.0394	0.0443	0.033	0.0357	0.0496	0.0204	0.0158	-0.284940412	0.513126492	shadows
-74.97009899	8.008385489	0.0643	0.0543	0.0662	0.0658	0.0808	0.0556	0.0625	0.0405	0.0466	0.0725	0.0305	0.0238	-0.238005644	0.36918304	shadows
-74.97708669	8.00449635	0.0419	0.0448	0.0566	0.0519	0.0518	0.0349	0.0409	0.0298	0.0314	0.0462	0.0195	0.0148	-0.270501836	0.487516426	shadows
-74.97009898	8.008475945	0.0662	0.0557	0.073	0.0782	0.0897	0.0601	0.0676	0.0441	0.0512	0.0694	0.0311	0.0251	-0.278822567	0.402497598	shadows
-74.97409197	8.006305283	0.0731	0.0494	0.0608	0.0572	0.063	0.0422	0.0514	0.0348	0.0414	0.081	0.0262	0.019	-0.243478261	0.397701149	shadows
-74.97091562	8.009561469	0.059	0.0731	0.094	0.0927	0.0875	0.0671	0.0756	0.0599	0.0656	0.1048	0.0465	0.0373	-0.214941022	0.338078292	shadows
-74.97744969	8.004315459	0.0461	0.045	0.0537	0.0498	0.0535	0.036	0.0417	0.0289	0.0321	0.0486	0.0181	0.0138	-0.265565438	0.495821727	shadows
-74.97009899	8.008295034	0.0624	0.054	0.0668	0.0636	0.0741	0.0511	0.0572	0.0412	0.0428	0.0755	0.0287	0.0222	-0.213740458	0.39895288	shadows
-74.9772682	8.004224993	0.0473	0.045	0.0516	0.047	0.0497	0.0333	0.0396	0.0272	0.0272	0.0445	0.0177	0.0136	-0.266846361	0.489177489	shadows
-74.97391048	8.006214816	0.0672	0.0542	0.0703	0.0662	0.0596	0.0419	0.0484	0.0365	0.0378	0.0605	0.0217	0.015	-0.289191821	0.52826087	shadows
-74.97400122	8.006395733	0.0735	0.0525	0.0634	0.0605	0.0658	0.046	0.0506	0.0374	0.0422	0.083	0.0264	0.0188	-0.235955056	0.412026726	shadows
-74.97699595	8.004405889	0.0428	0.0445	0.0542	0.0517	0.0527	0.0324	0.0396	0.0279	0.0304	0.0409	0.0191	0.0144	-0.298994975	0.478854025	shadows
-74.9774497	8.004134548	0.0501	0.0471	0.0563	0.0531	0.0545	0.0349	0.0402	0.0304	0.0303	0.0459	0.0172	0.0133	-0.271856287	0.531972789	shadows
-74.97100636	8.009651931	0.0549	0.0731	0.094	0.0856	0.0767	0.0718	0.0861	0.0546	0.0818	0.1215	0.0589	0.0427	-0.221112696	0.229561805	shadows
-74.97690521	8.004315429	0.0458	0.0433	0.0501	0.0477	0.0499	0.032	0.0385	0.027	0.0293	0.0407	0.0181	0.0141	-0.277108434	0.469208211	shadows
-74.9741827	8.006576655	0.0866	0.0509	0.0684	0.0684	0.077	0.0694	0.0791	0.0508	0.0669	0.121	0.05	0.0379	-0.147651007	0.155405405	shadows
-74.97109712	8.009561482	0.0557	0.0655	0.08	0.077	0.0685	0.0681	0.0799	0.0531	0.0764	0.1119	0.0568	0.0403	-0.183704842	0.169590643	shadows
-74.92964346	7.906075222	0.0289	0.0258	0.0277	0.0265	0.0371	0.0442	0.0536	0.034	0.0531	0.1258	0.0447	0.0266	0.123966942	-0.23480663	shadows
-74.97391048	8.006305272	0.069	0.0515	0.0691	0.0662	0.064	0.0447	0.0488	0.0377	0.0388	0.0678	0.0228	0.0156	-0.274302214	0.503808487	shadows
-74.97109711	8.009651937	0.0542	0.0644	0.0761	0.0705	0.0672	0.0764	0.0919	0.0572	0.0902	0.1215	0.0658	0.0443	-0.104150352	0.072586328	shadows
-74.9711879	8.009018755	0.0682	0.0651	0.0752	0.0735	0.0671	0.0527	0.0602	0.0519	0.0517	0.0862	0.0421	0.035	-0.172248804	0.282182438	shadows
-74.97744967	8.004586825	0.0408	0.0474	0.0572	0.0558	0.0568	0.0397	0.0449	0.0316	0.0329	0.0585	0.022	0.0172	-0.276887872	0.444444444	shadows
-74.97400121	8.006486188	0.076	0.0533	0.063	0.0612	0.0671	0.0483	0.0546	0.039	0.0446	0.0916	0.0285	0.0211	-0.221556886	0.37704918	shadows
-74.97708669	8.004586805	0.0408	0.0483	0.0549	0.0519	0.0527	0.0366	0.0424	0.032	0.0314	0.0497	0.0194	0.0151	-0.237187128	0.477792732	shadows
-74.97717745	8.004315444	0.0451	0.0435	0.0512	0.0501	0.0486	0.0336	0.0397	0.0281	0.0297	0.0438	0.0192	0.014	-0.281329923	0.454545455	shadows
-74.97735894	8.004315454	0.0457	0.0462	0.053	0.0495	0.0516	0.0342	0.0401	0.029	0.0308	0.047	0.018	0.014	-0.261146497	0.492957746	shadows
-74.97409196	8.006486194	0.0794	0.0516	0.0601	0.0605	0.0647	0.0477	0.0561	0.04	0.0487	0.1007	0.0314	0.0246	-0.2039801	0.313661202	shadows
-74.97127868	8.00865694	0.0801	0.0725	0.0813	0.0763	0.0756	0.0581	0.0658	0.0532	0.0555	0.0889	0.0408	0.0333	-0.178378378	0.331695332	shadows
-74.92964353	7.905622942	0.0274	0.0277	0.0329	0.0374	0.0373	0.0264	0.0314	0.0304	0.026	0.0796	0.0265	0.0153	-0.103244838	0.107744108	shadows
-74.97735895	8.004134543	0.0496	0.0467	0.0542	0.0513	0.0527	0.0343	0.0392	0.0286	0.0293	0.0447	0.0172	0.014	-0.284105131	0.518207283	shadows
-74.9711879	8.009109211	0.066	0.0619	0.0756	0.0739	0.0642	0.0501	0.0568	0.0514	0.052	0.0875	0.0445	0.0379	-0.179569034	0.258950874	shadows
-74.97708668	8.004677261	0.0397	0.0455	0.0545	0.0517	0.062	0.0438	0.0488	0.0326	0.0387	0.0532	0.024	0.0179	-0.226571767	0.388535032	shadows
-74.97018973	8.008385496	0.0653	0.0581	0.073	0.0766	0.1027	0.0673	0.0732	0.0432	0.0557	0.0695	0.031	0.0246	-0.278797997	0.403846154	shadows
-74.97118793	8.008656933	0.0758	0.0748	0.0873	0.0822	0.0779	0.0578	0.0652	0.0575	0.0534	0.0799	0.0373	0.0296	-0.176807445	0.401284109	shadows
-74.97127866	8.008837851	0.0767	0.0678	0.0733	0.0709	0.0659	0.0537	0.0615	0.0548	0.0568	0.0927	0.0462	0.0379	-0.128082737	0.226778243	shadows
-74.97091561	8.00974238	0.0576	0.0725	0.0887	0.0875	0.0902	0.0968	0.1145	0.0623	0.114	0.125	0.0792	0.056	-0.168224299	0.056581298	shadows
-74.97744968	8.004405914	0.0441	0.0447	0.0542	0.0507	0.0552	0.0383	0.0449	0.0294	0.0347	0.05	0.0191	0.0148	-0.265917603	0.478854025	shadows
-74.97409198	8.006214828	0.07	0.0523	0.0627	0.0582	0.0629	0.04	0.051	0.0361	0.0382	0.0711	0.0236	0.0167	-0.234358431	0.453070684	shadows
-74.97726819	8.004405904	0.0436	0.0443	0.0524	0.0495	0.0505	0.0345	0.0402	0.0288	0.0333	0.0464	0.0195	0.0144	-0.264367816	0.457579972	shadows
-74.97400121	8.006576644	0.0785	0.0568	0.0646	0.0628	0.0685	0.0507	0.0586	0.0411	0.047	0.1002	0.0306	0.0235	-0.208854668	0.357142857	shadows
-74.9770867	8.004405894	0.043	0.0448	0.0551	0.0517	0.051	0.0332	0.0395	0.0285	0.0314	0.0427	0.0196	0.0145	-0.289276808	0.47523427	shadows
-74.97391047	8.006395727	0.0708	0.0526	0.0677	0.0632	0.0685	0.0476	0.0493	0.0396	0.0398	0.0752	0.0239	0.0162	-0.229571984	0.478165939	shadows
-74.97717744	8.00458681	0.0408	0.0464	0.0514	0.0493	0.0521	0.0376	0.044	0.0287	0.0321	0.0519	0.0195	0.0155	-0.264102564	0.449929478	shadows
-74.92964355	7.905532486	0.0273	0.027	0.0302	0.0378	0.0389	0.0266	0.032	0.0285	0.028	0.0764	0.0255	0.0156	-0.140271493	0.08438061	shadows
-74.97391045	8.006757549	0.0882	0.0582	0.0725	0.0783	0.1044	0.0697	0.0818	0.0449	0.0618	0.1228	0.034	0.0253	-0.271103896	0.361502347	shadows
-74.9296434	7.906437045	0.0316	0.0292	0.044	0.0328	0.0742	0.1658	0.2053	0.1438	0.2245	0.1839	0.1247	0.0631	0.628539071	-0.47836396	shadows
-74.97690521	8.004405884	0.0442	0.0439	0.0508	0.0497	0.0527	0.0333	0.0395	0.0274	0.0309	0.041	0.0184	0.0142	-0.28923476	0.468208092	shadows
-74.97681447	8.004315424	0.0472	0.0429	0.0505	0.047	0.0493	0.0321	0.038	0.0275	0.0296	0.0409	0.0174	0.014	-0.261744966	0.487481591	shadows
-74.97391046	8.006576638	0.0744	0.0584	0.0758	0.0725	0.0706	0.0505	0.0568	0.0443	0.0412	0.0898	0.0273	0.0193	-0.241438356	0.470417071	shadows
-74.97681446	8.004405879	0.0456	0.0441	0.0509	0.0488	0.0528	0.0342	0.0394	0.0279	0.0315	0.0412	0.0178	0.014	-0.272490222	0.481804949	shadows
-74.97018973	8.008475952	0.0668	0.0626	0.0867	0.0918	0.1066	0.0696	0.075	0.0487	0.0569	0.067	0.0318	0.0255	-0.306761566	0.463291139	shadows
-74.9770867	8.004315439	0.0447	0.0423	0.0525	0.0501	0.0495	0.0327	0.0394	0.0272	0.0294	0.0422	0.0189	0.0142	-0.296248383	0.470588235	shadows
-74.97418269	8.006667111	0.093	0.0595	0.0708	0.0654	0.0848	0.084	0.1018	0.0582	0.1014	0.1364	0.0665	0.0531	-0.058252427	0.031318281	shadows
-74.97672371	8.00449633	0.046	0.046	0.0539	0.0537	0.0555	0.0363	0.0417	0.0305	0.0333	0.0439	0.0187	0.0139	-0.275534442	0.484848485	shadows
-74.97136941	8.008837857	0.0808	0.0659	0.075	0.0685	0.0604	0.0511	0.0592	0.0529	0.062	0.102	0.0531	0.0451	-0.128500824	0.170960187	shadows
-74.97400123	8.006214822	0.0686	0.0523	0.0641	0.0603	0.0612	0.0409	0.0497	0.0356	0.038	0.0658	0.0226	0.0158	-0.257559958	0.478662053	shadows
-74.97717745	8.004405899	0.0433	0.0445	0.0532	0.0497	0.0493	0.034	0.0394	0.0282	0.0324	0.0445	0.0202	0.0146	-0.275994865	0.449591281	shadows
-74.97391047	8.006486183	0.0726	0.056	0.0727	0.0713	0.0695	0.049	0.053	0.0417	0.0405	0.0825	0.0256	0.0177	-0.261946903	0.479145473	shadows
-74.97690522	8.004224973	0.0474	0.0436	0.0488	0.0459	0.047	0.0307	0.0376	0.0273	0.0277	0.0404	0.0177	0.0141	-0.254098361	0.467669173	shadows
-74.97699596	8.004224978	0.046	0.0424	0.0483	0.0464	0.0483	0.0314	0.0385	0.0259	0.0277	0.0403	0.0184	0.0143	-0.283540802	0.448275862	shadows
-74.97391046	8.006667094	0.0813	0.0572	0.0711	0.0662	0.0875	0.0601	0.0693	0.0444	0.0515	0.1063	0.0306	0.0223	-0.197106691	0.398230088	shadows
-74.97708671	8.004224983	0.0464	0.041	0.05	0.0472	0.0481	0.0323	0.0393	0.0268	0.0274	0.0417	0.0183	0.0139	-0.275675676	0.464128843	shadows
-74.97681447	8.004224968	0.0488	0.0448	0.0505	0.0473	0.0458	0.03	0.0367	0.0282	0.0278	0.0405	0.0171	0.014	-0.252980132	0.49408284	shadows
-74.97735894	8.004405909	0.0438	0.0443	0.0528	0.0499	0.0517	0.035	0.0411	0.0294	0.0342	0.0482	0.0188	0.0142	-0.25851198	0.474860335	shadows
-74.92946201	7.906075191	0.0283	0.0242	0.0273	0.0246	0.0351	0.0479	0.0558	0.0348	0.0605	0.1238	0.0454	0.0241	0.171717172	-0.248968363	shadows
-74.97726821	8.004134538	0.0491	0.0444	0.053	0.049	0.05	0.0333	0.039	0.0265	0.0284	0.0436	0.0175	0.0137	-0.298013245	0.503546099	shadows
-74.97708672	8.004134528	0.0481	0.044	0.0498	0.047	0.0466	0.0317	0.038	0.0272	0.0276	0.0412	0.0179	0.0138	-0.266846361	0.471196455	shadows
-74.95196031	7.917023547	0.0277	0.0294	0.0377	0.0381	0.0617	0.0952	0.1122	0.0934	0.1258	0.1042	0.0946	0.052	0.420532319	-0.430083144	shadows
-74.97672373	8.004224963	0.0502	0.046	0.0533	0.0502	0.0482	0.0315	0.0367	0.0299	0.0274	0.0406	0.0178	0.0131	-0.253433208	0.499296765	shadows
-74.97418272	8.006214833	0.0714	0.057	0.0694	0.0644	0.068	0.0436	0.0529	0.0406	0.0398	0.0764	0.0249	0.0182	-0.226666667	0.471898197	shadows
-74.97136942	8.008656946	0.0843	0.0694	0.0797	0.0742	0.0733	0.0585	0.0664	0.0542	0.0576	0.0979	0.0443	0.037	-0.15576324	0.285483871	shadows
-74.97672371	8.004586785	0.045	0.0492	0.0602	0.0609	0.0574	0.0381	0.0441	0.0316	0.0343	0.0465	0.0196	0.0142	-0.316756757	0.50877193	shadows
-74.9713694	8.008928313	0.0776	0.0571	0.0628	0.0587	0.0574	0.0508	0.0604	0.0517	0.0674	0.1024	0.0609	0.0507	-0.063405797	0.015359741	shadows
-74.97127864	8.009199673	0.0659	0.0496	0.0547	0.0469	0.0629	0.0596	0.0655	0.0473	0.0623	0.0963	0.059	0.0442	0.004246285	-0.037818821	shadows
-74.97717744	8.004496355	0.042	0.044	0.0533	0.0501	0.0507	0.0358	0.0417	0.0286	0.0322	0.0482	0.0198	0.015	-0.273189327	0.458276334	shadows
-74.92937127	7.906165631	0.0282	0.028	0.0302	0.0248	0.0414	0.0693	0.0819	0.0611	0.0934	0.1293	0.0613	0.0305	0.4225844	-0.33989071	shadows
-74.92946199	7.906165647	0.0285	0.0258	0.0291	0.0252	0.0393	0.0659	0.0754	0.0585	0.0885	0.1312	0.06	0.0301	0.397849462	-0.346801347	shadows
-74.97672372	8.004405874	0.047	0.046	0.0531	0.0501	0.0536	0.0345	0.0393	0.03	0.0324	0.0414	0.0179	0.0136	-0.25093633	0.495774648	shadows
-74.97690519	8.004677251	0.0412	0.0504	0.0592	0.0559	0.0594	0.04	0.0443	0.0323	0.0359	0.0502	0.0207	0.0158	-0.267573696	0.481852315	shadows
-74.97136942	8.008747402	0.084	0.067	0.0755	0.0719	0.0635	0.0515	0.0581	0.0535	0.0566	0.1015	0.0454	0.0396	-0.146730463	0.248966088	shadows
-74.97681446	8.004496335	0.0446	0.0448	0.0562	0.0543	0.0544	0.0362	0.0407	0.03	0.032	0.044	0.0186	0.0143	-0.288256228	0.502673797	shadows
-74.92964352	7.905713398	0.0277	0.0279	0.0309	0.0331	0.0346	0.0275	0.0327	0.0331	0.0281	0.0888	0.0273	0.0162	0	0.06185567	shadows
-74.92955273	7.906075206	0.0286	0.0244	0.0265	0.0258	0.0361	0.046	0.0547	0.0334	0.0568	0.1248	0.045	0.0253	0.128378378	-0.258741259	shadows
-74.97400122	8.006305277	0.0711	0.0521	0.0639	0.0605	0.0635	0.0434	0.0501	0.0354	0.0401	0.0744	0.0245	0.0173	-0.26173097	0.445701357	shadows
-74.97672372	8.004315419	0.0486	0.0468	0.0522	0.0495	0.0509	0.033	0.038	0.0293	0.0299	0.041	0.0178	0.0133	-0.256345178	0.491428571	shadows
-74.97672373	8.004134508	0.0519	0.0461	0.0546	0.0526	0.0508	0.0332	0.0377	0.0298	0.0282	0.0403	0.0173	0.0133	-0.276699029	0.518776078	shadows
-74.95214185	7.916299921	0.0261	0.026	0.0295	0.0357	0.0414	0.0573	0.0682	0.0582	0.0677	0.0827	0.0681	0.0446	0.239616613	-0.395491803	shadows
-74.9767237	8.004677241	0.044	0.0519	0.0651	0.0633	0.0578	0.0396	0.0459	0.0355	0.0366	0.049	0.0211	0.0159	-0.281376518	0.510440835	shadows
-74.9769052	8.00449634	0.0432	0.045	0.0559	0.0543	0.0537	0.0351	0.0405	0.0298	0.0313	0.0441	0.0189	0.0144	-0.291319857	0.494652406	shadows
-74.97699594	8.0045868	0.0408	0.0507	0.0585	0.056	0.0534	0.0356	0.0409	0.0339	0.0308	0.0475	0.0194	0.0148	-0.245828699	0.501925546	shadows
-74.97726818	8.004677271	0.0394	0.0442	0.0552	0.0532	0.0581	0.0477	0.0546	0.0315	0.0466	0.058	0.03	0.022	-0.256198347	0.295774648	shadows
-74.95259549	7.916209517	0.0244	0.0261	0.0271	0.0306	0.0369	0.0497	0.0612	0.0558	0.0629	0.0795	0.0634	0.042	0.291666667	-0.401104972	shadows
-74.97127866	8.008928306	0.074	0.0659	0.07	0.07	0.0637	0.0531	0.062	0.0513	0.0594	0.0936	0.0503	0.0414	-0.154163232	0.163757273	shadows
-74.97681445	8.00458679	0.0436	0.0492	0.062	0.0598	0.056	0.0382	0.0421	0.0325	0.0326	0.0468	0.0194	0.0147	-0.295774648	0.523341523	shadows
-74.92955275	7.90598475	0.0283	0.0255	0.0275	0.0266	0.0327	0.0286	0.0373	0.034	0.0311	0.1164	0.0298	0.0187	0.122112211	-0.040139616	shadows
-74.97735893	8.004496365	0.0423	0.0437	0.0518	0.0505	0.0536	0.037	0.0425	0.0299	0.0329	0.0522	0.0192	0.0151	-0.256218905	0.45915493	shadows
-74.92955269	7.906346574	0.0304	0.0269	0.0375	0.0267	0.0602	0.122	0.1567	0.1139	0.1668	0.1625	0.1012	0.0494	0.620199147	-0.4592646	shadows
-74.93471902	7.937735584	0.0165	0.0204	0.0187	0.0201	0.0255	0.0311	0.0414	0.0393	0.0454	0.058	0.0541	0.039	0.323232323	-0.486263736	shadows
-74.97418269	8.006757566	0.0993	0.0597	0.0698	0.0689	0.0926	0.0986	0.1245	0.0528	0.1359	0.1518	0.083	0.0683	-0.132292523	-0.086387435	shadows
-74.97699597	8.004134523	0.0476	0.0432	0.0491	0.0459	0.0458	0.0311	0.0372	0.0269	0.0277	0.0401	0.018	0.0142	-0.260989011	0.463487332	shadows
-74.97681448	8.004134513	0.0505	0.0465	0.0516	0.048	0.0466	0.0315	0.0367	0.0285	0.0282	0.0402	0.0169	0.014	-0.254901961	0.506569343	shadows
-74.92937128	7.906075176	0.0279	0.0244	0.0258	0.0251	0.0363	0.0515	0.062	0.038	0.0666	0.1227	0.0475	0.0249	0.204437401	-0.296043656	shadows
-74.97726819	8.00449636	0.0422	0.0446	0.0527	0.0501	0.0521	0.0364	0.0421	0.0296	0.0325	0.0502	0.0195	0.0151	-0.257214555	0.459833795	shadows
-74.9295527	7.906256118	0.0296	0.0253	0.0332	0.0239	0.0498	0.0927	0.1144	0.085	0.1246	0.1478	0.0807	0.0407	0.561065197	-0.417032485	shadows
-74.95268622	7.916209527	0.0241	0.0273	0.0259	0.029	0.0357	0.0494	0.0601	0.0575	0.0613	0.0795	0.0629	0.0415	0.329479769	-0.416666667	shadows
-74.93471885	7.938821053	0.0144	0.017	0.0178	0.0203	0.0263	0.0322	0.0396	0.0378	0.0447	0.0616	0.0499	0.0393	0.301204819	-0.474150665	shadows
-74.92946198	7.906256103	0.0292	0.0276	0.034	0.0258	0.0461	0.0828	0.1003	0.0962	0.1141	0.1443	0.0738	0.0363	0.57704918	-0.369202226	shadows
-74.97127864	8.009109217	0.0686	0.0546	0.0599	0.0565	0.0645	0.0579	0.0629	0.0478	0.06	0.0954	0.0593	0.046	-0.083413231	0.005033557	shadows
-74.97690522	8.004134518	0.049	0.0445	0.0505	0.0451	0.0462	0.0313	0.0369	0.0274	0.0279	0.0401	0.0174	0.0141	-0.244137931	0.487481591	shadows
-74.92928054	7.906165616	0.0278	0.0268	0.032	0.0257	0.0436	0.0728	0.0885	0.078	0.0983	0.1273	0.0626	0.031	0.504339441	-0.32346723	shadows
-74.93471906	7.937464216	0.0169	0.0189	0.0179	0.0189	0.0258	0.0353	0.0457	0.0413	0.0487	0.068	0.0516	0.0351	0.372093023	-0.484892086	shadows
-74.97726818	8.004586815	0.0408	0.045	0.0528	0.0513	0.0538	0.0383	0.0439	0.0301	0.0318	0.0541	0.0195	0.0158	-0.26044226	0.460580913	shadows
-74.9519603	7.917114003	0.0273	0.0325	0.039	0.039	0.0584	0.0901	0.109	0.0979	0.116	0.1156	0.0914	0.0499	0.430241052	-0.401840491	shadows
-74.93480958	7.938821067	0.0151	0.0174	0.0177	0.0227	0.027	0.034	0.043	0.039	0.0466	0.061	0.0524	0.0405	0.264181524	-0.495007133	shadows
-74.934719	7.937826039	0.0164	0.0208	0.0189	0.0205	0.0251	0.0305	0.0409	0.0421	0.0459	0.0572	0.0552	0.0401	0.345047923	-0.489878543	shadows
-74.92955282	7.905532471	0.0271	0.0249	0.0307	0.0321	0.039	0.0339	0.041	0.034	0.0395	0.0799	0.0305	0.0183	0.028744327	0.003267974	shadows
-74.92964347	7.905984766	0.0286	0.0268	0.0285	0.0285	0.0345	0.0273	0.0384	0.0318	0.0297	0.1165	0.0288	0.0193	0.054726368	-0.005235602	shadows
-74.93471895	7.938187862	0.0159	0.0198	0.0166	0.0205	0.0265	0.0315	0.0399	0.0359	0.0451	0.0537	0.0572	0.042	0.273049645	-0.550135501	shadows
-74.92937125	7.906256087	0.0288	0.0287	0.036	0.0276	0.0467	0.0825	0.1002	0.0984	0.1131	0.1408	0.0718	0.035	0.561904762	-0.332096475	shadows
-74.92955267	7.90643703	0.0311	0.0292	0.0431	0.0333	0.0631	0.1337	0.1637	0.1306	0.1806	0.1772	0.1069	0.0536	0.593654667	-0.425333333	shadows
-74.92955272	7.906165662	0.0289	0.0255	0.0278	0.025	0.0395	0.0635	0.0721	0.048	0.0825	0.1331	0.0603	0.032	0.315068493	-0.368898978	shadows
-74.93480978	7.937554686	0.0173	0.0214	0.0195	0.0207	0.0261	0.033	0.043	0.0396	0.0459	0.0637	0.0539	0.0379	0.313432836	-0.46866485	shadows
-74.97735892	8.004677276	0.0393	0.0455	0.0572	0.0558	0.0547	0.0484	0.056	0.0306	0.0519	0.0604	0.033	0.0242	-0.291666667	0.268292683	shadows
-74.93526333	7.938187948	0.0171	0.0204	0.0194	0.0198	0.0254	0.0401	0.0506	0.0386	0.0563	0.0603	0.0501	0.0352	0.321917808	-0.441726619	shadows
-74.93480979	7.937464231	0.0174	0.0216	0.0183	0.0197	0.026	0.0344	0.0448	0.0403	0.0472	0.0681	0.0531	0.0366	0.343333333	-0.487394958	shadows
-74.97100636	8.009742387	0.054	0.0679	0.0802	0.0709	0.0822	0.1073	0.1312	0.0636	0.137	0.1328	0.0915	0.0625	-0.054275093	-0.065812464	shadows
-74.97127865	8.009018762	0.0713	0.0608	0.0708	0.0662	0.0641	0.0555	0.0624	0.0487	0.0597	0.0945	0.0548	0.0437	-0.152306353	0.127388535	shadows
-74.97699594	8.004677256	0.0398	0.0479	0.0554	0.0534	0.0625	0.0406	0.0444	0.0333	0.036	0.0508	0.021	0.0159	-0.23183391	0.45026178	shadows
-74.93471886	7.938730597	0.0149	0.0183	0.0166	0.0222	0.0271	0.031	0.0397	0.0345	0.0445	0.0588	0.0512	0.0412	0.216931217	-0.510324484	shadows
-74.9769052	8.004586795	0.0422	0.0492	0.0612	0.0579	0.0547	0.0369	0.0415	0.0332	0.0317	0.0471	0.0194	0.0147	-0.271130626	0.518610422	shadows
-74.9346282	7.938278304	0.0152	0.0172	0.0166	0.0193	0.0251	0.0286	0.037	0.0349	0.0414	0.0544	0.0531	0.0407	0.287822878	-0.523672884	shadows
-74.93544488	7.937645241	0.0179	0.0193	0.0245	0.0212	0.0321	0.0601	0.0758	0.067	0.0755	0.0776	0.0552	0.033	0.519274376	-0.385194479	shadows
-74.97118786	8.009561488	0.0555	0.0606	0.0702	0.0625	0.0599	0.071	0.0843	0.0535	0.0814	0.1137	0.0622	0.0417	-0.077586207	0.060422961	shadows
-74.97735893	8.00458682	0.0408	0.0454	0.0554	0.0544	0.0556	0.0391	0.0439	0.0305	0.0316	0.0563	0.0196	0.0161	-0.281507656	0.477333333	shadows
-74.95205116	7.915938087	0.0265	0.0259	0.0293	0.0338	0.0426	0.0572	0.0689	0.065	0.0727	0.0818	0.0682	0.0446	0.315789474	-0.398974359	shadows
-74.93526339	7.937826124	0.0178	0.0205	0.0217	0.0202	0.0295	0.0444	0.0541	0.0448	0.0564	0.0661	0.0542	0.0372	0.378461538	-0.428194993	shadows
-74.95205111	7.916390366	0.0266	0.0271	0.0294	0.037	0.0446	0.0592	0.0695	0.0626	0.0706	0.0838	0.0708	0.047	0.257028112	-0.413173653	shadows
-74.92946202	7.905984735	0.028	0.028	0.0285	0.026	0.0309	0.0299	0.0362	0.0298	0.0326	0.1163	0.0309	0.0181	0.068100358	-0.04040404	shadows
-74.95214186	7.916209465	0.0262	0.0258	0.0296	0.0345	0.0422	0.0559	0.0657	0.0578	0.066	0.0823	0.0676	0.0449	0.252437703	-0.390946502	shadows
-74.97212744	7.522634037	0.0363	0.0429	0.0491	0.0414	0.0626	0.1159	0.139	0.1328	0.145	0.2335	0.0986	0.0576	0.524684271	-0.335138795	shadows
-74.9713694	8.009018768	0.0743	0.0493	0.0537	0.0496	0.0611	0.0583	0.0647	0.0491	0.0677	0.1029	0.0675	0.0524	-0.005065856	-0.113861386	shadows
-74.97136938	8.009199679	0.0679	0.0512	0.0533	0.0498	0.0643	0.0684	0.0725	0.0541	0.0716	0.1038	0.0715	0.0501	0.041385948	-0.145833333	shadows
-74.92928053	7.906256072	0.0284	0.0286	0.0367	0.0289	0.0473	0.0823	0.1001	0.1081	0.112	0.1373	0.0698	0.0337	0.57810219	-0.310798122	shadows
-74.95205115	7.916028543	0.0265	0.0265	0.0299	0.0366	0.0438	0.0571	0.0682	0.0624	0.07	0.0822	0.0687	0.046	0.260606061	-0.393509128	shadows
-74.93544487	7.937735697	0.0176	0.0207	0.0231	0.018	0.0308	0.0577	0.0722	0.0644	0.0734	0.0756	0.0538	0.0326	0.563106796	-0.399219766	shadows
-74.95177905	7.91539532	0.0254	0.0296	0.03	0.0342	0.0415	0.06	0.07	0.0628	0.0746	0.0993	0.068	0.0458	0.294845361	-0.387755102	shadows
-74.97744967	8.004677281	0.0392	0.0474	0.0582	0.0558	0.054	0.0513	0.0595	0.0327	0.0539	0.0628	0.0352	0.0247	-0.261016949	0.246252677	shadows
-74.93535413	7.937735683	0.0178	0.0233	0.0227	0.0222	0.0303	0.0519	0.0644	0.0555	0.0657	0.0716	0.0544	0.0347	0.428571429	-0.411154345	shadows
-74.93535406	7.938187962	0.0167	0.0191	0.0168	0.0183	0.0235	0.0477	0.0638	0.05	0.0673	0.063	0.0466	0.0299	0.464128843	-0.470031546	shadows
-74.93471893	7.938278318	0.0157	0.0195	0.0183	0.0208	0.0269	0.0312	0.0404	0.0354	0.0442	0.0546	0.0564	0.0432	0.259786477	-0.510040161	shadows
-74.98653497	7.671165531	0.0388	0.0349	0.0426	0.0302	0.0625	0.1619	0.2107	0.173	0.2227	0.269	0.1067	0.0504	0.702755906	-0.429336906	shadows
-74.95250476	7.916209506	0.0248	0.0281	0.0273	0.0318	0.0382	0.0501	0.0623	0.0579	0.0645	0.0796	0.0638	0.0424	0.2909699	-0.400658617	shadows
-74.95214184	7.916390377	0.0261	0.0251	0.0289	0.0334	0.0414	0.0588	0.0705	0.0618	0.0706	0.0831	0.0688	0.0454	0.298319328	-0.40839304	shadows
-74.93480959	7.938730611	0.0157	0.0182	0.0186	0.0222	0.0275	0.0329	0.0428	0.0384	0.0461	0.0583	0.0533	0.0416	0.267326733	-0.482614743	shadows
-74.93471905	7.937554672	0.0168	0.0198	0.0181	0.0178	0.0258	0.0335	0.0438	0.0421	0.0468	0.0634	0.0523	0.0365	0.405676127	-0.485795455	shadows
-74.99922884	7.909066191	0.046	0.0403	0.0449	0.032	0.0545	0.1076	0.1343	0.1303	0.1393	0.1382	0.0935	0.0541	0.605668515	-0.351156069	shadows
-74.93535412	7.937826139	0.0176	0.0209	0.0217	0.0232	0.0295	0.0499	0.0613	0.0516	0.0639	0.0699	0.0533	0.0347	0.379679144	-0.421333333	shadows
-74.95180839	7.658679984	0.0324	0.0376	0.0431	0.0327	0.0539	0.0955	0.1147	0.11	0.1233	0.2161	0.0819	0.0486	0.541695865	-0.3104	shadows
-74.95205112	7.91629991	0.0266	0.028	0.0294	0.0362	0.0448	0.0576	0.0685	0.0594	0.0684	0.0834	0.0709	0.0469	0.242677824	-0.413758724	shadows
-74.92955281	7.905622927	0.0272	0.026	0.0314	0.0344	0.0395	0.0364	0.0443	0.0343	0.0422	0.0831	0.0329	0.0191	-0.001455604	-0.023328149	shadows
-74.95186959	7.917023537	0.0294	0.0298	0.0393	0.0438	0.0601	0.0894	0.1093	0.0851	0.1159	0.1088	0.0941	0.0528	0.320403413	-0.410794603	shadows
-74.90279139	7.896481517	0.0144	0.0269	0.0279	0.0261	0.0298	0.0532	0.0713	0.0644	0.0768	0.0974	0.0475	0.0272	0.42320442	-0.25994695	shadows
-74.9867991	7.922996192	0.0214	0.0237	0.028	0.0164	0.0359	0.0999	0.1343	0.1224	0.1399	0.144	0.0606	0.0287	0.763688761	-0.367945824	shadows
-74.92955279	7.905713383	0.0275	0.0275	0.0318	0.0335	0.0362	0.0345	0.0414	0.0311	0.0401	0.0915	0.0317	0.0188	-0.037151703	0.001574803	shadows
-74.9296435	7.905803854	0.028	0.0262	0.0289	0.0297	0.032	0.0287	0.0341	0.0339	0.0302	0.098	0.0281	0.0172	0.066037736	0.014035088	shadows
-74.93471907	7.937373761	0.0171	0.0216	0.0193	0.0205	0.0261	0.0353	0.0458	0.045	0.0486	0.0726	0.0519	0.0361	0.374045802	-0.457865169	shadows
-74.9709156	8.009832836	0.0568	0.0673	0.0822	0.0899	0.0949	0.1232	0.1484	0.077	0.1558	0.135	0.1064	0.0715	-0.077291791	-0.128313892	shadows
-74.93517256	7.938459301	0.0176	0.0203	0.0197	0.0195	0.0265	0.0398	0.0508	0.0439	0.0541	0.0578	0.0529	0.0371	0.384858044	-0.457300275	shadows
-74.93462819	7.93836876	0.015	0.0167	0.0163	0.0188	0.0258	0.0284	0.0371	0.035	0.0413	0.0554	0.0529	0.0416	0.301115242	-0.528901734	shadows
-74.90406087	7.899195486	0.012	0.0249	0.0252	0.02	0.0328	0.0595	0.0761	0.0668	0.08	0.0832	0.0577	0.0329	0.539170507	-0.392038601	shadows
-74.98970223	7.92941864	0.043	0.042	0.0532	0.0464	0.0735	0.1161	0.1434	0.1365	0.1556	0.221	0.1263	0.0701	0.492618917	-0.40724234	shadows
-74.97136939	8.009109223	0.0711	0.0482	0.0503	0.049	0.0649	0.0658	0.069	0.0488	0.068	0.1033	0.0742	0.0541	-0.00204499	-0.191967871	shadows
-74.93526335	7.938097492	0.0172	0.0208	0.0187	0.0203	0.0268	0.0396	0.049	0.0404	0.0549	0.0618	0.0511	0.0359	0.331136738	-0.464183381	shadows
-74.95186964	7.916571257	0.0285	0.0316	0.0325	0.0418	0.0493	0.0588	0.0702	0.0608	0.0727	0.0919	0.074	0.0508	0.185185185	-0.389671362	shadows
-74.93517254	7.938549756	0.0176	0.0212	0.0194	0.0193	0.0278	0.0408	0.0525	0.044	0.0553	0.0578	0.054	0.0376	0.390205371	-0.471389646	shadows
-74.92946196	7.906346559	0.0299	0.0296	0.0387	0.0277	0.0529	0.0997	0.1253	0.1167	0.1398	0.1575	0.0877	0.0426	0.61634349	-0.387658228	shadows
-74.98743418	7.923538947	0.0238	0.0226	0.0289	0.015	0.0412	0.14	0.1874	0.1532	0.1991	0.2504	0.0846	0.0403	0.821640904	-0.490748899	shadows
-74.91645649	7.608470938	0.0296	0.0318	0.0381	0.0292	0.0471	0.0925	0.1141	0.1055	0.1188	0.1272	0.083	0.0486	0.56644395	-0.37076796	shadows
-74.93517262	7.938097478	0.0175	0.019	0.017	0.0202	0.0258	0.0355	0.0427	0.0361	0.0496	0.0589	0.0528	0.0382	0.282415631	-0.512893983	shadows
-74.93517253	7.938640212	0.0177	0.021	0.0202	0.0178	0.028	0.041	0.0523	0.0457	0.0559	0.0578	0.055	0.0387	0.439370079	-0.462765957	shadows
-74.97109711	8.009742393	0.0527	0.0452	0.0552	0.0483	0.0714	0.1017	0.1261	0.0897	0.1351	0.131	0.0902	0.0601	0.3	-0.240715268	shadows
-74.93471896	7.938097407	0.016	0.0209	0.018	0.0216	0.026	0.0307	0.0404	0.0375	0.0438	0.0546	0.0571	0.0418	0.269035533	-0.520639148	shadows
-74.93462816	7.938549671	0.0146	0.0176	0.0158	0.0214	0.0252	0.0279	0.038	0.0373	0.0426	0.0574	0.0509	0.0412	0.270868825	-0.526236882	shadows
-74.93480976	7.937645142	0.0171	0.0212	0.0186	0.0206	0.0262	0.0315	0.0412	0.0407	0.0446	0.0592	0.0548	0.0393	0.327895595	-0.493188011	shadows
-74.95196024	7.917656738	0.0275	0.0231	0.0398	0.0218	0.0543	0.1312	0.1662	0.1737	0.1722	0.202	0.0922	0.0447	0.776982097	-0.396969697	shadows
-74.93462814	7.938640127	0.0144	0.0177	0.0164	0.0213	0.0248	0.0289	0.0385	0.0364	0.0432	0.0584	0.0496	0.0396	0.26169844	-0.503030303	shadows
-74.99750509	7.905176579	0.047	0.0416	0.0476	0.039	0.0629	0.1154	0.1418	0.1293	0.1472	0.1789	0.1046	0.0579	0.536541889	-0.374507227	shadows
-74.93471903	7.937645128	0.0166	0.0217	0.0183	0.0201	0.0259	0.0317	0.0419	0.0419	0.045	0.0588	0.053	0.038	0.351612903	-0.486676017	shadows
-74.97119517	7.904904225	0.0242	0.0291	0.0253	0.0258	0.0326	0.052	0.0645	0.0521	0.0683	0.1047	0.0536	0.0341	0.337612323	-0.358681876	shadows
-74.99931956	7.908794823	0.0474	0.0405	0.0431	0.0336	0.055	0.1086	0.1362	0.1307	0.1417	0.1469	0.0929	0.0524	0.590992088	-0.366176471	shadows
-74.98688983	7.922996195	0.022	0.0224	0.032	0.0156	0.0365	0.1035	0.1369	0.1478	0.1452	0.1686	0.0628	0.0293	0.809057528	-0.324894515	shadows
-74.93490051	7.937554701	0.0177	0.0223	0.0208	0.0214	0.0264	0.0325	0.0423	0.0405	0.045	0.0639	0.0556	0.0394	0.308562197	-0.455497382	shadows
-74.95186963	7.916661713	0.0287	0.0306	0.033	0.0425	0.0502	0.0594	0.0733	0.0641	0.0746	0.0952	0.0752	0.052	0.202626642	-0.390018484	shadows
-74.95196032	7.916933091	0.0276	0.0277	0.0319	0.0339	0.0583	0.085	0.1039	0.0774	0.1138	0.101	0.091	0.0536	0.39083558	-0.480878763	shadows
-74.99931956	7.908885279	0.0472	0.037	0.0428	0.0321	0.0547	0.1077	0.1349	0.1298	0.1395	0.1437	0.0921	0.052	0.603458925	-0.365455893	shadows
-74.93535415	7.937645227	0.018	0.0207	0.0227	0.021	0.0312	0.0539	0.0676	0.0601	0.0675	0.0733	0.0555	0.0348	0.482120838	-0.41943734	shadows
-74.93462813	7.938730583	0.0142	0.0175	0.0161	0.0204	0.0245	0.0299	0.039	0.0337	0.0438	0.0594	0.0484	0.0381	0.245841035	-0.500775194	shadows
-74.9523233	7.916299942	0.0253	0.0231	0.0269	0.0288	0.0382	0.0563	0.066	0.0623	0.0701	0.0812	0.0645	0.0415	0.367727772	-0.411378556	shadows
-74.93517252	7.938730668	0.0177	0.0211	0.0202	0.0191	0.0283	0.0413	0.052	0.0448	0.0566	0.0578	0.056	0.0399	0.402190923	-0.469816273	shadows
-74.93462812	7.938821038	0.0137	0.0169	0.0152	0.0187	0.0236	0.0318	0.0407	0.0344	0.0455	0.0622	0.0469	0.0356	0.29566855	-0.510466989	shadows
-74.92964349	7.90589431	0.0283	0.0275	0.0277	0.029	0.0332	0.028	0.0362	0.0311	0.0299	0.1073	0.0284	0.0182	0.034941764	-0.012477718	shadows
-74.95277694	7.916209537	0.0238	0.0222	0.0241	0.0232	0.0349	0.0501	0.0613	0.058	0.0641	0.0794	0.0622	0.0407	0.428571429	-0.441483198	shadows
-74.93490032	7.938730625	0.0164	0.0201	0.0195	0.0236	0.028	0.0349	0.0459	0.0413	0.0478	0.0577	0.0554	0.042	0.272727273	-0.479305741	shadows
-74.95241404	7.916209496	0.0251	0.0251	0.0275	0.0294	0.0383	0.0527	0.0637	0.0593	0.0662	0.0802	0.0641	0.0423	0.337091319	-0.399563319	shadows
-74.92918982	7.906165601	0.0274	0.03	0.0362	0.0275	0.0471	0.0846	0.1002	0.1029	0.1094	0.1254	0.0688	0.0328	0.578220859	-0.31047619	shadows
-74.97085841	7.523267157	0.0357	0.0413	0.0489	0.0358	0.0599	0.1171	0.1411	0.139	0.1484	0.2417	0.097	0.0557	0.590389016	-0.329677862	shadows
-74.95177891	7.916571247	0.0297	0.03	0.0308	0.0383	0.0512	0.0573	0.0703	0.0595	0.0707	0.0955	0.0755	0.0524	0.216768916	-0.420507996	shadows
-74.93508183	7.938459286	0.0178	0.019	0.0182	0.0201	0.0268	0.036	0.045	0.039	0.0479	0.0559	0.0544	0.04	0.319796954	-0.49862259	shadows
-74.93580761	7.938911678	0.017	0.0192	0.0205	0.0178	0.0289	0.0614	0.0762	0.0646	0.0804	0.0737	0.0544	0.0327	0.567961165	-0.452603471	shadows
-74.97118786	8.009651944	0.0534	0.047	0.0547	0.0468	0.0578	0.081	0.0978	0.0806	0.0987	0.1215	0.0728	0.0459	0.265306122	-0.141960784	shadows
-74.98688983	7.923086651	0.0215	0.022	0.0293	0.0148	0.0329	0.093	0.1239	0.1378	0.129	0.1621	0.0589	0.028	0.806028834	-0.335600907	shadows
-74.97221808	7.5227245	0.0358	0.0445	0.0478	0.0389	0.0616	0.12	0.1438	0.135	0.151	0.2416	0.0976	0.056	0.552616446	-0.342503439	shadows
-74.95232331	7.916209486	0.0255	0.0262	0.0273	0.0297	0.0385	0.0554	0.0651	0.0615	0.068	0.0809	0.0643	0.0421	0.348684211	-0.403930131	shadows
-74.99823088	7.906081142	0.0431	0.0382	0.0458	0.0358	0.0585	0.1179	0.1459	0.1336	0.1575	0.1599	0.0995	0.0548	0.577331759	-0.369580179	shadows
-74.9346283	7.937645114	0.0162	0.0186	0.0175	0.0165	0.0251	0.0321	0.0414	0.0454	0.0447	0.0585	0.0498	0.0352	0.466882068	-0.479940565	shadows
-74.90478746	7.895667873	0.015	0.0178	0.0216	0.0145	0.0283	0.0753	0.1046	0.0905	0.1067	0.1134	0.0462	0.0235	0.723809524	-0.362831858	shadows
-74.92918981	7.906256057	0.028	0.0299	0.0385	0.0294	0.0509	0.0927	0.111	0.1147	0.1207	0.1338	0.0749	0.0352	0.591950035	-0.320987654	shadows
-74.93508176	7.938911565	0.0165	0.0186	0.0204	0.0196	0.0293	0.0455	0.0563	0.0491	0.0588	0.0618	0.0544	0.0422	0.429403202	-0.454545455	shadows
-74.97212744	7.522724494	0.0357	0.0406	0.0473	0.0358	0.0606	0.1157	0.1386	0.1298	0.1463	0.2333	0.0961	0.0559	0.56763285	-0.340306834	shadows
-74.9520511	7.916480822	0.0266	0.0287	0.0288	0.0321	0.0443	0.0608	0.0706	0.0653	0.0727	0.0842	0.0707	0.047	0.340862423	-0.421105528	shadows
-74.93526328	7.938549771	0.0174	0.0179	0.0195	0.0179	0.0279	0.0448	0.0576	0.048	0.061	0.0595	0.0532	0.0348	0.456752656	-0.463548831	shadows
-74.93508188	7.938097463	0.0179	0.0189	0.0174	0.0187	0.0249	0.0314	0.0365	0.0348	0.0443	0.056	0.0546	0.0405	0.300934579	-0.516666667	shadows
-74.93526347	7.93728339	0.0196	0.0229	0.0212	0.0229	0.0295	0.0428	0.0539	0.0458	0.0534	0.0834	0.0541	0.0385	0.333333333	-0.436918991	shadows
-74.95186958	7.917113992	0.029	0.0319	0.0397	0.0404	0.0575	0.0888	0.1089	0.094	0.1138	0.1212	0.0906	0.05	0.398809524	-0.390636992	shadows
-74.95168832	7.91539531	0.0251	0.0287	0.0289	0.0336	0.0407	0.058	0.0679	0.0566	0.0712	0.0991	0.0664	0.0452	0.254988914	-0.393494229	shadows
-74.95341203	7.916209609	0.0257	0.025	0.025	0.0228	0.0341	0.0604	0.0758	0.0707	0.0786	0.1013	0.0571	0.0341	0.512299465	-0.390986602	shadows
-74.91736309	7.608471112	0.0309	0.035	0.0417	0.0317	0.0478	0.0914	0.1113	0.1079	0.1173	0.1339	0.0828	0.0488	0.545845272	-0.330120482	shadows
-74.93508184	7.938368831	0.0178	0.0189	0.0178	0.0197	0.026	0.0353	0.0425	0.0395	0.0461	0.0556	0.0539	0.0396	0.334459459	-0.50348675	shadows
-74.93517266	7.93782611	0.018	0.0211	0.0208	0.0208	0.0279	0.0392	0.0481	0.0416	0.0509	0.0623	0.0557	0.0386	0.333333333	-0.45620915	shadows
-74.95196048	7.915576253	0.0263	0.0313	0.0319	0.0335	0.0437	0.0677	0.0795	0.0749	0.079	0.0941	0.0688	0.0419	0.381918819	-0.366434955	shadows
-74.93634444	7.987848265	0.0112	0.0153	0.0165	0.0096	0.0175	0.0506	0.0699	0.0791	0.07	0.0612	0.033	0.0178	0.783540023	-0.333333333	shadows
-74.95244299	7.659584624	0.0286	0.0346	0.0381	0.0331	0.05	0.084	0.1011	0.101	0.1078	0.1843	0.0757	0.0475	0.506338553	-0.330404218	shadows
-74.93490052	7.937464245	0.0179	0.0215	0.0181	0.0191	0.0263	0.0336	0.044	0.0416	0.0458	0.0682	0.0546	0.0381	0.370675453	-0.502063274	shadows
-74.93526338	7.93791658	0.0176	0.0185	0.0205	0.0214	0.0288	0.0418	0.0507	0.0449	0.055	0.0646	0.0532	0.0369	0.354449472	-0.443690638	shadows
-74.95214187	7.916119009	0.0262	0.0263	0.0294	0.0366	0.0431	0.0546	0.0633	0.0592	0.0643	0.0819	0.0671	0.0453	0.235908142	-0.390673575	shadows
-74.97085841	7.5231767	0.0354	0.0427	0.0497	0.035	0.0588	0.1157	0.1395	0.1379	0.1472	0.2381	0.0967	0.0562	0.5951417	-0.321038251	shadows
-74.99795871	7.905447949	0.0437	0.0378	0.0454	0.031	0.0556	0.1111	0.1418	0.1328	0.1499	0.153	0.0881	0.0522	0.621489621	-0.319850187	shadows
-74.95196039	7.916390356	0.0271	0.031	0.0339	0.0434	0.0478	0.0596	0.0686	0.0642	0.0706	0.0846	0.0728	0.0486	0.19330855	-0.364573571	shadows
-74.93471883	7.938911508	0.0139	0.0169	0.0161	0.0191	0.0256	0.0334	0.0396	0.0367	0.045	0.0644	0.0486	0.0374	0.315412186	-0.502318393	shadows
-74.93490031	7.938821081	0.0158	0.0191	0.0192	0.0234	0.0277	0.0359	0.0465	0.0404	0.0486	0.0604	0.055	0.0417	0.26645768	-0.482479784	shadows
-74.94733399	7.911324268	0.023	0.0237	0.0279	0.0182	0.0444	0.1087	0.1413	0.1059	0.1525	0.1908	0.0839	0.0399	0.706688155	-0.500894454	shadows
-74.93453743	7.938549657	0.014	0.0167	0.0143	0.0196	0.0233	0.0264	0.0364	0.0344	0.0414	0.0576	0.0484	0.0381	0.274074074	-0.543859649	shadows
-74.95196037	7.916571268	0.0272	0.0287	0.0317	0.0407	0.0474	0.0604	0.0701	0.0624	0.0747	0.0882	0.0726	0.0493	0.210475267	-0.392138063	shadows
-74.99922884	7.908975735	0.0467	0.037	0.0454	0.0319	0.0547	0.1097	0.1366	0.135	0.1422	0.1409	0.0924	0.0534	0.617735171	-0.34107402	shadows
-74.98734345	7.9236294	0.023	0.02	0.0236	0.0129	0.0307	0.1014	0.1399	0.112	0.1603	0.2224	0.0657	0.0328	0.793434748	-0.471444569	shadows
-74.93508177	7.938821109	0.0172	0.0212	0.0217	0.0193	0.0291	0.0425	0.054	0.046	0.0566	0.0592	0.0555	0.0416	0.408882083	-0.437823834	shadows
-74.93480981	7.937373775	0.0176	0.021	0.019	0.0194	0.0265	0.0349	0.0443	0.0453	0.0479	0.0726	0.0539	0.0373	0.400309119	-0.478737997	shadows
-74.93517264	7.937916566	0.0178	0.0191	0.0194	0.0205	0.0272	0.037	0.0447	0.0416	0.0499	0.0612	0.0546	0.0385	0.339774557	-0.475675676	shadows
-74.93480956	7.938911523	0.0146	0.0179	0.0181	0.0235	0.0265	0.0352	0.0433	0.0372	0.0472	0.0637	0.0516	0.0394	0.225700165	-0.480631277	shadows
-74.92928056	7.90607516	0.0276	0.0249	0.0256	0.0246	0.0375	0.0551	0.0683	0.0445	0.0728	0.1217	0.0496	0.0257	0.287988423	-0.319148936	shadows
-74.93462833	7.937464202	0.0165	0.0173	0.0181	0.0192	0.0247	0.0335	0.042	0.0432	0.046	0.0679	0.0484	0.033	0.384615385	-0.455639098	shadows
-74.93661661	7.988210129	0.0099	0.0133	0.0126	0.0066	0.0148	0.0424	0.0623	0.0584	0.0643	0.0576	0.0324	0.0188	0.796923077	-0.44	shadows
-74.95196035	7.916661723	0.0273	0.0266	0.0309	0.0392	0.0476	0.0596	0.072	0.0656	0.0774	0.0914	0.0733	0.0507	0.251908397	-0.406909789	shadows
-74.93471887	7.938640141	0.0151	0.0185	0.0174	0.0227	0.0271	0.0302	0.0396	0.0348	0.0442	0.058	0.0523	0.0428	0.210434783	-0.50071736	shadows
-74.91872303	7.608290455	0.0329	0.0387	0.0433	0.0364	0.0564	0.0944	0.1126	0.1075	0.1182	0.1665	0.0986	0.0613	0.49409312	-0.389711064	shadows
-74.96411805	7.912501975	0.0226	0.0264	0.0295	0.0218	0.0359	0.0716	0.0836	0.0781	0.0881	0.1007	0.0598	0.0327	0.563563564	-0.339305711	shadows
-74.93462832	7.937554658	0.0163	0.0162	0.0169	0.0169	0.0249	0.0328	0.0417	0.0458	0.0453	0.0632	0.0491	0.0341	0.46092504	-0.487878788	shadows
-74.99922884	7.909156647	0.0453	0.0388	0.0439	0.0326	0.0528	0.1038	0.1292	0.121	0.134	0.1355	0.0912	0.0527	0.575520833	-0.350111029	shadows
-74.92955276	7.905894294	0.028	0.0268	0.0291	0.0278	0.0328	0.0305	0.0378	0.0316	0.0345	0.1081	0.0302	0.0185	0.063973064	-0.018549747	shadows
-74.99886594	7.907618895	0.0438	0.038	0.0429	0.0331	0.0525	0.1092	0.1402	0.126	0.1459	0.148	0.0881	0.0487	0.583909491	-0.345038168	shadows
-74.93462817	7.938459215	0.0148	0.0192	0.0168	0.0202	0.0255	0.0281	0.0375	0.0373	0.0419	0.0564	0.0519	0.0414	0.297391304	-0.510917031	shadows
-74.9517789	7.916661703	0.03	0.0326	0.0338	0.0425	0.0529	0.0593	0.0747	0.0623	0.0718	0.0991	0.0771	0.0534	0.188931298	-0.390441839	shadows
-74.98734345	7.923538944	0.023	0.0229	0.0293	0.0136	0.0332	0.1077	0.141	0.1399	0.1557	0.2107	0.0666	0.032	0.822801303	-0.38894682	shadows
-74.93906638	7.990019608	0.0161	0.0179	0.0326	0.0134	0.0406	0.121	0.1647	0.1804	0.1697	0.2048	0.0752	0.0342	0.861713106	-0.395176252	shadows
-74.96139615	7.913949027	0.0713	0.0323	0.0375	0.0369	0.0559	0.0914	0.1182	0.096	0.1285	0.2075	0.0908	0.061	0.44469526	-0.41543258	shadows
-74.93544489	7.937554785	0.0184	0.0216	0.0239	0.0224	0.033	0.0597	0.0727	0.0665	0.0757	0.0808	0.0558	0.0328	0.496062992	-0.400250941	shadows
-74.99931956	7.908975735	0.0466	0.0376	0.0451	0.0318	0.0543	0.1081	0.1351	0.1254	0.1387	0.1411	0.0929	0.0534	0.595419847	-0.346376812	shadows
-74.9350819	7.938007008	0.018	0.0206	0.0182	0.0197	0.0248	0.0306	0.0354	0.0373	0.0442	0.0569	0.0551	0.0404	0.30877193	-0.503410641	shadows
-74.93517263	7.938007022	0.0177	0.0203	0.0182	0.0201	0.0265	0.0349	0.0414	0.0387	0.0489	0.06	0.0536	0.0385	0.316326531	-0.493036212	shadows
-74.98743418	7.923629403	0.0238	0.0205	0.0256	0.0137	0.0413	0.1403	0.1922	0.1317	0.2088	0.2583	0.0864	0.0421	0.811554333	-0.542857143	shadows
-74.95259548	7.916299973	0.0241	0.0244	0.0261	0.0286	0.036	0.0502	0.0619	0.0581	0.0642	0.0796	0.0628	0.0404	0.340253749	-0.412823397	shadows
-74.9518696	7.916933081	0.0292	0.0295	0.0345	0.0425	0.0577	0.0807	0.0996	0.0724	0.1045	0.1054	0.0902	0.0539	0.260226284	-0.446672013	shadows
-74.93580759	7.939002134	0.017	0.0185	0.0229	0.0177	0.0306	0.0632	0.0759	0.0689	0.0817	0.0752	0.0562	0.0328	0.591224018	-0.420986094	shadows
-74.95196038	7.916480812	0.0272	0.0299	0.0322	0.0407	0.0473	0.0613	0.0683	0.0647	0.072	0.0851	0.072	0.0479	0.227703985	-0.381957774	shadows
-74.99922884	7.908885279	0.0474	0.0357	0.0456	0.0317	0.0549	0.1119	0.139	0.1334	0.1452	0.1436	0.0914	0.0527	0.615990309	-0.334306569	shadows
-74.90505966	7.895487024	0.018	0.0183	0.0231	0.0132	0.0308	0.0755	0.1006	0.0999	0.1048	0.144	0.0487	0.0242	0.766578249	-0.356545961	shadows
-74.9867991	7.922905736	0.0222	0.0224	0.0246	0.0158	0.0363	0.101	0.1359	0.1169	0.145	0.1699	0.0627	0.0294	0.761868877	-0.436426117	shadows
-74.98988354	7.935479186	0.0492	0.0279	0.0364	0.0262	0.0459	0.1073	0.1349	0.1163	0.1444	0.1901	0.092	0.0651	0.632280702	-0.433021807	shadows
-74.9712859	7.904904232	0.0241	0.0275	0.0244	0.0221	0.0317	0.052	0.0653	0.0548	0.0705	0.1054	0.0516	0.0339	0.425227568	-0.357894737	shadows
-74.9293713	7.90598472	0.0277	0.0275	0.0285	0.0283	0.0312	0.0336	0.0422	0.0339	0.0399	0.1162	0.0337	0.0192	0.090032154	-0.083601286	shadows
-74.97212745	7.522543579	0.0369	0.0444	0.0497	0.0383	0.0633	0.1222	0.1469	0.1414	0.1511	0.2337	0.1004	0.0578	0.573734001	-0.337774817	shadows
-74.95196049	7.915485797	0.0262	0.0293	0.0301	0.0294	0.0431	0.0645	0.0775	0.0707	0.0796	0.097	0.0687	0.042	0.412587413	-0.390688259	shadows
-74.99931956	7.909066191	0.0461	0.0406	0.0463	0.0329	0.054	0.1085	0.1354	0.1294	0.138	0.1386	0.0938	0.0549	0.594577942	-0.33904354	shadows
-74.9743027	7.525347896	0.0424	0.0484	0.0551	0.0447	0.0755	0.1525	0.1849	0.1843	0.1932	0.3125	0.1212	0.0653	0.609606987	-0.374929098	shadows
-74.93462834	7.937373746	0.0166	0.0201	0.0192	0.0193	0.0249	0.034	0.0431	0.0413	0.0464	0.0726	0.0488	0.0337	0.363036304	-0.435294118	shadows
-74.95186976	7.915485787	0.026	0.0278	0.0295	0.0298	0.0428	0.0634	0.0759	0.07	0.0781	0.0971	0.0689	0.0432	0.402805611	-0.400406504	shadows
-74.93535408	7.938097506	0.0169	0.0192	0.0183	0.0205	0.0253	0.0473	0.0615	0.0501	0.0659	0.0647	0.0482	0.031	0.419263456	-0.44962406	shadows
-74.97067712	7.523357603	0.0369	0.0451	0.0525	0.038	0.0648	0.125	0.1529	0.1503	0.1604	0.2544	0.1041	0.0604	0.596388741	-0.329501916	shadows
-74.95180838	7.658770441	0.0318	0.0357	0.0404	0.0331	0.0526	0.0944	0.1145	0.1096	0.1214	0.212	0.0799	0.0482	0.536089699	-0.328345802	shadows
-74.95186957	7.917204448	0.0286	0.0306	0.0395	0.0353	0.055	0.0882	0.1085	0.0956	0.1117	0.1336	0.0872	0.0471	0.46065699	-0.376479874	shadows
-74.95205109	7.916571278	0.0267	0.0272	0.0288	0.031	0.0452	0.0611	0.072	0.0648	0.076	0.0872	0.0712	0.0479	0.352818372	-0.424	shadows
-74.91745375	7.608471129	0.0312	0.0336	0.0393	0.0294	0.0485	0.0905	0.1093	0.1089	0.1162	0.1389	0.0846	0.051	0.57483731	-0.365617433	shadows
-74.95205104	7.917023557	0.0271	0.0332	0.0425	0.0449	0.0614	0.0935	0.109	0.1103	0.1191	0.1018	0.0937	0.0516	0.421391753	-0.375917768	shadows
-74.952443	7.659494167	0.0286	0.0344	0.0396	0.0364	0.0494	0.0855	0.103	0.1019	0.1095	0.1843	0.0762	0.0476	0.473608098	-0.316062176	shadows
-74.94605404	7.986311901	0.0195	0.0153	0.0192	0.0172	0.023	0.0348	0.0441	0.0272	0.0564	0.1048	0.033	0.0207	0.225225225	-0.264367816	shadows
-74.97421206	7.525347891	0.0418	0.0446	0.0516	0.0379	0.0718	0.1523	0.1849	0.1793	0.1999	0.3128	0.1164	0.0612	0.651012891	-0.385714286	shadows
-74.93526349	7.937192934	0.02	0.0236	0.0225	0.023	0.0292	0.0468	0.0565	0.0454	0.0564	0.087	0.0553	0.0368	0.32748538	-0.42159383	shadows
-74.95214188	7.916028553	0.0263	0.0258	0.029	0.0358	0.0416	0.0538	0.0631	0.0567	0.0667	0.0816	0.0662	0.0444	0.225945946	-0.390756303	shadows
-74.92955278	7.905803839	0.0277	0.0268	0.0317	0.0302	0.033	0.0325	0.0384	0.0295	0.038	0.0998	0.0306	0.0184	-0.011725293	0.017656501	shadows
-74.97699826	7.96324859	0.0178	0.016	0.0182	0.0113	0.0233	0.0597	0.0802	0.0718	0.0839	0.0892	0.0418	0.0225	0.728038508	-0.393333333	shadows
-74.93906639	7.989929152	0.0156	0.0176	0.0301	0.0131	0.0397	0.1248	0.1698	0.1648	0.1699	0.1978	0.0747	0.0318	0.852726251	-0.425572519	shadows
-74.97094905	7.523267163	0.0354	0.0433	0.0478	0.0351	0.0583	0.1153	0.1396	0.1344	0.1466	0.2375	0.094	0.0533	0.585840708	-0.325811001	shadows
-74.95244292	7.660217823	0.0287	0.0318	0.0354	0.0302	0.0472	0.0893	0.1113	0.1016	0.1152	0.1544	0.0734	0.045	0.541729894	-0.349264706	shadows
-74.94751554	7.910510188	0.0215	0.0207	0.0223	0.014	0.0295	0.0746	0.0985	0.0849	0.1019	0.1177	0.0486	0.0246	0.716885743	-0.370944993	shadows
-74.93508179	7.938730654	0.0179	0.0218	0.0204	0.0214	0.0289	0.0395	0.0518	0.0436	0.0545	0.0566	0.0567	0.041	0.341538462	-0.470817121	shadows
-74.99922883	7.912322605	0.0401	0.0305	0.0359	0.0235	0.046	0.1048	0.1348	0.1276	0.1432	0.1602	0.0767	0.0406	0.688947717	-0.362344583	shadows
-74.99759582	7.905176579	0.0462	0.0412	0.0468	0.0352	0.0606	0.1166	0.144	0.1387	0.1501	0.1689	0.1021	0.0567	0.595169638	-0.371390195	shadows
-74.98933931	7.929509087	0.0369	0.0365	0.0438	0.0407	0.0628	0.1019	0.122	0.1146	0.1282	0.1519	0.0945	0.055	0.475853187	-0.36659436	shadows
-74.95186978	7.915395331	0.0258	0.0288	0.03	0.0322	0.042	0.0607	0.0728	0.0634	0.0774	0.0996	0.0683	0.0439	0.326359833	-0.389623601	shadows
-74.93526332	7.938278403	0.0171	0.018	0.0176	0.0193	0.025	0.0413	0.0532	0.0415	0.058	0.0601	0.0498	0.0345	0.365131579	-0.477744807	shadows
-74.93508174	7.939002021	0.0158	0.0195	0.0194	0.0191	0.0282	0.0456	0.0567	0.0506	0.0609	0.0644	0.0535	0.0396	0.451936872	-0.46776406	shadows
-74.95168825	7.916028501	0.0283	0.0271	0.0287	0.0357	0.0456	0.0602	0.0712	0.0595	0.0719	0.0899	0.0709	0.0478	0.25	-0.423694779	shadows
-74.95049777	8.008021781	0.0223	0.0294	0.0418	0.0347	0.062	0.1331	0.1587	0.1428	0.1691	0.169	0.0967	0.0479	0.609014085	-0.396389892	shadows
-74.99768654	7.905086124	0.0461	0.039	0.0451	0.033	0.059	0.1175	0.1457	0.1416	0.1542	0.1611	0.0985	0.0554	0.621993127	-0.371866295	shadows
-74.93462829	7.937735569	0.0161	0.0186	0.0187	0.0174	0.0245	0.0321	0.0403	0.0449	0.0451	0.0576	0.0506	0.0362	0.44141252	-0.46031746	shadows
-74.9352634	7.937735669	0.018	0.0214	0.0212	0.0209	0.0299	0.0461	0.0567	0.0473	0.058	0.0675	0.055	0.0369	0.387096774	-0.443569554	shadows
-74.97067711	7.52344806	0.0373	0.0457	0.0527	0.0389	0.0669	0.1309	0.1593	0.1561	0.1661	0.2587	0.1063	0.0617	0.601025641	-0.337106918	shadows
-74.93480975	7.937735598	0.017	0.0202	0.0183	0.0203	0.0261	0.0313	0.0416	0.0397	0.0446	0.0583	0.0555	0.0399	0.323333333	-0.504065041	shadows
-74.9351725	7.938821124	0.0171	0.0201	0.019	0.0185	0.0286	0.0433	0.054	0.0481	0.0574	0.0603	0.0555	0.041	0.444444444	-0.489932886	shadows
-74.93444671	7.938459187	0.0137	0.0162	0.0131	0.0152	0.0207	0.0295	0.0402	0.0336	0.0439	0.0625	0.0449	0.0329	0.37704918	-0.548275862	shadows
-74.95205114	7.916118999	0.0265	0.0266	0.0306	0.0367	0.0451	0.0571	0.0675	0.0629	0.0673	0.0826	0.0693	0.0473	0.263052209	-0.387387387	shadows
-74.97249	7.522905432	0.0351	0.0386	0.0462	0.0335	0.0589	0.1284	0.1556	0.1432	0.1655	0.2656	0.092	0.0502	0.620826259	-0.331403763	shadows
-74.93462822	7.938187848	0.0154	0.0183	0.0159	0.0198	0.0244	0.0288	0.0369	0.0352	0.0415	0.0534	0.0534	0.0399	0.28	-0.541125541	shadows
-74.94623556	7.986040558	0.0144	0.0151	0.0177	0.0144	0.028	0.0551	0.0688	0.063	0.0698	0.0752	0.0454	0.0258	0.627906977	-0.438985737	shadows
-74.95040702	8.00802177	0.022	0.025	0.0422	0.0296	0.0589	0.1266	0.1562	0.1571	0.1695	0.1674	0.0916	0.0443	0.682913765	-0.369207773	shadows
-74.92946195	7.906437014	0.0306	0.0294	0.0419	0.0305	0.052	0.1015	0.1221	0.1264	0.1367	0.1706	0.0891	0.0441	0.611217336	-0.360305344	shadows
-74.95196047	7.915666709	0.0264	0.0303	0.0325	0.032	0.0428	0.0682	0.0828	0.0744	0.0796	0.0912	0.0678	0.0421	0.398496241	-0.351944167	shadows
-74.91645651	7.608380481	0.0294	0.0314	0.037	0.0258	0.0465	0.0938	0.1178	0.1146	0.1217	0.1264	0.0807	0.0477	0.632478632	-0.371282923	shadows
-74.95244298	7.659675081	0.0286	0.0327	0.0353	0.0315	0.0497	0.0834	0.1009	0.0992	0.107	0.1844	0.0755	0.0475	0.517980107	-0.362815884	shadows
-74.99922884	7.908794823	0.0477	0.0386	0.046	0.0331	0.0548	0.1116	0.139	0.13	0.145	0.1464	0.0922	0.0529	0.59411404	-0.334298119	shadows
-74.93535405	7.938278417	0.0168	0.0154	0.0176	0.015	0.023	0.048	0.0646	0.0536	0.0681	0.0625	0.0462	0.0296	0.562682216	-0.448275862	shadows
-74.93526326	7.938640226	0.0175	0.0194	0.0195	0.0178	0.0278	0.044	0.0549	0.0497	0.0598	0.0592	0.0542	0.0368	0.472592593	-0.47082768	shadows
-74.95208024	7.660127326	0.0311	0.036	0.0415	0.0375	0.0527	0.0907	0.1076	0.0982	0.1146	0.1777	0.0815	0.0495	0.447310243	-0.325203252	shadows
-74.95196025	7.917566282	0.0259	0.0255	0.0384	0.028	0.0583	0.1285	0.1567	0.1422	0.1609	0.1727	0.0909	0.0422	0.670975323	-0.406032483	shadows
-74.95205097	7.917656748	0.0274	0.0233	0.0358	0.0233	0.054	0.1219	0.1542	0.161	0.1667	0.1918	0.0951	0.0488	0.747151384	-0.453017571	shadows
-74.95205108	7.916661734	0.0268	0.0264	0.0288	0.0299	0.0461	0.0614	0.0734	0.0675	0.0794	0.0901	0.0716	0.0487	0.386036961	-0.426294821	shadows
-74.95232329	7.916390398	0.0251	0.0239	0.0267	0.0276	0.0385	0.0568	0.0698	0.0631	0.072	0.0815	0.0644	0.0414	0.391400221	-0.413830955	shadows
-74.95214189	7.915938097	0.0263	0.0252	0.0276	0.0357	0.0402	0.053	0.0629	0.0548	0.0691	0.0812	0.0654	0.0435	0.211049724	-0.406451613	shadows
-74.9515068	7.91602848	0.0293	0.0262	0.0277	0.0302	0.0427	0.0567	0.0674	0.0607	0.0698	0.0946	0.0712	0.0483	0.335533553	-0.43983822	shadows
-74.95271494	7.660127396	0.0277	0.0327	0.0369	0.0294	0.0456	0.0911	0.1117	0.1016	0.1218	0.1601	0.0719	0.0435	0.551145038	-0.321691176	shadows
-74.95177906	7.915304864	0.0261	0.0303	0.0293	0.0339	0.042	0.058	0.0672	0.0598	0.0732	0.1195	0.0667	0.045	0.276414088	-0.389583333	shadows
-74.95244291	7.66030828	0.0287	0.0335	0.0377	0.0303	0.046	0.0895	0.1138	0.1104	0.1181	0.1484	0.0724	0.0438	0.569296375	-0.315168029	shadows
-74.95268621	7.916299983	0.0237	0.0236	0.0238	0.0247	0.0349	0.0501	0.0607	0.056	0.0628	0.0795	0.062	0.0399	0.387856258	-0.445221445	shadows
-74.98943004	7.929509089	0.0378	0.0371	0.0458	0.0422	0.0649	0.1056	0.128	0.116	0.1336	0.1555	0.0991	0.0563	0.466498104	-0.36783989	shadows
-74.97221809	7.522634043	0.0363	0.0445	0.0493	0.0408	0.0636	0.1214	0.1462	0.1395	0.1514	0.2419	0.1	0.0572	0.547420965	-0.339584729	shadows
-74.95168833	7.915304854	0.0257	0.0264	0.0281	0.0318	0.0407	0.0565	0.0671	0.0561	0.0699	0.1192	0.0649	0.0441	0.276450512	-0.395698925	shadows
-74.93535401	7.938549785	0.0172	0.0189	0.0188	0.0164	0.026	0.0496	0.064	0.0587	0.069	0.0612	0.0495	0.0314	0.563249001	-0.449487555	shadows
-74.9344467	7.938549643	0.0134	0.0143	0.0131	0.0142	0.0204	0.0299	0.0427	0.033	0.045	0.0638	0.0443	0.0325	0.398305085	-0.543554007	shadows
-74.95253367	7.659494177	0.0286	0.0301	0.0363	0.03	0.0467	0.0842	0.0983	0.0954	0.1075	0.1839	0.0751	0.0473	0.5215311	-0.348294434	shadows
-74.97074153	7.905266018	0.0237	0.0244	0.0243	0.0165	0.0291	0.0674	0.0922	0.0817	0.0954	0.1062	0.0513	0.0308	0.66395112	-0.357142857	shadows
-74.94751555	7.910419732	0.0222	0.0231	0.0245	0.0146	0.0306	0.0738	0.097	0.0835	0.1018	0.1265	0.0485	0.0256	0.702344546	-0.328767123	shadows
-74.98779706	7.924714884	0.0252	0.0267	0.0378	0.0203	0.0581	0.1735	0.2311	0.2034	0.2502	0.2651	0.1056	0.0511	0.818506929	-0.472803347	shadows
-74.95186951	7.917656728	0.0295	0.0251	0.0406	0.0236	0.0597	0.1432	0.1841	0.1787	0.1924	0.2114	0.0985	0.0476	0.766683144	-0.416247304	shadows
-74.98653497	7.671075074	0.0389	0.0348	0.0434	0.0303	0.0636	0.1647	0.2137	0.1865	0.2287	0.2644	0.1053	0.0499	0.720479705	-0.416274378	shadows
-74.93471892	7.938368774	0.0156	0.0205	0.017	0.0208	0.0274	0.0309	0.041	0.0368	0.0434	0.0554	0.0556	0.0444	0.277777778	-0.531680441	shadows
-74.94742471	7.91132428	0.0232	0.0249	0.0292	0.0189	0.0413	0.0867	0.1104	0.0816	0.1187	0.1772	0.0727	0.0357	0.623880597	-0.426889107	shadows
-74.94760628	7.910419744	0.0223	0.0217	0.0238	0.0151	0.03	0.073	0.096	0.0761	0.1005	0.1236	0.0467	0.026	0.668859649	-0.324822695	shadows
-74.95350275	7.916209619	0.0264	0.0266	0.0243	0.0236	0.0355	0.065	0.0808	0.0665	0.0852	0.1068	0.0599	0.0352	0.476137625	-0.42280285	shadows
-74.97439336	7.525076529	0.044	0.0446	0.0528	0.0408	0.0777	0.1638	0.202	0.1714	0.2187	0.3259	0.1265	0.0703	0.615457116	-0.411042945	shadows
-74.92937124	7.906346543	0.0295	0.0287	0.0382	0.0282	0.052	0.0958	0.1185	0.1118	0.1328	0.1524	0.0823	0.0395	0.597142857	-0.365975104	shadows
-74.90515024	7.896120235	0.0161	0.0193	0.0259	0.0145	0.0381	0.1003	0.1263	0.1218	0.1294	0.1307	0.0583	0.0261	0.787234043	-0.3847981	shadows
-74.97094906	7.523176706	0.0351	0.0427	0.0487	0.034	0.0571	0.1129	0.1378	0.1328	0.1446	0.2341	0.0938	0.054	0.592326139	-0.316491228	shadows
-74.90505964	7.895577479	0.0175	0.0181	0.0225	0.0134	0.0301	0.0765	0.0988	0.0945	0.1026	0.1387	0.0491	0.0233	0.751621872	-0.37150838	shadows
-74.90397048	7.897748172	0.01	0.014	0.0143	0.009	0.02	0.0491	0.0654	0.0573	0.069	0.0764	0.038	0.0211	0.728506787	-0.453154876	shadows
-74.93562644	7.937012079	0.0244	0.0225	0.0276	0.0203	0.0364	0.069	0.0828	0.0754	0.0867	0.1348	0.0597	0.034	0.575757576	-0.367697595	shadows
-74.95350274	7.916300075	0.0257	0.023	0.0242	0.0198	0.0352	0.0663	0.0822	0.0679	0.0865	0.1049	0.0585	0.0346	0.548460661	-0.414752116	shadows
-74.9366166	7.988300585	0.0099	0.0121	0.0121	0.0062	0.0146	0.0425	0.0634	0.0568	0.0657	0.0582	0.0317	0.0188	0.803174603	-0.447488584	shadows
-74.90406089	7.89910503	0.0119	0.0233	0.0251	0.0204	0.0327	0.0581	0.0746	0.0681	0.078	0.0818	0.0583	0.0327	0.538983051	-0.398081535	shadows
-74.97067712	7.523267145	0.0364	0.0464	0.0504	0.0368	0.0632	0.1214	0.1471	0.1419	0.1541	0.2502	0.1012	0.0586	0.588136542	-0.335092348	shadows
-74.90397002	7.8997382	0.0133	0.0196	0.0221	0.0147	0.0324	0.0727	0.0903	0.0865	0.0964	0.0962	0.0529	0.0278	0.709486166	-0.410666667	shadows
-74.90397014	7.899195465	0.0125	0.0241	0.0256	0.0205	0.0316	0.0593	0.0758	0.0668	0.0794	0.0846	0.0562	0.0316	0.530355097	-0.37408313	shadows
-74.9351726	7.938187933	0.0174	0.0185	0.017	0.0201	0.0252	0.0362	0.0441	0.0357	0.0504	0.0578	0.0521	0.0379	0.279569892	-0.507959479	shadows
-74.97248999	7.52299589	0.0347	0.0371	0.0445	0.0308	0.0566	0.1268	0.1565	0.1455	0.1657	0.2651	0.0887	0.0483	0.650595576	-0.331831832	shadows
-74.95177898	7.916028511	0.0278	0.0277	0.0302	0.0332	0.0476	0.0621	0.0745	0.0655	0.0767	0.0875	0.0723	0.0482	0.327254306	-0.410731707	shadows
-74.95286767	7.916209548	0.0235	0.023	0.0243	0.0243	0.0341	0.0509	0.0625	0.0554	0.067	0.0794	0.0616	0.0399	0.3902133	-0.434225844	shadows
-74.95196034	7.916752179	0.0274	0.026	0.0312	0.0404	0.0512	0.0672	0.0838	0.0637	0.0896	0.0946	0.0803	0.0529	0.223823247	-0.440358744	shadows
-74.95159752	7.91602849	0.0288	0.0273	0.028	0.0353	0.0436	0.0584	0.0679	0.0574	0.0672	0.0922	0.0695	0.0475	0.238403452	-0.425641026	shadows
-74.9355357	7.937102521	0.0215	0.0238	0.0243	0.023	0.0363	0.0637	0.077	0.069	0.081	0.0996	0.0559	0.0329	0.5	-0.394014963	shadows
-74.95205105	7.916933102	0.027	0.0289	0.0341	0.038	0.0572	0.0847	0.102	0.0854	0.1087	0.0989	0.0898	0.052	0.384116694	-0.449556094	shadows
-74.97076777	7.523267151	0.0361	0.0434	0.05	0.0369	0.0615	0.1192	0.1441	0.144	0.1513	0.246	0.0991	0.0571	0.592039801	-0.329309188	shadows
-74.95280561	7.660127406	0.0275	0.0321	0.0376	0.0285	0.0451	0.0916	0.1145	0.1036	0.1242	0.1621	0.0713	0.0438	0.568508706	-0.309458219	shadows
-74.91872301	7.608380912	0.034	0.0409	0.0447	0.0395	0.0585	0.0962	0.1157	0.1118	0.1184	0.1744	0.104	0.0642	0.477858559	-0.398789509	shadows
-74.93508181	7.938549742	0.0178	0.0198	0.0189	0.0205	0.0277	0.0368	0.0475	0.0408	0.0497	0.0561	0.0549	0.0404	0.331158238	-0.487804878	shadows
-74.97699826	7.963158134	0.0179	0.0168	0.0184	0.0108	0.0243	0.0602	0.0777	0.0754	0.0817	0.0883	0.042	0.0226	0.749419954	-0.390728477	shadows
-74.9524429	7.660398737	0.0294	0.0336	0.0387	0.0317	0.0462	0.0903	0.1137	0.1034	0.1193	0.147	0.0737	0.0446	0.530717987	-0.3113879	shadows
-74.91609385	7.608470868	0.0305	0.0355	0.0428	0.0318	0.0509	0.0979	0.1146	0.1082	0.1225	0.1313	0.0872	0.0506	0.545714286	-0.341538462	shadows
-74.91401941	7.999784349	0.0273	0.0222	0.032	0.0194	0.0529	0.1445	0.185	0.162	0.1973	0.2209	0.0856	0.0359	0.786108049	-0.455782313	shadows
-74.94605403	7.986402356	0.0208	0.0143	0.0183	0.0152	0.0278	0.0543	0.07	0.048	0.0783	0.1111	0.044	0.0254	0.518987342	-0.412520064	shadows
-74.93453737	7.93891148	0.0127	0.0124	0.0115	0.0114	0.0198	0.0342	0.0452	0.0412	0.0496	0.0656	0.0425	0.0288	0.566539924	-0.574074074	shadows
-74.90270066	7.896481496	0.0152	0.0261	0.029	0.0292	0.0294	0.0546	0.0699	0.0622	0.0749	0.1029	0.047	0.0274	0.361050328	-0.236842105	shadows
-74.95205113	7.916209455	0.0265	0.0277	0.0308	0.0374	0.0449	0.0573	0.068	0.0603	0.0678	0.083	0.0701	0.0471	0.234390993	-0.389494549	shadows
-74.95186952	7.917566272	0.027	0.0253	0.0378	0.0236	0.0586	0.1379	0.1737	0.1512	0.1769	0.1831	0.0931	0.0438	0.729977117	-0.422459893	shadows
-74.93517257	7.938368845	0.0175	0.0188	0.017	0.0181	0.0253	0.0389	0.0491	0.041	0.0529	0.0578	0.0517	0.0367	0.387478849	-0.505094614	shadows
-74.91754441	7.608471147	0.0314	0.0366	0.0388	0.0308	0.0492	0.0896	0.1074	0.1101	0.1151	0.1439	0.0863	0.0532	0.562810504	-0.379696243	shadows
-74.96311995	7.913949182	0.0332	0.0278	0.0367	0.0279	0.0504	0.0993	0.1222	0.1066	0.1334	0.1705	0.0817	0.0444	0.585130112	-0.380067568	shadows
-74.9706771	7.523538518	0.0378	0.0502	0.0565	0.042	0.0691	0.1369	0.1658	0.1664	0.1719	0.263	0.1086	0.0631	0.596928983	-0.315566323	shadows
-74.99941029	7.90888528	0.0458	0.0386	0.0423	0.0317	0.054	0.1069	0.1333	0.1255	0.1417	0.1485	0.0935	0.0536	0.596692112	-0.377025037	shadows
-74.97421207	7.525257433	0.0416	0.0405	0.0484	0.0369	0.0683	0.1477	0.1812	0.1729	0.1958	0.3111	0.1103	0.0594	0.648236416	-0.390044108	shadows
-74.95150681	7.915938024	0.0286	0.0237	0.026	0.0257	0.0416	0.0565	0.0671	0.0631	0.07	0.0931	0.0687	0.0466	0.421171171	-0.450897571	shadows
-74.95196033	7.916842635	0.0275	0.029	0.0294	0.0385	0.0549	0.0748	0.0957	0.0688	0.1019	0.0978	0.0874	0.0552	0.282385834	-0.496575342	shadows
-74.93508187	7.938187919	0.0178	0.0186	0.0167	0.0191	0.025	0.0323	0.0377	0.0354	0.0445	0.0552	0.0541	0.0407	0.299082569	-0.528248588	shadows
-74.93462827	7.937826025	0.0159	0.0177	0.0186	0.0182	0.0239	0.0321	0.0391	0.0455	0.0455	0.0568	0.0515	0.0373	0.428571429	-0.469329529	shadows
-74.93526329	7.938459315	0.0173	0.0188	0.0207	0.019	0.0263	0.0436	0.0567	0.0498	0.0603	0.0597	0.0514	0.0343	0.447674419	-0.425797503	shadows
-74.93544485	7.937826153	0.0174	0.0207	0.0218	0.0207	0.0295	0.0554	0.0686	0.062	0.0714	0.0736	0.0525	0.0322	0.499395405	-0.413189771	shadows
-74.99913811	7.912322604	0.0406	0.0322	0.039	0.0269	0.0493	0.1056	0.1359	0.1387	0.146	0.1698	0.0786	0.0422	0.675120773	-0.336734694	shadows
-74.91881366	7.608471386	0.0357	0.042	0.0491	0.0423	0.0681	0.1083	0.1282	0.1207	0.1273	0.1875	0.1207	0.0715	0.480981595	-0.421672556	shadows
-74.9075783	7.577985074	0.0287	0.0321	0.0377	0.0266	0.0536	0.1127	0.1394	0.1314	0.149	0.2235	0.0774	0.0434	0.663291139	-0.344917463	shadows
-74.93471899	7.937916495	0.0163	0.0192	0.0185	0.0209	0.0253	0.0302	0.0409	0.0399	0.0442	0.0563	0.0561	0.0408	0.3125	-0.504021448	shadows
-74.947604	7.928420459	0.0225	0.0237	0.0237	0.0185	0.026	0.0441	0.0528	0.049	0.0558	0.0978	0.0414	0.0228	0.451851852	-0.271889401	shadows
-74.93661674	7.987396029	0.0131	0.0167	0.0196	0.0097	0.0209	0.0553	0.0737	0.1131	0.0808	0.1097	0.0394	0.021	0.842019544	-0.33559322	shadows
-74.971221	7.522995808	0.0341	0.0381	0.0441	0.0306	0.0534	0.1114	0.1325	0.129	0.1434	0.2242	0.0868	0.0492	0.616541353	-0.326203209	shadows
-74.93490049	7.937645156	0.0175	0.0216	0.0192	0.022	0.0266	0.0314	0.0406	0.039	0.0443	0.0595	0.0566	0.0407	0.278688525	-0.493403694	shadows
-74.95168837	7.915033486	0.0275	0.029	0.0324	0.028	0.0417	0.0716	0.0832	0.0891	0.0859	0.1797	0.0706	0.0397	0.52177626	-0.370873786	shadows
-74.95186962	7.916752169	0.0288	0.0308	0.033	0.0446	0.0528	0.0657	0.0816	0.0615	0.0839	0.0986	0.0808	0.0535	0.159283695	-0.420035149	shadows
-74.95235225	7.660217813	0.0294	0.0339	0.0357	0.0299	0.0478	0.0895	0.1106	0.1019	0.1158	0.1597	0.0742	0.0453	0.546282246	-0.350318471	shadows
-74.95168824	7.916118957	0.0287	0.0287	0.0317	0.0361	0.0462	0.0593	0.0709	0.0625	0.0721	0.091	0.0719	0.049	0.267748479	-0.388030888	shadows
-74.90279137	7.896571973	0.0136	0.0137	0.0183	0.0117	0.0236	0.0484	0.0704	0.0629	0.0737	0.0955	0.0429	0.0246	0.686327078	-0.401960784	shadows
-74.95241403	7.916299952	0.0249	0.0241	0.0273	0.0286	0.0376	0.0533	0.0645	0.0596	0.0679	0.0805	0.0641	0.0412	0.351473923	-0.402625821	shadows
-74.90496892	7.895577459	0.0168	0.0199	0.0221	0.0128	0.0286	0.0805	0.1016	0.1004	0.1075	0.1316	0.0481	0.0235	0.77385159	-0.37037037	shadows
-74.93453736	7.939001936	0.0123	0.0116	0.0116	0.01	0.0196	0.0393	0.0545	0.0468	0.0572	0.0685	0.0408	0.0267	0.647887324	-0.557251908	shadows
-74.93508186	7.938278375	0.0178	0.0193	0.0186	0.0197	0.0255	0.0338	0.0401	0.0371	0.0453	0.0554	0.054	0.0401	0.306338028	-0.487603306	shadows
-74.93535416	7.937554771	0.0185	0.0218	0.0223	0.0248	0.0317	0.0529	0.0646	0.057	0.0669	0.0767	0.0558	0.0346	0.393643032	-0.42893726	shadows
-74.95177904	7.915485776	0.0258	0.0278	0.03	0.0322	0.0424	0.0622	0.0742	0.0667	0.0766	0.0972	0.069	0.0445	0.348837209	-0.393939394	shadows
-74.9350818	7.938640198	0.0178	0.0185	0.0197	0.0198	0.0283	0.0381	0.0496	0.0417	0.0521	0.0563	0.0558	0.0407	0.356097561	-0.478145695	shadows
-74.9864443	7.671165528	0.0383	0.0361	0.044	0.03	0.0614	0.157	0.2022	0.1788	0.2163	0.2522	0.1018	0.0476	0.712643678	-0.396433471	shadows
-74.93517249	7.938911579	0.0165	0.0188	0.0187	0.0185	0.0289	0.0453	0.056	0.0499	0.0582	0.0628	0.055	0.0422	0.459064327	-0.492537313	shadows
-74.93625378	7.987305518	0.014	0.0169	0.0181	0.0107	0.0241	0.0687	0.0944	0.0838	0.0991	0.1077	0.0433	0.0225	0.773544974	-0.410423453	shadows
-74.90515038	7.895487044	0.0187	0.0201	0.023	0.0135	0.0316	0.0699	0.0964	0.0912	0.0983	0.1517	0.0496	0.0239	0.742120344	-0.366391185	shadows
-74.95241402	7.916390408	0.0246	0.0248	0.0269	0.029	0.0375	0.0546	0.0677	0.0599	0.07	0.0808	0.0638	0.0405	0.347581552	-0.406835722	shadows
-74.93453741	7.938640113	0.0137	0.0167	0.0143	0.0175	0.0226	0.0276	0.0374	0.0349	0.0422	0.0588	0.047	0.0365	0.332061069	-0.533442088	shadows
-74.947334	7.911233813	0.0224	0.0212	0.0263	0.0164	0.0342	0.0805	0.1067	0.0923	0.1123	0.1699	0.0635	0.0292	0.69825207	-0.414253898	shadows
-74.95186965	7.916480801	0.0283	0.0306	0.0335	0.0403	0.0484	0.0583	0.0671	0.0619	0.0708	0.0885	0.0729	0.0497	0.211350294	-0.370300752	shadows
-74.96130544	7.913858562	0.0585	0.0414	0.0477	0.0472	0.0596	0.0962	0.1179	0.1202	0.1233	0.1926	0.0972	0.0634	0.436081243	-0.341614907	shadows
-74.95189906	7.658679994	0.0314	0.0361	0.0426	0.033	0.0518	0.0948	0.113	0.1059	0.1214	0.2085	0.0797	0.0471	0.524838013	-0.303352412	shadows
-74.93589832	7.939002148	0.0173	0.0168	0.0235	0.0159	0.0301	0.0661	0.0796	0.0698	0.0846	0.0778	0.056	0.0316	0.628938156	-0.408805031	shadows
-74.97221808	7.522814958	0.0352	0.041	0.0484	0.0378	0.0596	0.1187	0.1414	0.1354	0.1506	0.2413	0.0952	0.0549	0.563510393	-0.325905292	shadows
-74.99051866	7.935388745	0.0291	0.0288	0.0401	0.0298	0.0452	0.1042	0.1317	0.1202	0.138	0.1409	0.0772	0.0435	0.602666667	-0.316283035	shadows
-74.95141608	7.915938013	0.029	0.0245	0.0263	0.0293	0.0399	0.054	0.0663	0.0555	0.0727	0.0953	0.0688	0.0467	0.308962264	-0.446898002	shadows
-74.97203681	7.522543573	0.0369	0.0423	0.0508	0.0439	0.0637	0.1166	0.1404	0.129	0.145	0.2333	0.0995	0.0576	0.492192019	-0.324018629	shadows
-74.99922883	7.91241306	0.0409	0.0327	0.0365	0.0238	0.0471	0.1091	0.1432	0.1262	0.1504	0.1653	0.0784	0.0417	0.682666667	-0.364664926	shadows
-74.95186973	7.915757154	0.0266	0.0261	0.0291	0.0299	0.0431	0.0654	0.0813	0.0715	0.0771	0.0896	0.068	0.0432	0.41025641	-0.40061792	shadows
-74.90515022	7.896210691	0.016	0.0185	0.0228	0.0136	0.0351	0.0926	0.1155	0.0971	0.1144	0.1313	0.0535	0.0251	0.754290876	-0.402359109	shadows
-74.91093379	8.001140526	0.0239	0.0204	0.0303	0.0171	0.0407	0.1036	0.1296	0.1272	0.1334	0.1451	0.0642	0.0314	0.762993763	-0.358730159	shadows
-74.97448401	7.525076534	0.0453	0.0446	0.0586	0.0466	0.0836	0.1685	0.2095	0.1866	0.2278	0.3303	0.1363	0.0763	0.600343053	-0.398665983	shadows
-74.95177892	7.916480791	0.0295	0.0275	0.0294	0.034	0.0496	0.0553	0.0659	0.0586	0.0697	0.0919	0.0739	0.0515	0.265658747	-0.430784124	shadows
-74.96420878	7.912501983	0.0225	0.0264	0.0279	0.0218	0.0346	0.0693	0.0846	0.0794	0.089	0.1017	0.0581	0.0315	0.56916996	-0.351162791	shadows
-74.9346281	7.938911494	0.0133	0.0161	0.0138	0.0166	0.0227	0.0338	0.0424	0.0333	0.0473	0.065	0.0455	0.0331	0.334669339	-0.534569983	shadows
-74.94759666	7.986221644	0.0147	0.0169	0.0163	0.0127	0.0184	0.0347	0.0465	0.0393	0.0485	0.0546	0.0312	0.0189	0.511538462	-0.313684211	shadows
-74.94760626	7.9105102	0.0217	0.0215	0.0214	0.0148	0.03	0.0781	0.1014	0.085	0.1059	0.1152	0.0469	0.0246	0.703406814	-0.373352855	shadows
-74.97164881	7.904632889	0.0255	0.0282	0.0271	0.0254	0.0322	0.0598	0.0728	0.0601	0.0769	0.1307	0.0545	0.036	0.405847953	-0.335784314	shadows
-74.99913811	7.912232148	0.0397	0.0346	0.0433	0.0283	0.0502	0.1089	0.137	0.1476	0.1476	0.164	0.0801	0.0428	0.678226265	-0.29821718	shadows
-74.95241401	7.916480864	0.0244	0.0257	0.0271	0.0288	0.0374	0.0559	0.0709	0.0593	0.0722	0.0811	0.0636	0.0399	0.346197503	-0.402425579	shadows
-74.95205103	7.917114013	0.0269	0.0351	0.0451	0.0437	0.0598	0.0925	0.1087	0.1181	0.1159	0.1123	0.0937	0.0514	0.459826947	-0.350144092	shadows
-74.97137662	7.904904238	0.0241	0.0233	0.0239	0.0205	0.0309	0.0521	0.0661	0.0547	0.0728	0.1061	0.0496	0.0337	0.454787234	-0.349659864	shadows
-74.9362538	7.987215062	0.0146	0.0173	0.0203	0.0109	0.0285	0.0838	0.1137	0.0929	0.1178	0.1215	0.0504	0.0249	0.789980732	-0.425742574	shadows
-74.93480968	7.938187877	0.0164	0.0208	0.0183	0.0209	0.0261	0.0312	0.0392	0.038	0.0444	0.0541	0.057	0.0422	0.290322581	-0.513944223	shadows
-74.99042793	7.935388743	0.0314	0.0244	0.0372	0.0263	0.0463	0.1044	0.1348	0.113	0.14	0.1437	0.0798	0.0461	0.622397703	-0.364102564	shadows
-74.97844781	8.005853256	0.0226	0.0249	0.0271	0.021	0.0305	0.048	0.0575	0.0582	0.0596	0.0657	0.04	0.0254	0.46969697	-0.192250373	shadows
-74.91763507	7.608471164	0.0317	0.0337	0.0401	0.0315	0.0506	0.0916	0.1101	0.1139	0.1171	0.1488	0.091	0.0555	0.566712517	-0.388253242	shadows
-74.95250475	7.916299962	0.0245	0.0278	0.0277	0.0306	0.0371	0.0504	0.0631	0.0597	0.0657	0.0798	0.0637	0.041	0.322259136	-0.393873085	shadows
-74.99759582	7.905086123	0.0467	0.0405	0.0481	0.0373	0.0618	0.1162	0.1429	0.1326	0.1501	0.1715	0.1009	0.0564	0.560918187	-0.354362416	shadows
-74.9743027	7.525438354	0.0426	0.047	0.0563	0.0442	0.0819	0.1662	0.203	0.1961	0.2131	0.3141	0.1326	0.0696	0.632126509	-0.403917417	shadows
-74.98688982	7.923177107	0.0211	0.0204	0.0235	0.0143	0.0293	0.0825	0.111	0.1142	0.1129	0.1556	0.055	0.0267	0.777431907	-0.401273885	shadows
-74.97212743	7.522814952	0.0351	0.041	0.0469	0.0336	0.0586	0.1155	0.1382	0.131	0.1477	0.233	0.0936	0.0542	0.591737546	-0.332384342	shadows
-74.97076776	7.523357609	0.0365	0.0448	0.0515	0.0373	0.0629	0.1218	0.1478	0.1463	0.155	0.2499	0.1007	0.0578	0.593681917	-0.32325887	shadows
-74.98979296	7.929418642	0.0445	0.0401	0.053	0.0444	0.0904	0.151	0.1798	0.1389	0.2	0.2465	0.161	0.092	0.515548282	-0.504672897	shadows
-74.95358536	7.988483748	0.0204	0.0251	0.0293	0.0204	0.0327	0.0704	0.0917	0.0844	0.0935	0.1321	0.0535	0.0279	0.610687023	-0.292270531	shadows
-74.93897564	7.990019595	0.0154	0.015	0.0217	0.0117	0.0366	0.1142	0.1551	0.1283	0.1639	0.1914	0.0707	0.0327	0.832857143	-0.53030303	shadows
-74.93462836	7.937283291	0.0168	0.0212	0.0198	0.0196	0.0251	0.0346	0.0441	0.0434	0.0468	0.0773	0.0492	0.0345	0.377777778	-0.426086957	shadows
-74.99750509	7.905086123	0.0474	0.0438	0.05	0.05	0.0647	0.115	0.1402	0.1234	0.146	0.1819	0.1034	0.0574	0.423298731	-0.348109518	shadows
-74.93570828	7.993999142	0.0406	0.0315	0.0449	0.0314	0.0628	0.1365	0.1734	0.1822	0.1807	0.2368	0.1009	0.0539	0.705992509	-0.384087791	shadows
-74.9519604	7.9162999	0.027	0.0303	0.0317	0.0403	0.0483	0.058	0.0689	0.0623	0.0692	0.0841	0.0737	0.0493	0.214424951	-0.398481973	shadows
-74.97083225	7.905266024	0.0236	0.0236	0.0241	0.017	0.0283	0.0669	0.0892	0.0807	0.0945	0.1048	0.0523	0.0311	0.651995906	-0.369109948	shadows
-74.90748766	7.577894598	0.0287	0.0313	0.0383	0.0267	0.0527	0.1144	0.1407	0.1331	0.1503	0.225	0.0768	0.0421	0.66583229	-0.334491746	shadows
-74.95253358	7.66030829	0.0279	0.0343	0.0372	0.0303	0.0454	0.0896	0.1173	0.0998	0.1183	0.1422	0.0716	0.0435	0.534204458	-0.316176471	shadows
-74.95232317	7.917475868	0.0261	0.0334	0.0414	0.0521	0.0628	0.0944	0.1153	0.1032	0.1158	0.1329	0.0999	0.0566	0.329040567	-0.414012739	shadows
-74.9866174	7.930504023	0.0344	0.0352	0.0427	0.0415	0.0605	0.0987	0.1195	0.1042	0.122	0.1744	0.0938	0.0542	0.430336307	-0.374358974	shadows
-74.9867991	7.923086648	0.0209	0.021	0.0262	0.0154	0.0317	0.0897	0.1215	0.118	0.1256	0.1388	0.057	0.0277	0.769115442	-0.370192308	shadows
-74.94769473	7.92842047	0.0222	0.0241	0.0234	0.0189	0.027	0.0472	0.0556	0.0498	0.0571	0.0981	0.041	0.0226	0.449781659	-0.273291925	shadows
-74.98933931	7.929599543	0.0375	0.0336	0.0438	0.0365	0.0637	0.1047	0.1261	0.1142	0.1332	0.1613	0.0999	0.0573	0.515593895	-0.39039666	shadows
-74.99768654	7.90517658	0.0455	0.0387	0.0456	0.032	0.0584	0.1177	0.1462	0.1439	0.1529	0.1588	0.0996	0.0554	0.636156907	-0.371900826	shadows
-74.95013488	8.007207638	0.0219	0.0374	0.0505	0.0442	0.0663	0.1244	0.147	0.1638	0.1532	0.1507	0.1037	0.0489	0.575	-0.345006485	shadows
-74.99941029	7.908794824	0.0461	0.0408	0.0433	0.0307	0.0542	0.1078	0.1352	0.1335	0.1422	0.1554	0.0928	0.0532	0.626065773	-0.363703159	shadows
-74.99097231	7.935388755	0.0229	0.0212	0.0271	0.0145	0.0355	0.0911	0.1163	0.1101	0.1221	0.1262	0.0592	0.0311	0.767255217	-0.371958285	shadows
-74.93508173	7.939092477	0.0151	0.019	0.0184	0.0209	0.0272	0.0458	0.0571	0.051	0.0631	0.067	0.0526	0.0371	0.418636996	-0.481690141	shadows
-74.97439335	7.525347901	0.0438	0.0457	0.0541	0.0439	0.0752	0.1476	0.1755	0.1724	0.1866	0.3172	0.1214	0.0665	0.594082293	-0.383475783	shadows
-74.93535411	7.937916594	0.0174	0.0221	0.022	0.0243	0.0283	0.0484	0.0603	0.0518	0.0642	0.0681	0.0516	0.0334	0.361366623	-0.402173913	shadows
-74.93589834	7.938911692	0.0172	0.0158	0.0189	0.0133	0.0282	0.0642	0.0795	0.0685	0.0834	0.0766	0.0537	0.0308	0.674816626	-0.479338843	shadows
-74.95159751	7.916118946	0.0294	0.028	0.0294	0.0357	0.0439	0.0579	0.068	0.0601	0.0672	0.0935	0.0704	0.0486	0.254697286	-0.410821643	shadows
-74.93661675	7.987305574	0.0138	0.0213	0.0285	0.012	0.0295	0.087	0.1116	0.1901	0.1113	0.1308	0.0542	0.0238	0.881246907	-0.31076179	shadows
-74.93616305	7.987215048	0.0146	0.0169	0.0196	0.0122	0.0228	0.0652	0.0909	0.0885	0.1003	0.114	0.042	0.0219	0.757696127	-0.363636364	shadows
-74.95214181	7.916661744	0.0262	0.0257	0.0277	0.0307	0.0447	0.0633	0.0748	0.0684	0.0814	0.0888	0.07	0.0468	0.380423814	-0.432958035	shadows
-74.95371248	7.658680193	0.029	0.0326	0.0341	0.0253	0.0434	0.0919	0.1188	0.1103	0.122	0.192	0.0703	0.0389	0.626843658	-0.346743295	shadows
-74.95205121	7.915576263	0.0269	0.0302	0.0321	0.0302	0.0436	0.0676	0.0779	0.0706	0.079	0.0966	0.0699	0.0405	0.400793651	-0.370588235	shadows
-74.91400713	7.616159313	0.0311	0.0341	0.0415	0.0299	0.0553	0.1228	0.1516	0.1466	0.1585	0.2183	0.0873	0.0497	0.661189802	-0.355590062	shadows
-74.93897565	7.989929139	0.0148	0.0164	0.0204	0.0108	0.0341	0.1127	0.1532	0.119	0.1582	0.181	0.0684	0.0306	0.833590139	-0.540540541	shadows
-74.93906655	7.988843686	0.0133	0.0164	0.0181	0.0107	0.024	0.061	0.0864	0.0943	0.0902	0.1334	0.0429	0.0196	0.796190476	-0.406557377	shadows
-74.98688983	7.922905739	0.0227	0.0231	0.0288	0.016	0.038	0.1067	0.1421	0.1408	0.1544	0.1934	0.0652	0.0301	0.795918367	-0.387234043	shadows
-74.98670838	7.922905734	0.0222	0.0219	0.0263	0.0146	0.0355	0.1005	0.135	0.1254	0.1409	0.1708	0.0631	0.0293	0.791428571	-0.41163311	shadows
-74.99886594	7.907709351	0.0439	0.0368	0.0384	0.028	0.0517	0.1108	0.1412	0.1342	0.1483	0.1469	0.0846	0.0472	0.654747226	-0.375609756	shadows
-74.93453744	7.938459201	0.0142	0.0171	0.0153	0.0201	0.0237	0.0261	0.0348	0.036	0.0403	0.0565	0.0493	0.0384	0.28342246	-0.526315789	shadows
-74.94805029	7.98685489	0.0147	0.0154	0.0169	0.0118	0.0214	0.0478	0.0634	0.0557	0.0663	0.0675	0.0367	0.0204	0.65037037	-0.369402985	shadows
-74.9708584	7.523357615	0.0361	0.0431	0.0492	0.0355	0.061	0.1186	0.1428	0.1409	0.1497	0.2454	0.0974	0.0552	0.597505669	-0.328785812	shadows
-74.95196023	7.917747194	0.0291	0.0229	0.039	0.0214	0.0503	0.134	0.1757	0.1858	0.1835	0.2312	0.0936	0.0473	0.793436293	-0.411764706	shadows
-74.97412142	7.525347886	0.0411	0.041	0.048	0.0324	0.0682	0.1521	0.1849	0.1792	0.2066	0.3131	0.1116	0.0571	0.693761815	-0.398496241	shadows
-74.95186975	7.915576243	0.0262	0.0296	0.0313	0.033	0.0435	0.0661	0.079	0.0713	0.0788	0.0946	0.0694	0.0426	0.367209971	-0.378351539	shadows
-74.95232318	7.917385412	0.026	0.0365	0.0464	0.0508	0.0625	0.09	0.1061	0.118	0.1058	0.1252	0.092	0.0519	0.398104265	-0.329479769	shadows
-74.93553571	7.937012065	0.0238	0.0241	0.027	0.0244	0.0361	0.0637	0.0782	0.0677	0.0795	0.1336	0.0588	0.0337	0.470141151	-0.370629371	shadows
-74.90406076	7.899647765	0.0126	0.0198	0.0248	0.017	0.0345	0.0722	0.09	0.0832	0.0949	0.0906	0.0535	0.0284	0.660678643	-0.366538953	shadows
-74.91411015	7.999784368	0.0276	0.0215	0.0291	0.0176	0.0499	0.1407	0.1808	0.1579	0.1959	0.2132	0.0833	0.0362	0.799430199	-0.482206406	shadows
-74.97076775	7.523538524	0.0373	0.0551	0.061	0.0438	0.0673	0.1321	0.1608	0.1684	0.1675	0.2579	0.1047	0.0592	0.587181904	-0.263729632	shadows
-74.91872305	7.608199998	0.0318	0.0353	0.0431	0.035	0.0544	0.0927	0.1096	0.105	0.1179	0.1585	0.0932	0.0584	0.5	-0.367571533	shadows
-74.95150679	7.916118936	0.03	0.0298	0.0294	0.034	0.0437	0.0569	0.0678	0.0626	0.0697	0.0961	0.0736	0.05	0.296066253	-0.429126214	shadows
-74.95271495	7.660036939	0.0278	0.0322	0.0366	0.0293	0.0467	0.0889	0.1068	0.0967	0.1162	0.166	0.0723	0.0443	0.534920635	-0.327823691	shadows
-74.90397004	7.899647745	0.0127	0.0181	0.023	0.0146	0.0322	0.0711	0.0887	0.0871	0.0928	0.0915	0.0523	0.0276	0.712881023	-0.389110226	shadows
-74.91890432	7.608471403	0.0366	0.041	0.0493	0.0427	0.0704	0.1123	0.1301	0.1182	0.1332	0.1933	0.1251	0.0728	0.46923555	-0.434633028	shadows
-74.99931956	7.908704368	0.0477	0.0408	0.0455	0.0354	0.0554	0.1095	0.1376	0.1247	0.1439	0.1502	0.0937	0.0529	0.55777639	-0.346264368	shadows
-74.94751553	7.910600644	0.0215	0.0213	0.0216	0.0138	0.0297	0.0766	0.1019	0.0799	0.1047	0.1165	0.0492	0.0245	0.705442903	-0.389830508	shadows
-74.97119517	7.904994681	0.0239	0.0301	0.0254	0.0227	0.0317	0.0579	0.0727	0.0632	0.0769	0.1015	0.0515	0.0323	0.471478463	-0.339401821	shadows
-74.94705138	7.992643918	0.0344	0.0266	0.0523	0.0302	0.1123	0.3	0.3725	0.2893	0.3955	0.3638	0.2027	0.098	0.810954617	-0.589803922	shadows
-74.97194618	7.522362653	0.0379	0.0434	0.0468	0.035	0.0643	0.1229	0.1465	0.1398	0.1539	0.236	0.0983	0.0557	0.599542334	-0.354927636	shadows
-74.93444672	7.938368731	0.014	0.0151	0.0136	0.0127	0.0209	0.0291	0.0376	0.0345	0.0427	0.0613	0.0455	0.0332	0.461864407	-0.539763113	shadows
-74.98933932	7.929418631	0.0382	0.0371	0.0447	0.0401	0.0667	0.11	0.1296	0.1167	0.136	0.1626	0.1016	0.0574	0.488520408	-0.388926863	shadows
-74.99795871	7.905538405	0.0432	0.0348	0.0441	0.0311	0.0552	0.1103	0.1381	0.1341	0.1471	0.1517	0.0891	0.0518	0.623486683	-0.337837838	shadows
-74.91881367	7.608380929	0.0345	0.0414	0.0482	0.0418	0.0624	0.0993	0.1174	0.1129	0.1169	0.1798	0.1087	0.0682	0.459599224	-0.385595921	shadows
-74.93553561	7.937645255	0.0177	0.0205	0.0239	0.0179	0.031	0.0627	0.0803	0.0702	0.0803	0.082	0.0536	0.0304	0.593643587	-0.383225806	shadows
-74.9533213	7.916209599	0.025	0.0247	0.0262	0.024	0.0338	0.0588	0.0729	0.0664	0.0762	0.0958	0.0583	0.0346	0.469026549	-0.379881657	shadows
-74.99795871	7.905357493	0.0441	0.0417	0.0451	0.0357	0.0568	0.1102	0.1404	0.13	0.1479	0.1543	0.0929	0.0542	0.569100785	-0.346376812	shadows
-74.93471897	7.938006951	0.0161	0.0212	0.018	0.0212	0.0255	0.03	0.0409	0.0373	0.0426	0.0555	0.0571	0.0416	0.275213675	-0.520639148	shadows
-74.94002765	7.612183582	0.0337	0.0385	0.0467	0.0291	0.0661	0.1561	0.1877	0.1786	0.2006	0.254	0.1063	0.0532	0.719788156	-0.389542484	shadows
-74.95168819	7.916571236	0.031	0.0289	0.0306	0.0372	0.0504	0.0569	0.0696	0.0591	0.0708	0.0991	0.0761	0.0531	0.22741433	-0.426429241	shadows
-74.9524139	7.917385422	0.0259	0.0325	0.0397	0.041	0.0584	0.0863	0.1035	0.1031	0.1052	0.1191	0.0887	0.0509	0.430950729	-0.381619938	shadows
-74.91890439	7.608109574	0.0325	0.0372	0.0429	0.0379	0.0542	0.09	0.1062	0.1011	0.1128	0.165	0.0941	0.0581	0.454676259	-0.373722628	shadows
-74.98661741	7.930413567	0.034	0.035	0.0431	0.0401	0.0583	0.096	0.1159	0.1085	0.1203	0.1707	0.0894	0.052	0.460296097	-0.349433962	shadows
-74.98707105	7.930594493	0.0303	0.0346	0.0488	0.0457	0.0693	0.1317	0.1618	0.1428	0.1731	0.1445	0.1029	0.0562	0.515119363	-0.356624918	shadows
-74.95196043	7.916028532	0.0267	0.0282	0.0301	0.0374	0.0461	0.0605	0.0733	0.0669	0.0733	0.0828	0.0712	0.0476	0.282837967	-0.405725568	shadows
-74.95186974	7.915666698	0.0264	0.0269	0.0312	0.0322	0.0433	0.0657	0.0801	0.0707	0.078	0.0921	0.0687	0.0429	0.37414966	-0.375375375	shadows
-74.93616304	7.987305504	0.0141	0.0152	0.0165	0.0105	0.0209	0.0604	0.0833	0.081	0.0897	0.1019	0.0383	0.0205	0.770491803	-0.397810219	shadows
-74.9866174	7.930594479	0.0348	0.0328	0.0403	0.0408	0.0628	0.1015	0.1232	0.1038	0.1237	0.178	0.0982	0.0564	0.435684647	-0.418050542	shadows
-74.99841232	7.907799806	0.0837	0.0358	0.0406	0.0306	0.0519	0.1036	0.1333	0.1311	0.1347	0.1725	0.0935	0.0539	0.621521336	-0.39448173	shadows
-74.95205118	7.915847631	0.0266	0.0238	0.0285	0.0241	0.0413	0.062	0.0755	0.0812	0.076	0.0855	0.0666	0.0426	0.542260209	-0.400630915	shadows
-74.98698055	7.923086654	0.0222	0.0242	0.0318	0.0142	0.0341	0.0963	0.1264	0.1506	0.1325	0.1853	0.0608	0.0283	0.827669903	-0.313174946	shadows
-74.93499105	7.93873064	0.0171	0.0216	0.0198	0.0231	0.0284	0.0372	0.0488	0.0418	0.0511	0.0571	0.056	0.0415	0.288135593	-0.477572559	shadows
-74.97028791	7.905265986	0.0243	0.0248	0.0269	0.017	0.0336	0.0776	0.096	0.0918	0.1003	0.1121	0.0535	0.0313	0.6875	-0.330845771	shadows
-74.97228383	7.905266123	0.0245	0.0214	0.0238	0.0158	0.0303	0.0726	0.0921	0.0806	0.0937	0.1291	0.0497	0.0294	0.67219917	-0.352380952	shadows
-74.97844781	8.0057628	0.0233	0.0272	0.0294	0.0218	0.0324	0.053	0.0614	0.0683	0.0613	0.069	0.0425	0.0255	0.51609323	-0.182197497	shadows
-74.93490054	7.937373789	0.018	0.0198	0.0195	0.0193	0.0269	0.0344	0.0429	0.0436	0.0471	0.0725	0.056	0.0386	0.386327504	-0.483443709	shadows
-74.93471889	7.938549685	0.0152	0.0184	0.0177	0.0223	0.0271	0.0294	0.0396	0.037	0.0439	0.0571	0.0534	0.0444	0.247892074	-0.502109705	shadows
-74.96974357	7.905175491	0.0274	0.0294	0.0322	0.0271	0.042	0.0736	0.0918	0.0916	0.0951	0.1262	0.0666	0.0407	0.543386689	-0.348178138	shadows
-74.93553562	7.937554799	0.0183	0.0201	0.0242	0.0187	0.0315	0.0635	0.079	0.0705	0.0827	0.0849	0.0546	0.0304	0.580717489	-0.385786802	shadows
-74.9896115	7.929418638	0.0414	0.0451	0.0552	0.0477	0.0725	0.1171	0.1426	0.1488	0.1511	0.1955	0.1194	0.066	0.514503817	-0.367697595	shadows
-74.97076775	7.523448066	0.0369	0.0512	0.0536	0.0386	0.0651	0.1269	0.1543	0.1569	0.1612	0.2539	0.1027	0.0585	0.60511509	-0.314139475	shadows
-74.94742472	7.911233824	0.0226	0.0215	0.025	0.0179	0.031	0.0625	0.0815	0.0672	0.0874	0.158	0.0548	0.0261	0.579318449	-0.373433584	shadows
-74.93526336	7.938007036	0.0174	0.0212	0.0197	0.0216	0.0282	0.0392	0.0474	0.0439	0.0536	0.0632	0.0522	0.0367	0.340458015	-0.45201669	shadows
-74.99741437	7.905176578	0.0477	0.0413	0.0486	0.0386	0.0638	0.1183	0.1455	0.135	0.1519	0.189	0.1092	0.0609	0.555299539	-0.384030418	shadows
-74.98652668	7.930323108	0.0347	0.0386	0.0464	0.0425	0.064	0.1113	0.1315	0.1268	0.1377	0.1794	0.0998	0.0561	0.497932664	-0.365253078	shadows
-74.95196046	7.915757165	0.0265	0.0276	0.0298	0.0276	0.042	0.0688	0.0861	0.0761	0.0802	0.0882	0.0668	0.0423	0.467695275	-0.383022774	shadows
-74.93453746	7.938368745	0.0145	0.0148	0.0156	0.0192	0.0242	0.0259	0.0333	0.0354	0.0392	0.0553	0.0502	0.0388	0.296703297	-0.525835866	shadows
-74.98652668	7.930413564	0.035	0.0388	0.0482	0.0418	0.0642	0.1064	0.1265	0.1236	0.1316	0.1836	0.0995	0.0572	0.494558646	-0.34732566	shadows
-74.9520512	7.915666719	0.0268	0.028	0.0308	0.0287	0.0418	0.0672	0.08	0.0735	0.0792	0.0929	0.0675	0.0406	0.438356164	-0.373346897	shadows
-74.93571717	7.937012093	0.0257	0.0237	0.0262	0.0191	0.0343	0.0731	0.0895	0.0827	0.0939	0.1547	0.0596	0.0331	0.62475442	-0.389277389	shadows
-74.95205122	7.915485808	0.027	0.0285	0.031	0.0294	0.0434	0.0644	0.0768	0.0706	0.0808	0.1003	0.0697	0.0415	0.412	-0.384309831	shadows
-74.93480966	7.938278332	0.0162	0.0218	0.0201	0.0224	0.0265	0.0313	0.04	0.0375	0.044	0.0548	0.0563	0.0432	0.252086811	-0.47382199	shadows
-74.95217098	7.659494137	0.0288	0.0309	0.0366	0.0275	0.0465	0.0896	0.1079	0.101	0.1144	0.1854	0.0749	0.0468	0.571984436	-0.343497758	shadows
-74.93453757	7.937645099	0.0158	0.0153	0.0162	0.0164	0.0244	0.0326	0.041	0.0402	0.0444	0.0582	0.0466	0.0324	0.4204947	-0.484076433	shadows
-74.91772573	7.608471181	0.032	0.0387	0.0415	0.0348	0.052	0.0935	0.1129	0.1156	0.1191	0.1538	0.0957	0.0578	0.537234043	-0.395043732	shadows
-74.97835707	8.005762796	0.0236	0.0281	0.0302	0.0205	0.0337	0.0592	0.0697	0.0848	0.0703	0.07	0.0442	0.0267	0.610636277	-0.188172043	shadows
-74.95141607	7.916028469	0.0298	0.0235	0.0276	0.0298	0.0417	0.055	0.067	0.0562	0.0724	0.097	0.0728	0.049	0.306976744	-0.450199203	shadows
-74.91411013	7.999874823	0.03	0.027	0.0376	0.0226	0.0532	0.1552	0.1921	0.1755	0.2102	0.2283	0.0926	0.0388	0.771832408	-0.422427035	shadows
-74.95208025	7.660036869	0.0306	0.0377	0.045	0.0427	0.055	0.0905	0.108	0.0999	0.1134	0.1798	0.0822	0.0509	0.40112202	-0.29245283	shadows
-74.93453738	7.938821024	0.013	0.0162	0.0128	0.0135	0.0208	0.0315	0.0418	0.0385	0.0463	0.0628	0.044	0.0319	0.480769231	-0.549295775	shadows
-74.90487818	7.895667894	0.0157	0.0196	0.0224	0.0125	0.0277	0.0776	0.1014	0.0907	0.1051	0.1201	0.0472	0.023	0.757751938	-0.356321839	shadows
-74.97119518	7.90481377	0.0246	0.0259	0.0246	0.0244	0.0329	0.047	0.0592	0.0477	0.0638	0.1079	0.0545	0.0364	0.323162275	-0.378002528	shadows
-74.9720368	7.522634031	0.0363	0.0435	0.0491	0.0439	0.063	0.1111	0.1345	0.123	0.1385	0.2329	0.0984	0.0578	0.473936489	-0.334237288	shadows
-74.98979296	7.929509098	0.0436	0.0387	0.0521	0.0462	0.088	0.1417	0.1689	0.1273	0.186	0.2397	0.1555	0.0909	0.467435159	-0.498073218	shadows
-74.94705137	7.992734374	0.035	0.0301	0.0551	0.0314	0.1187	0.3204	0.3927	0.3191	0.4132	0.3812	0.2146	0.1031	0.820827389	-0.591397849	shadows
-74.94959042	8.007026661	0.0226	0.021	0.0299	0.0191	0.0478	0.1145	0.1485	0.1324	0.1601	0.1526	0.0786	0.0434	0.747854785	-0.448847926	shadows
-74.97239939	7.522362681	0.0377	0.045	0.0598	0.0385	0.0747	0.1595	0.1893	0.1919	0.1985	0.26	0.119	0.0623	0.665798611	-0.331096197	shadows
-74.95217084	7.660760535	0.0431	0.0368	0.0425	0.0409	0.0537	0.0949	0.1139	0.1009	0.1213	0.1754	0.0831	0.0524	0.423131171	-0.323248408	shadows
-74.9548556	7.989840722	0.0212	0.0285	0.0371	0.0279	0.0518	0.1045	0.1264	0.1205	0.1295	0.144	0.0797	0.0418	0.623989218	-0.364726027	shadows
-74.96312003	7.913044623	0.0212	0.0247	0.0283	0.0203	0.0354	0.0688	0.0856	0.0806	0.0908	0.096	0.0583	0.0351	0.597621407	-0.346420323	shadows
-74.9536761	7.988483758	0.0198	0.0241	0.0248	0.0173	0.0303	0.0701	0.0909	0.0846	0.0916	0.1288	0.0503	0.0263	0.660451423	-0.33954727	shadows
-74.99922884	7.910513486	0.0419	0.0361	0.0422	0.0347	0.0516	0.1038	0.1299	0.1228	0.1356	0.1297	0.0892	0.053	0.559365079	-0.357686454	shadows
-74.93526346	7.937373846	0.0192	0.0234	0.0211	0.0233	0.0301	0.0435	0.0538	0.0445	0.055	0.0798	0.055	0.0373	0.312684366	-0.445466491	shadows
-74.93544491	7.93746433	0.0189	0.0247	0.0239	0.0251	0.0339	0.0594	0.0697	0.0628	0.076	0.084	0.0564	0.0327	0.428896473	-0.404732254	shadows
-74.95196044	7.915938077	0.0267	0.0265	0.0304	0.0306	0.0451	0.0615	0.0749	0.0714	0.0763	0.0824	0.071	0.0458	0.4	-0.400394477	shadows
-74.99922883	7.912232149	0.0394	0.0322	0.0383	0.0239	0.047	0.106	0.1345	0.1306	0.1432	0.1552	0.0771	0.0412	0.690614887	-0.336221837	shadows
-74.95196029	7.917204459	0.0271	0.0298	0.0374	0.0357	0.0551	0.0851	0.1059	0.0927	0.1062	0.127	0.0882	0.0479	0.443925234	-0.404458599	shadows
-74.93634445	7.987757809	0.0115	0.016	0.015	0.0094	0.0182	0.052	0.0734	0.0719	0.0728	0.063	0.0335	0.0179	0.768757688	-0.381443299	shadows
-74.95214182	7.916571288	0.0261	0.0266	0.0278	0.03	0.043	0.0618	0.0738	0.0655	0.0774	0.0861	0.0697	0.0465	0.371727749	-0.42974359	shadows
-74.93589823	7.939635338	0.0175	0.0199	0.0222	0.016	0.0323	0.0765	0.0953	0.0843	0.0994	0.0959	0.0571	0.0322	0.680957129	-0.440100883	shadows
-74.95476486	7.989840712	0.0212	0.0255	0.0356	0.0244	0.0508	0.1033	0.1237	0.1204	0.1278	0.1365	0.0779	0.041	0.662983425	-0.372687225	shadows
-74.90857521	7.997612249	0.0208	0.0187	0.0271	0.0149	0.0407	0.1071	0.1459	0.1029	0.1577	0.2318	0.0722	0.0337	0.747028862	-0.454179255	shadows
-74.95205096	7.917747204	0.0288	0.0227	0.0321	0.0178	0.0512	0.1316	0.1714	0.1708	0.1905	0.219	0.0986	0.0517	0.811240721	-0.508798776	shadows
-74.97844783	8.005491434	0.0255	0.0469	0.0547	0.0386	0.0433	0.0701	0.0785	0.1394	0.0747	0.0789	0.0578	0.0304	0.566292135	-0.027555556	shadows
-74.98634544	7.923719825	0.0176	0.0186	0.0225	0.013	0.0263	0.0749	0.1023	0.0977	0.1012	0.1087	0.0489	0.0261	0.765130985	-0.369747899	shadows
-74.95186972	7.91584761	0.0268	0.0271	0.0308	0.0318	0.0444	0.0639	0.0782	0.0731	0.0767	0.087	0.0696	0.0448	0.393708294	-0.386454183	shadows
-74.97076777	7.523176694	0.0357	0.0422	0.0478	0.0359	0.0602	0.1167	0.1404	0.1389	0.1475	0.242	0.0975	0.0565	0.589244851	-0.342050929	shadows
-74.97203681	7.522453116	0.0374	0.0435	0.0505	0.041	0.0644	0.1222	0.1464	0.139	0.1514	0.2337	0.1005	0.0574	0.544444444	-0.331125828	shadows
-74.94760629	7.910329288	0.023	0.0226	0.0261	0.0159	0.03	0.0679	0.0907	0.0793	0.0951	0.132	0.0465	0.0275	0.665966387	-0.280991736	shadows
-74.97745192	7.963610437	0.0164	0.0195	0.0178	0.0109	0.0219	0.0597	0.0792	0.0715	0.0837	0.085	0.0412	0.0224	0.735436893	-0.396610169	shadows
-74.90270073	7.896210128	0.0186	0.0305	0.0335	0.0347	0.0392	0.0608	0.0759	0.0609	0.0809	0.1073	0.0542	0.0337	0.274058577	-0.236031927	shadows
-74.91582206	7.607475787	0.0358	0.034	0.0409	0.0318	0.0534	0.0999	0.1216	0.1141	0.1275	0.2109	0.0896	0.0538	0.56408499	-0.373180077	shadows
-74.97074152	7.905356474	0.0235	0.0211	0.0243	0.0165	0.0311	0.0761	0.1016	0.0829	0.1057	0.1069	0.0534	0.0312	0.668008048	-0.374517375	shadows
-74.99814016	7.906081142	0.0431	0.0393	0.0461	0.0358	0.0585	0.118	0.1462	0.138	0.156	0.158	0.1011	0.0567	0.588032221	-0.373641304	shadows
-74.96411805	7.912592431	0.0222	0.0267	0.028	0.0208	0.0341	0.0728	0.0885	0.0807	0.0923	0.0989	0.0572	0.0312	0.590147783	-0.342723005	shadows
-74.9358079	7.937012107	0.027	0.0214	0.0272	0.0194	0.0323	0.0773	0.0961	0.0878	0.1012	0.1746	0.0595	0.0323	0.638059701	-0.37254902	shadows
-74.93589821	7.939725794	0.0175	0.0187	0.0236	0.0149	0.0329	0.0771	0.0983	0.0866	0.1031	0.0996	0.057	0.0327	0.706403941	-0.41439206	shadows
-74.97258065	7.52281498	0.0356	0.0371	0.0509	0.035	0.0612	0.1348	0.1641	0.1546	0.1743	0.2743	0.0958	0.0516	0.630801688	-0.306066803	shadows
-74.9294621	7.905532456	0.0269	0.0238	0.0291	0.0281	0.0391	0.0413	0.0499	0.0435	0.051	0.0833	0.0356	0.0211	0.215083799	-0.100463679	shadows
-74.98698055	7.92317711	0.0218	0.0203	0.0268	0.0142	0.0311	0.0855	0.1132	0.1164	0.1145	0.1774	0.0567	0.0267	0.782542113	-0.358083832	shadows
-74.90415159	7.899195507	0.013	0.0219	0.0244	0.0177	0.0322	0.0616	0.0787	0.0708	0.0823	0.0856	0.0559	0.0309	0.6	-0.392278954	shadows
-74.90478743	7.895758329	0.0145	0.0183	0.02	0.014	0.0289	0.0744	0.1032	0.0903	0.1062	0.1096	0.0452	0.0232	0.731543624	-0.386503067	shadows
-74.9459633	7.986311889	0.0208	0.0174	0.0209	0.0199	0.0227	0.0289	0.0388	0.0264	0.0515	0.1125	0.0315	0.0213	0.140388769	-0.202290076	shadows
-74.97421206	7.525438348	0.042	0.0433	0.054	0.0367	0.0778	0.1692	0.2054	0.1998	0.2191	0.3145	0.1264	0.0644	0.689640592	-0.401330377	shadows
-74.97131164	7.522905357	0.0346	0.0417	0.0459	0.0361	0.0552	0.1109	0.1332	0.1266	0.1421	0.2266	0.0893	0.0514	0.556238476	-0.321005917	shadows
-74.97717982	7.961529941	0.0203	0.0195	0.0227	0.0116	0.0276	0.0768	0.1045	0.1034	0.1086	0.1179	0.0466	0.0242	0.79826087	-0.344877345	shadows
-74.97439336	7.525166986	0.0435	0.0445	0.0522	0.0408	0.0701	0.1476	0.1821	0.1714	0.1932	0.3147	0.115	0.0647	0.615457116	-0.375598086	shadows
-74.95358535	7.988574204	0.0194	0.0229	0.0269	0.0207	0.0322	0.0723	0.0934	0.0814	0.096	0.1131	0.0527	0.0272	0.594515181	-0.324120603	shadows
-74.94696064	7.992643907	0.034	0.0236	0.0368	0.0212	0.09	0.2552	0.3303	0.2053	0.3585	0.3512	0.1669	0.0795	0.812803532	-0.63868434	shadows
-74.99941029	7.910784854	0.0399	0.0347	0.0374	0.0299	0.047	0.0948	0.1191	0.1139	0.1256	0.1336	0.0818	0.0474	0.584144645	-0.372483221	shadows
-74.97246525	7.905808871	0.025	0.0247	0.0271	0.0175	0.0419	0.114	0.1608	0.1008	0.17	0.183	0.072	0.0389	0.704142012	-0.453077699	shadows
-74.90261003	7.896119651	0.021	0.0427	0.047	0.0533	0.0452	0.0674	0.079	0.0789	0.0805	0.1155	0.0578	0.037	0.193645991	-0.103053435	shadows
-74.96420877	7.912592439	0.0221	0.0266	0.027	0.0198	0.0332	0.0706	0.0883	0.0783	0.0931	0.0998	0.0558	0.0304	0.596330275	-0.347826087	shadows
-74.98652669	7.930051741	0.0335	0.0338	0.0425	0.0327	0.0637	0.1168	0.1412	0.1231	0.1493	0.1667	0.0986	0.0538	0.580231065	-0.397590361	shadows
-74.98716179	7.930142216	0.0297	0.0327	0.0386	0.0304	0.0565	0.1048	0.128	0.1075	0.1358	0.151	0.0869	0.0498	0.559100798	-0.384860558	shadows
-74.95177899	7.915938056	0.0274	0.028	0.029	0.0343	0.0466	0.0634	0.0752	0.0633	0.0763	0.0867	0.0713	0.047	0.297131148	-0.421734796	shadows
-74.96420879	7.912411527	0.0229	0.0276	0.029	0.0234	0.0357	0.0699	0.0854	0.0813	0.0913	0.1035	0.0584	0.0321	0.553008596	-0.336384439	shadows
-74.99042793	7.935298287	0.0301	0.0245	0.0327	0.0241	0.0484	0.1017	0.129	0.1002	0.1343	0.1388	0.0803	0.0446	0.612228479	-0.421238938	shadows
-74.95186961	7.916842625	0.029	0.0295	0.0305	0.0435	0.0554	0.0721	0.0899	0.0629	0.0932	0.102	0.0864	0.0549	0.182330827	-0.478186484	shadows
-74.90397046	7.897838627	0.0102	0.0126	0.0149	0.0088	0.0201	0.0499	0.0665	0.0648	0.0691	0.0765	0.0384	0.0211	0.760869565	-0.440900563	shadows
-74.93435584	7.93936373	0.0166	0.0088	0.0104	0.0073	0.0185	0.0538	0.0782	0.0689	0.0827	0.0943	0.038	0.023	0.80839895	-0.570247934	shadows
-74.9515976	7.915395299	0.0247	0.0264	0.0274	0.0313	0.04	0.056	0.0658	0.0593	0.0678	0.0987	0.0648	0.0447	0.309050773	-0.405639913	shadows
-74.94659855	7.985859694	0.0132	0.0171	0.0189	0.0145	0.0249	0.0515	0.0641	0.0569	0.0664	0.0577	0.0453	0.0259	0.593837535	-0.411214953	shadows
-74.95214183	7.916480833	0.0261	0.0269	0.0279	0.0327	0.0414	0.0603	0.0729	0.0642	0.0735	0.0835	0.0695	0.0462	0.325077399	-0.427104723	shadows
-74.97155809	7.904632883	0.0256	0.0272	0.027	0.0273	0.0333	0.0538	0.0648	0.0552	0.0693	0.1251	0.0563	0.0385	0.338181818	-0.351740696	shadows
-74.93553564	7.937464344	0.019	0.0207	0.0245	0.0192	0.0321	0.0642	0.0778	0.0702	0.0852	0.0879	0.0557	0.0304	0.570469799	-0.389027431	shadows
-74.95253368	7.65940372	0.0286	0.0346	0.038	0.0323	0.0469	0.0871	0.1017	0.1	0.1109	0.1838	0.0761	0.0474	0.511715797	-0.333917616	shadows
-74.98970223	7.929509096	0.0419	0.0403	0.0515	0.0461	0.0694	0.1081	0.1356	0.1288	0.1464	0.2128	0.1187	0.0671	0.472841624	-0.394829612	shadows
-74.98734345	7.923448489	0.0233	0.0236	0.0327	0.0148	0.0415	0.126	0.1635	0.165	0.1793	0.2241	0.0752	0.0341	0.835372636	-0.393883225	shadows
-74.95159753	7.915938035	0.0282	0.0278	0.0289	0.0319	0.0434	0.059	0.0679	0.0597	0.0673	0.091	0.0687	0.0465	0.30349345	-0.407786885	shadows
-74.98933932	7.929237719	0.0408	0.0421	0.0528	0.0436	0.0732	0.1248	0.1466	0.1463	0.1527	0.1839	0.1169	0.0626	0.540810953	-0.377725398	shadows
-74.95244293	7.660127366	0.0287	0.0339	0.0365	0.0308	0.0484	0.0892	0.1089	0.0966	0.1123	0.1604	0.0744	0.0463	0.516483516	-0.341749324	shadows
-74.98943004	7.929599545	0.0384	0.0331	0.0438	0.0371	0.0658	0.1085	0.1318	0.1156	0.1416	0.1664	0.1052	0.0603	0.514079895	-0.412080537	shadows
-74.99777726	7.905809772	0.0427	0.0328	0.0411	0.0308	0.0558	0.1056	0.1327	0.126	0.1407	0.1492	0.0951	0.0549	0.607142857	-0.396475771	shadows
-74.90658114	7.577803947	0.0286	0.035	0.0434	0.0289	0.0553	0.1126	0.1338	0.1258	0.1406	0.2279	0.0819	0.0446	0.626373626	-0.30726257	shadows
-74.90478748	7.895577418	0.0156	0.0192	0.02	0.0144	0.0285	0.0774	0.1079	0.1002	0.1111	0.1173	0.0476	0.0234	0.748691099	-0.408284024	shadows
-74.93508171	7.939182932	0.0144	0.0164	0.0152	0.0172	0.0242	0.0474	0.0618	0.0472	0.0669	0.0696	0.0485	0.0316	0.465838509	-0.522762951	shadows
-74.9529869	7.660670168	0.0268	0.0324	0.0334	0.0251	0.0432	0.0997	0.1296	0.1263	0.1384	0.1443	0.0725	0.0415	0.668428005	-0.369216242	shadows
-74.97835706	8.005853251	0.0229	0.0252	0.0281	0.0195	0.0318	0.0546	0.0664	0.0749	0.0683	0.0666	0.0413	0.026	0.586864407	-0.190201729	shadows
-74.99804943	7.907166613	0.0658	0.0363	0.0412	0.0379	0.0532	0.098	0.1227	0.1066	0.1279	0.1588	0.0948	0.0578	0.475432526	-0.394117647	shadows
-74.93897589	7.988300939	0.0144	0.0179	0.0182	0.01	0.0346	0.1001	0.1349	0.0919	0.138	0.1213	0.0607	0.0297	0.803729146	-0.538656527	shadows
-74.98688977	7.924805313	0.0222	0.0191	0.0246	0.0143	0.0375	0.0986	0.1299	0.1138	0.1381	0.1437	0.0642	0.033	0.776736924	-0.445945946	shadows
-74.98635363	7.670894154	0.0386	0.0362	0.0399	0.0285	0.0571	0.1468	0.1923	0.1512	0.206	0.2236	0.0924	0.0457	0.682804674	-0.396825397	shadows
-74.97583649	7.653435495	0.0322	0.031	0.0389	0.0276	0.0535	0.1388	0.1702	0.1574	0.1814	0.1824	0.0945	0.0466	0.701621622	-0.416791604	shadows
-74.95259541	7.916933164	0.0237	0.0251	0.0297	0.0252	0.0413	0.0676	0.0806	0.075	0.0852	0.0875	0.0704	0.0418	0.497005988	-0.406593407	shadows
-74.93499098	7.939182918	0.0139	0.0165	0.0165	0.0179	0.0231	0.0435	0.0581	0.0445	0.063	0.0704	0.0471	0.0312	0.426282051	-0.481132075	shadows
-74.93570916	7.9883909	0.0118	0.0143	0.0145	0.0094	0.0165	0.0479	0.0675	0.0706	0.0677	0.0624	0.0347	0.0179	0.765	-0.410569106	shadows
-74.97430271	7.525257439	0.0423	0.0434	0.0516	0.039	0.0711	0.1486	0.1803	0.171	0.1891	0.3111	0.1153	0.0631	0.628571429	-0.381665668	shadows
-74.96311995	7.913858727	0.028	0.0268	0.0338	0.025	0.0458	0.0898	0.1107	0.0966	0.1203	0.1486	0.075	0.0415	0.588815789	-0.378676471	shadows
-74.98571891	7.671075047	0.0356	0.0368	0.0471	0.0298	0.0689	0.163	0.204	0.1685	0.2168	0.2235	0.1013	0.0477	0.699445285	-0.365229111	shadows
-74.9484131	7.988121313	0.0239	0.0262	0.039	0.0272	0.0715	0.1775	0.2207	0.1499	0.2326	0.2141	0.1185	0.0684	0.69282891	-0.504761905	shadows
-74.93888501	7.989205481	0.0117	0.0118	0.0147	0.0095	0.0211	0.0598	0.0856	0.0812	0.0948	0.106	0.0448	0.0216	0.790518192	-0.505882353	shadows
-74.9347189	7.93845923	0.0154	0.0199	0.017	0.0214	0.0272	0.0301	0.0403	0.0384	0.0436	0.0563	0.0545	0.0444	0.284280936	-0.524475524	shadows
-74.94768741	7.9861312	0.0148	0.0148	0.0186	0.0123	0.0208	0.0403	0.0514	0.057	0.0583	0.0554	0.0337	0.0189	0.645021645	-0.288718929	shadows
-74.90388034	7.895215387	0.0179	0.0184	0.0216	0.0132	0.0291	0.0814	0.1063	0.0831	0.1164	0.1242	0.0494	0.0254	0.725856698	-0.391549296	shadows
-74.97164882	7.904542433	0.0261	0.027	0.0272	0.0229	0.0335	0.0652	0.0784	0.0856	0.0836	0.1371	0.0568	0.0372	0.577880184	-0.352380952	shadows
-74.9896115	7.929328182	0.0425	0.0423	0.0536	0.0493	0.0768	0.1255	0.1505	0.1485	0.1596	0.205	0.1275	0.0697	0.501516684	-0.408061844	shadows
-74.98716179	7.930232672	0.0296	0.0324	0.0394	0.0326	0.0557	0.0972	0.1166	0.1099	0.1243	0.1493	0.0861	0.0499	0.54245614	-0.372111554	shadows
-74.98661756	7.925709863	0.0271	0.0224	0.0301	0.0183	0.0557	0.1207	0.1599	0.1174	0.1816	0.1887	0.1004	0.0565	0.730287399	-0.538697318	shadows
-74.95271499	7.659675111	0.0282	0.0343	0.0372	0.0325	0.0469	0.0787	0.098	0.0895	0.1022	0.1837	0.0748	0.0474	0.467213115	-0.335714286	shadows
-74.91654715	7.608470956	0.0294	0.0353	0.0386	0.0299	0.0482	0.0925	0.1132	0.107	0.1188	0.1262	0.0845	0.0496	0.563184806	-0.372867587	shadows
-74.98943004	7.929418633	0.039	0.0386	0.0514	0.0456	0.0691	0.114	0.1357	0.1322	0.1413	0.1663	0.107	0.0597	0.487064117	-0.351010101	shadows
-74.91881369	7.608290472	0.0334	0.0408	0.046	0.0412	0.0593	0.0955	0.1122	0.107	0.1157	0.1721	0.1028	0.065	0.443994602	-0.38172043	shadows
-74.93462826	7.937916481	0.0158	0.0181	0.0165	0.0188	0.0238	0.031	0.0386	0.0402	0.0428	0.056	0.0521	0.0382	0.362711864	-0.518950437	shadows
-74.95205107	7.91675219	0.0268	0.0264	0.0299	0.0397	0.0495	0.0687	0.0842	0.0657	0.0889	0.093	0.0787	0.0506	0.246679317	-0.449355433	shadows
-74.93652587	7.988210115	0.01	0.0125	0.0111	0.0071	0.0149	0.0407	0.061	0.058	0.0631	0.0574	0.0329	0.0185	0.78187404	-0.495454545	shadows
-74.94832235	7.988121302	0.0241	0.0238	0.0345	0.0275	0.0693	0.1736	0.2125	0.124	0.217	0.2119	0.1149	0.066	0.636963696	-0.53815261	shadows
-74.99913811	7.909156647	0.045	0.039	0.0422	0.0302	0.0528	0.1019	0.1264	0.1191	0.1327	0.1348	0.0913	0.0522	0.595445412	-0.367790262	shadows
-74.9518697	7.916028522	0.0272	0.0299	0.0312	0.038	0.0468	0.0613	0.0739	0.0691	0.075	0.0852	0.0718	0.0479	0.29038282	-0.394174757	shadows
-74.93915712	7.990019621	0.0169	0.0205	0.0304	0.0122	0.0423	0.1281	0.1704	0.2018	0.177	0.2181	0.081	0.0359	0.885981308	-0.454219031	shadows
-74.92946204	7.905894279	0.0277	0.027	0.0332	0.0289	0.0325	0.0331	0.0395	0.0357	0.0392	0.1089	0.032	0.0189	0.105263158	0.018404908	shadows
-74.93526343	7.937554757	0.0185	0.0206	0.0209	0.0216	0.0305	0.046	0.0566	0.0494	0.0581	0.0726	0.0558	0.0363	0.391549296	-0.455019557	shadows
-74.95095173	8.006122271	0.0181	0.0194	0.0286	0.0134	0.0329	0.0951	0.1232	0.1588	0.1263	0.1341	0.0587	0.0258	0.844367015	-0.344788087	shadows
-74.9918796	7.936021964	0.0227	0.0205	0.0247	0.0151	0.0319	0.0869	0.1175	0.1079	0.1239	0.1504	0.0585	0.0293	0.754471545	-0.40625	shadows
-74.90757828	7.578075532	0.0285	0.0309	0.0399	0.0259	0.0545	0.1158	0.1444	0.131	0.1538	0.2231	0.0788	0.0437	0.66985341	-0.327716933	shadows
-74.91890437	7.608200032	0.033	0.0406	0.0448	0.0395	0.0569	0.0927	0.1092	0.1033	0.1159	0.1682	0.0988	0.0614	0.446778711	-0.376044568	shadows
-74.98643595	7.930323105	0.0357	0.0389	0.0495	0.0408	0.068	0.12	0.1395	0.1378	0.1466	0.1917	0.107	0.0595	0.543113102	-0.367412141	shadows
-74.9038793	7.89973818	0.0135	0.019	0.0229	0.0137	0.0319	0.0715	0.0874	0.0879	0.093	0.0973	0.0526	0.0275	0.730314961	-0.393377483	shadows
-74.95323058	7.916209588	0.0243	0.0258	0.0261	0.0249	0.0336	0.0573	0.07	0.0618	0.0738	0.0903	0.0594	0.0352	0.425605536	-0.389473684	shadows
-74.95253357	7.660398747	0.0281	0.0326	0.0361	0.0292	0.0448	0.0898	0.1181	0.104	0.1196	0.1397	0.072	0.0433	0.561561562	-0.332099907	shadows
-74.95168826	7.915938045	0.0278	0.0259	0.0298	0.035	0.045	0.0612	0.0715	0.0606	0.0718	0.0888	0.07	0.0467	0.267782427	-0.402805611	shadows
-74.96974356	7.905265947	0.027	0.0297	0.032	0.0261	0.0409	0.0667	0.0848	0.0825	0.0896	0.1238	0.0638	0.0399	0.519337017	-0.331941545	shadows
-74.93535402	7.938459329	0.0171	0.0167	0.0184	0.0145	0.0243	0.049	0.0647	0.0634	0.069	0.0616	0.0477	0.0304	0.627727856	-0.443267776	shadows
-74.91600319	7.608470851	0.0314	0.0337	0.0432	0.03	0.0509	0.0995	0.1179	0.1156	0.1237	0.1467	0.0889	0.0517	0.587912088	-0.345950038	shadows
-74.9529584	7.916209558	0.0232	0.0246	0.0255	0.0257	0.0341	0.0527	0.0641	0.054	0.068	0.0793	0.0607	0.0386	0.355081556	-0.408352668	shadows
-74.97872218	7.964695973	0.0174	0.0154	0.0179	0.0102	0.0249	0.0753	0.1019	0.09	0.1086	0.1218	0.0494	0.0248	0.796407186	-0.468053492	shadows
-74.94805028	7.986945345	0.0146	0.0156	0.0181	0.0111	0.0225	0.0516	0.0677	0.0618	0.0708	0.0704	0.0388	0.0209	0.695473251	-0.363796134	shadows
-74.93471909	7.937283305	0.0172	0.023	0.0211	0.0205	0.0264	0.0354	0.0459	0.0432	0.0486	0.0772	0.0522	0.0371	0.356357928	-0.424283765	shadows
-74.9979587	7.907166612	0.0715	0.037	0.0417	0.0392	0.0563	0.1022	0.1271	0.1086	0.1332	0.166	0.1001	0.0615	0.469553451	-0.411847673	shadows
-74.93453747	7.93827829	0.0147	0.0158	0.0154	0.0182	0.0233	0.026	0.0336	0.0334	0.0386	0.0542	0.0499	0.0383	0.294573643	-0.528330781	shadows
-74.99741437	7.905086122	0.0481	0.0422	0.0511	0.0454	0.0643	0.1178	0.1451	0.1326	0.1512	0.1923	0.1084	0.0597	0.48988764	-0.359247649	shadows
-74.98988354	7.93538873	0.0464	0.0295	0.0333	0.0227	0.0422	0.1009	0.1271	0.1173	0.1338	0.1807	0.0822	0.0547	0.675714286	-0.423376623	shadows
-74.95286757	7.917114106	0.023	0.0246	0.0289	0.0249	0.0421	0.065	0.0804	0.0747	0.0843	0.0904	0.0734	0.0426	0.5	-0.434995112	shadows
-74.9354448	7.938187976	0.0164	0.015	0.0165	0.0109	0.0216	0.0554	0.0771	0.064	0.0783	0.0655	0.0431	0.0246	0.70894526	-0.446308725	shadows
-74.97173952	7.904904263	0.0239	0.023	0.0232	0.019	0.0278	0.057	0.0747	0.0587	0.0781	0.1156	0.0475	0.0314	0.510939511	-0.343705799	shadows
-74.90406085	7.899285942	0.0121	0.0267	0.0259	0.0223	0.0329	0.061	0.0776	0.0728	0.082	0.0847	0.0571	0.0331	0.531019979	-0.375903614	shadows
-74.97249	7.522814975	0.0355	0.0393	0.0521	0.0367	0.0612	0.13	0.1548	0.1471	0.1654	0.2661	0.0953	0.0521	0.600652884	-0.293080054	shadows
-74.98634522	7.930232646	0.0363	0.0316	0.0462	0.0281	0.0658	0.1334	0.1603	0.1722	0.1682	0.1986	0.1104	0.059	0.719420869	-0.409961686	shadows
-74.9189044	7.608019117	0.032	0.0352	0.0411	0.0357	0.0514	0.0873	0.1032	0.0952	0.1097	0.1617	0.0895	0.0548	0.454545455	-0.370597243	shadows
-74.95259542	7.916842708	0.0236	0.024	0.0292	0.0237	0.0394	0.064	0.0764	0.0723	0.0812	0.086	0.0659	0.0407	0.50625	-0.385909569	shadows
-74.95244301	7.65940371	0.0286	0.0365	0.041	0.0386	0.0489	0.087	0.1048	0.1012	0.1113	0.1842	0.0767	0.0477	0.447782546	-0.303313509	shadows
-74.95241389	7.917475878	0.0261	0.0297	0.0372	0.0406	0.0611	0.0928	0.1118	0.0914	0.1132	0.1258	0.0974	0.0555	0.384848485	-0.447251114	shadows
-74.97127861	8.009561495	0.0553	0.0495	0.0554	0.0504	0.0565	0.0743	0.0886	0.0703	0.0898	0.1154	0.0669	0.0446	0.164871582	-0.094031071	shadows
-74.90261001	7.896210107	0.0197	0.0246	0.0292	0.0294	0.0412	0.0577	0.0688	0.0525	0.0749	0.1141	0.0539	0.0352	0.282051282	-0.29723225	shadows
-74.93526342	7.937645213	0.0182	0.0207	0.0239	0.0201	0.0304	0.0478	0.0594	0.0509	0.0596	0.0689	0.0558	0.0366	0.433802817	-0.400250941	shadows
-74.97228384	7.905175667	0.0249	0.0228	0.0243	0.016	0.0294	0.0726	0.094	0.0833	0.0957	0.1287	0.0498	0.0292	0.677744209	-0.344129555	shadows
-74.99913811	7.909066191	0.0459	0.0393	0.0435	0.0324	0.055	0.1067	0.1332	0.1308	0.1407	0.1378	0.0933	0.0533	0.602941176	-0.364035088	shadows
-74.93499104	7.938821095	0.0165	0.0207	0.0203	0.0221	0.0284	0.0392	0.0502	0.0418	0.0526	0.0598	0.0552	0.0416	0.30829421	-0.462251656	shadows
-74.98661742	7.929961288	0.0342	0.0336	0.0417	0.0332	0.0627	0.1071	0.132	0.1198	0.1398	0.1779	0.0945	0.0524	0.566013072	-0.387665198	shadows
-74.95189903	7.658951365	0.03	0.0322	0.0372	0.0289	0.0479	0.094	0.1162	0.1099	0.1225	0.1985	0.0741	0.0446	0.583573487	-0.331536388	shadows
-74.91881371	7.608200015	0.0323	0.0403	0.0439	0.0399	0.0563	0.0917	0.1071	0.1001	0.1146	0.1645	0.0969	0.0618	0.43	-0.376420455	shadows
-74.93779598	7.990019419	0.0355	0.0127	0.0166	0.0095	0.0264	0.0658	0.0953	0.0692	0.1096	0.1541	0.0584	0.0391	0.758576874	-0.557333333	shadows
-74.94732463	7.984683864	0.0208	0.0177	0.0209	0.0147	0.0275	0.0599	0.0723	0.0702	0.0729	0.1407	0.0455	0.0246	0.653710247	-0.370481928	shadows
-74.97239936	7.522905427	0.035	0.0399	0.0477	0.035	0.059	0.1243	0.1511	0.1398	0.1596	0.2574	0.0925	0.0517	0.599542334	-0.319543509	shadows
-74.98661742	7.930051743	0.0325	0.0351	0.0448	0.036	0.0648	0.1136	0.1412	0.1177	0.1473	0.1562	0.0969	0.0535	0.531554977	-0.367678193	shadows
-74.93517247	7.939002035	0.0159	0.0182	0.0198	0.0179	0.0281	0.046	0.0569	0.0557	0.0609	0.0653	0.0538	0.0394	0.513586957	-0.461956522	shadows
-74.95380315	7.658680203	0.0295	0.0318	0.0351	0.0245	0.0435	0.0944	0.1221	0.107	0.1245	0.195	0.0711	0.0389	0.627376426	-0.338983051	shadows
-74.95196045	7.915847621	0.0266	0.0255	0.03	0.0255	0.0435	0.0651	0.0805	0.0764	0.0782	0.0853	0.0689	0.044	0.499509323	-0.393326593	shadows
-74.95205106	7.916842646	0.0269	0.0278	0.0293	0.0374	0.0529	0.0759	0.095	0.0725	0.0984	0.0959	0.0858	0.0524	0.319381256	-0.490877498	shadows
-74.99941029	7.908975735	0.0453	0.04	0.0432	0.0323	0.0546	0.1092	0.1352	0.1208	0.1412	0.1456	0.0936	0.0545	0.57805356	-0.368421053	shadows
-74.91636585	7.608380464	0.0296	0.0321	0.0381	0.0263	0.0465	0.0941	0.1174	0.1174	0.125	0.1276	0.0805	0.0471	0.633959638	-0.357504216	shadows
-74.97212743	7.522905409	0.0345	0.0389	0.0455	0.0329	0.0581	0.1155	0.1383	0.135	0.1489	0.2328	0.0926	0.0524	0.60810006	-0.341057205	shadows
-74.95086083	8.007388636	0.0212	0.0233	0.0295	0.0253	0.0479	0.0875	0.1137	0.0923	0.1227	0.1486	0.0796	0.0435	0.569727891	-0.459211732	shadows
-74.97194617	7.52245311	0.0374	0.0428	0.0484	0.0396	0.0648	0.1159	0.138	0.133	0.1457	0.2335	0.0988	0.0568	0.541135574	-0.342391304	shadows
-74.94832262	7.986040824	0.0161	0.0157	0.0171	0.0121	0.022	0.0456	0.0578	0.055	0.063	0.0771	0.0326	0.0176	0.639344262	-0.311871227	shadows
-74.99841231	7.910332572	0.0477	0.0355	0.0413	0.0321	0.0555	0.1065	0.1308	0.1212	0.1375	0.1436	0.0924	0.0555	0.581213307	-0.382198953	shadows
-74.93561839	7.988571797	0.0127	0.0156	0.014	0.0093	0.0178	0.0504	0.0657	0.0653	0.0713	0.0667	0.0347	0.0188	0.750670241	-0.425051335	shadows
-74.97790564	7.962886816	0.0205	0.0232	0.0213	0.0193	0.027	0.0548	0.0704	0.0482	0.0725	0.082	0.0498	0.0318	0.428148148	-0.400843882	shadows
-74.97122099	7.523086266	0.0342	0.0381	0.0431	0.0293	0.0537	0.1123	0.1336	0.1345	0.1447	0.2267	0.0863	0.0481	0.642246642	-0.333848532	shadows
-74.95289628	7.660127416	0.0273	0.0337	0.0376	0.0284	0.0447	0.0922	0.1174	0.106	0.1266	0.1641	0.0708	0.0442	0.577380952	-0.306273063	shadows
-74.96302935	7.91250188	0.0252	0.0266	0.0307	0.0211	0.0364	0.0697	0.0867	0.0804	0.0924	0.1021	0.0592	0.0372	0.584236453	-0.31701891	shadows
-74.94959041	8.007117117	0.0233	0.0229	0.0348	0.0219	0.0499	0.1062	0.1345	0.1313	0.1467	0.1559	0.0796	0.0475	0.714099217	-0.391608392	shadows
-74.97230875	7.522362676	0.0377	0.0462	0.0587	0.0397	0.0721	0.1506	0.1793	0.183	0.1843	0.252	0.1135	0.0608	0.643466547	-0.318234611	shadows
-74.951779	7.9158476	0.0271	0.0278	0.0298	0.0322	0.0454	0.0627	0.0759	0.0621	0.0752	0.0888	0.0703	0.0456	0.317073171	-0.404595405	shadows
-74.93480961	7.938640155	0.0158	0.0199	0.0183	0.0231	0.0274	0.0322	0.042	0.0376	0.0455	0.0576	0.0537	0.0427	0.238879736	-0.491666667	shadows
-74.93490029	7.938911537	0.0152	0.0194	0.0187	0.0224	0.0275	0.037	0.0471	0.0395	0.0494	0.0631	0.0546	0.0415	0.276252019	-0.489768076	shadows
-74.93453761	7.937373732	0.0162	0.0191	0.0181	0.0185	0.0237	0.0327	0.0404	0.039	0.0442	0.0727	0.0457	0.0314	0.356521739	-0.432601881	shadows
-74.95368408	7.917385565	0.0271	0.0286	0.0356	0.0337	0.0509	0.0984	0.1209	0.1219	0.1233	0.1202	0.078	0.0423	0.566838046	-0.373239437	shadows
-74.98635356	7.673246035	0.0397	0.0352	0.0431	0.0302	0.0645	0.1652	0.2152	0.1697	0.2309	0.2701	0.1072	0.0557	0.697848924	-0.426480373	shadows
-74.95013487	8.007298094	0.0223	0.0381	0.0501	0.0425	0.0665	0.1115	0.1347	0.1475	0.1424	0.1519	0.1006	0.052	0.552631579	-0.335102853	shadows
-74.94759665	7.986312099	0.0146	0.0159	0.0143	0.0105	0.0155	0.0326	0.0441	0.0209	0.0399	0.0549	0.0292	0.0188	0.331210191	-0.342528736	shadows
-74.96302936	7.912411424	0.0261	0.0305	0.0327	0.027	0.0403	0.0733	0.0899	0.0846	0.0943	0.1056	0.062	0.0386	0.516129032	-0.309398099	shadows
-74.95177896	7.916118967	0.0281	0.0286	0.0323	0.038	0.0486	0.0608	0.0739	0.0681	0.0771	0.0884	0.0734	0.0494	0.283694628	-0.388836329	shadows
-74.95205098	7.917566293	0.026	0.0288	0.0393	0.0337	0.0569	0.1122	0.1371	0.1237	0.143	0.1646	0.0917	0.0458	0.571791614	-0.4	shadows
-74.93939304	7.612093036	0.0341	0.0343	0.0421	0.0299	0.0576	0.1402	0.1771	0.1746	0.1863	0.2459	0.0989	0.052	0.707579462	-0.402836879	shadows
-74.95313985	7.916209578	0.0236	0.0245	0.0229	0.0256	0.0338	0.0559	0.0678	0.0559	0.0714	0.0848	0.0596	0.0362	0.371779141	-0.444848485	shadows
-74.99959174	7.909880295	0.04	0.0387	0.0404	0.0315	0.046	0.0738	0.0923	0.0956	0.0949	0.1366	0.0683	0.0426	0.504327301	-0.256669733	shadows
-74.90658116	7.57771349	0.0289	0.0331	0.0417	0.0285	0.0561	0.1129	0.1347	0.1252	0.1401	0.2318	0.0822	0.0448	0.62914769	-0.326876513	shadows
-74.98979296	7.929599554	0.0438	0.0419	0.0526	0.0461	0.0908	0.1529	0.1827	0.1317	0.2032	0.2475	0.1638	0.0979	0.48143982	-0.513863216	shadows
-74.92928051	7.906346528	0.029	0.0292	0.0391	0.0285	0.0511	0.0919	0.1118	0.1184	0.1258	0.1473	0.077	0.0364	0.611980939	-0.326442722	shadows
-74.9034268	7.894943915	0.0221	0.0289	0.0354	0.0356	0.0515	0.079	0.0974	0.0802	0.1027	0.1455	0.0715	0.0437	0.385146805	-0.337698784	shadows
-74.99795871	7.906171597	0.0429	0.0359	0.0462	0.0352	0.0588	0.1153	0.1461	0.1376	0.1558	0.1549	0.102	0.0575	0.592592593	-0.376518219	shadows
-74.98670837	7.922996189	0.0213	0.0246	0.0269	0.0172	0.0353	0.1011	0.1351	0.1361	0.1404	0.1449	0.0606	0.0283	0.775603392	-0.385142857	shadows
-74.93499111	7.938368817	0.0172	0.019	0.0185	0.0203	0.0262	0.0336	0.0416	0.0383	0.0449	0.0556	0.0548	0.0417	0.307167235	-0.495225102	shadows
-74.91863235	7.608380895	0.0335	0.036	0.0415	0.0346	0.0546	0.0931	0.114	0.1079	0.12	0.1691	0.0993	0.0603	0.514385965	-0.410511364	shadows
-74.93933853	7.990562381	0.0199	0.0196	0.0284	0.0154	0.0485	0.1654	0.2282	0.1902	0.254	0.2713	0.1002	0.0476	0.850194553	-0.558320373	shadows
-74.97745192	7.963519982	0.0166	0.0172	0.0178	0.0109	0.0224	0.0633	0.0809	0.0733	0.0858	0.0846	0.0418	0.0227	0.741092637	-0.402684564	shadows
-74.95476487	7.989750257	0.0212	0.0257	0.033	0.0239	0.0487	0.0959	0.1151	0.11	0.1211	0.1254	0.073	0.0377	0.643017177	-0.377358491	shadows
-74.97412142	7.525257428	0.0409	0.0398	0.0457	0.0319	0.0656	0.1468	0.1821	0.1773	0.2025	0.3112	0.1054	0.0558	0.695028681	-0.395102581	shadows
-74.95217085	7.660670078	0.0407	0.0369	0.0425	0.0379	0.0544	0.0989	0.1176	0.1108	0.124	0.1738	0.0838	0.0532	0.490248823	-0.326999208	shadows
-74.93661662	7.988119673	0.0099	0.0121	0.0132	0.0074	0.015	0.0423	0.0611	0.058	0.063	0.057	0.0332	0.0188	0.773700306	-0.431034483	shadows
-74.9355356	7.937735711	0.0174	0.0201	0.0236	0.0153	0.0298	0.0599	0.0765	0.0671	0.0782	0.0797	0.0519	0.0299	0.628640777	-0.374834437	shadows
-74.95205119	7.915757175	0.0267	0.0244	0.0295	0.0235	0.0401	0.0668	0.0822	0.0843	0.0794	0.0892	0.0651	0.0407	0.564007421	-0.376321353	shadows
-74.97249001	7.522724517	0.036	0.0435	0.0533	0.0362	0.066	0.1382	0.1627	0.156	0.173	0.2665	0.1012	0.0548	0.623309053	-0.310032362	shadows
-74.93435598	7.938459173	0.0131	0.013	0.01	0.0108	0.0176	0.0329	0.0455	0.0364	0.0475	0.0686	0.0406	0.0273	0.542372881	-0.604743083	shadows
-74.95467412	7.989750247	0.0211	0.024	0.0329	0.0245	0.0482	0.0998	0.1171	0.1027	0.1221	0.1178	0.0735	0.037	0.614779874	-0.381578947	shadows
-74.90333608	7.894943894	0.0219	0.027	0.0366	0.0294	0.0555	0.0863	0.1062	0.0943	0.1128	0.1407	0.0733	0.0458	0.524656427	-0.333939945	shadows
-74.93444665	7.93882101	0.0128	0.0129	0.0115	0.01	0.0188	0.0366	0.0505	0.047	0.0549	0.069	0.0411	0.0283	0.649122807	-0.562737643	shadows
-74.91400711	7.61624977	0.0311	0.035	0.0417	0.0288	0.0569	0.1193	0.1439	0.1401	0.1504	0.2152	0.0886	0.0512	0.658969805	-0.359938603	shadows
-74.97853858	8.005400983	0.0269	0.0371	0.0409	0.0326	0.0406	0.0647	0.0754	0.0972	0.0756	0.0921	0.0529	0.0304	0.497688752	-0.12793177	shadows
-74.97237456	7.905175673	0.0259	0.023	0.0253	0.0148	0.032	0.0763	0.0977	0.0878	0.0992	0.1362	0.0503	0.0297	0.711500975	-0.330687831	shadows
-74.97258064	7.522905438	0.0353	0.0376	0.045	0.0308	0.0591	0.1338	0.1652	0.154	0.1732	0.2738	0.0929	0.0501	0.666666667	-0.347353154	shadows
-74.95262434	7.659494187	0.0284	0.0324	0.036	0.0309	0.0463	0.0827	0.0977	0.0889	0.1058	0.1837	0.0748	0.0471	0.484140234	-0.350180505	shadows
-74.93453758	7.937554644	0.0159	0.0178	0.0154	0.0168	0.024	0.0321	0.0397	0.0383	0.0438	0.063	0.0459	0.0317	0.390199637	-0.497553018	shadows
-74.918723	7.608471369	0.0351	0.0422	0.0475	0.0405	0.0641	0.1055	0.1261	0.1224	0.1274	0.1824	0.1149	0.0679	0.502762431	-0.415024631	shadows
-74.98625471	7.923719822	0.0174	0.0193	0.0246	0.0132	0.0276	0.0782	0.1052	0.1028	0.1021	0.1066	0.0487	0.0262	0.772413793	-0.328785812	shadows
-74.95040703	8.007931315	0.0224	0.034	0.0445	0.0399	0.064	0.128	0.1553	0.1466	0.1658	0.1655	0.0972	0.0477	0.572117962	-0.371912491	shadows
-74.98652683	7.925619404	0.0265	0.0234	0.0296	0.0178	0.0476	0.1059	0.1355	0.1153	0.1485	0.1788	0.0832	0.0452	0.732531931	-0.475177305	shadows
-74.97237452	7.905808865	0.0244	0.0227	0.025	0.0166	0.0374	0.0979	0.1368	0.0928	0.1424	0.1666	0.0626	0.0348	0.696526508	-0.429223744	shadows
-74.96312007	7.912501888	0.0248	0.0266	0.0316	0.022	0.0352	0.0712	0.0868	0.079	0.0934	0.101	0.0581	0.0353	0.564356436	-0.295429208	shadows
-74.98634544	7.923629369	0.0179	0.0192	0.0218	0.0137	0.0272	0.0746	0.1021	0.0971	0.1028	0.1088	0.0483	0.0264	0.752707581	-0.378031384	shadows
-74.95168835	7.915123942	0.0269	0.0276	0.0303	0.0269	0.0412	0.0633	0.0748	0.0712	0.0773	0.1595	0.067	0.0413	0.45158002	-0.377183967	shadows
-74.934991	7.939092463	0.0146	0.0168	0.0195	0.0218	0.0259	0.0406	0.0516	0.0423	0.0579	0.0677	0.0515	0.0365	0.319812793	-0.450704225	shadows
-74.95186971	7.915938066	0.027	0.0299	0.0312	0.0359	0.0458	0.0624	0.075	0.0731	0.0763	0.0845	0.0711	0.0464	0.341284404	-0.390029326	shadows
-74.97727044	7.963700883	0.0167	0.018	0.0185	0.0113	0.021	0.0584	0.0815	0.0757	0.0838	0.0889	0.0415	0.0234	0.740229885	-0.383333333	shadows
-74.97430272	7.525076524	0.0428	0.0424	0.0472	0.0361	0.0719	0.1591	0.1946	0.1635	0.2096	0.3215	0.1166	0.0644	0.638276553	-0.423687424	shadows
-74.93480949	7.939363801	0.0125	0.0118	0.0124	0.0085	0.0187	0.0478	0.0689	0.0623	0.0746	0.0801	0.04	0.0237	0.759887006	-0.526717557	shadows
-74.9716488	7.904723345	0.025	0.0273	0.0254	0.0235	0.0308	0.0544	0.0672	0.0588	0.0703	0.1243	0.0522	0.0349	0.428918591	-0.345360825	shadows
-74.99931956	7.909156647	0.0456	0.0381	0.0455	0.0336	0.0529	0.1057	0.1319	0.1215	0.1354	0.1361	0.0911	0.0533	0.566731141	-0.333821376	shadows
-74.95341202	7.916300065	0.025	0.0225	0.0244	0.0203	0.0331	0.0611	0.0767	0.0688	0.081	0.0997	0.0546	0.0327	0.544332211	-0.382278481	shadows
-74.97239938	7.522453139	0.0373	0.0443	0.0565	0.0386	0.0726	0.1519	0.1817	0.1735	0.1899	0.2594	0.115	0.0615	0.636020745	-0.341107872	shadows
-74.91736311	7.608380655	0.0301	0.037	0.0386	0.0321	0.0454	0.088	0.1069	0.1012	0.1134	0.1298	0.0814	0.0485	0.518379595	-0.356666667	shadows
-74.91401939	7.999874804	0.0296	0.027	0.0397	0.0233	0.0557	0.1507	0.1875	0.1825	0.2028	0.2353	0.0927	0.0383	0.773566569	-0.400302115	shadows
-74.9864443	7.671075071	0.0385	0.0356	0.0411	0.0299	0.0599	0.1528	0.1981	0.1664	0.2122	0.248	0.0987	0.0466	0.695364238	-0.412017167	shadows
-74.97439335	7.525257444	0.0437	0.0445	0.0527	0.0394	0.0726	0.1476	0.1788	0.1692	0.1899	0.316	0.1182	0.0656	0.622243528	-0.383265067	shadows
-74.93499124	7.937554715	0.0182	0.0233	0.0196	0.0208	0.0265	0.0342	0.0448	0.0409	0.0473	0.0641	0.056	0.0398	0.325769854	-0.481481481	shadows
-74.97131164	7.522995814	0.0341	0.039	0.0419	0.0317	0.0538	0.1103	0.1325	0.1284	0.1412	0.2243	0.0862	0.0493	0.603997502	-0.345823575	shadows
-74.93517259	7.938278389	0.0175	0.0185	0.0168	0.0199	0.0252	0.0375	0.0466	0.0385	0.0516	0.0578	0.0519	0.0373	0.318493151	-0.510917031	shadows
-74.97249003	7.522362687	0.0376	0.0458	0.0619	0.0416	0.0773	0.1684	0.1992	0.1989	0.2127	0.268	0.1245	0.0638	0.654054054	-0.33583691	shadows
-74.99768654	7.905538404	0.0433	0.0384	0.0431	0.0313	0.0552	0.1104	0.1379	0.1332	0.1461	0.1498	0.0952	0.0553	0.619452888	-0.376717281	shadows
-74.99841231	7.910423028	0.0476	0.0366	0.0419	0.0308	0.0556	0.1124	0.1383	0.1303	0.1446	0.1458	0.092	0.0548	0.617628802	-0.374159821	shadows
-74.9352633	7.938368859	0.0172	0.0186	0.0189	0.0199	0.0247	0.0425	0.0558	0.0423	0.0597	0.0599	0.0496	0.0339	0.360128617	-0.448175182	shadows
-74.95276854	7.989659578	0.0251	0.0185	0.0229	0.0157	0.0332	0.0738	0.0938	0.0965	0.1026	0.1182	0.0582	0.033	0.720142602	-0.435265105	shadows
-74.93444664	7.938911466	0.0128	0.0125	0.0105	0.0077	0.0182	0.0392	0.0529	0.0461	0.0586	0.0717	0.0403	0.0263	0.713754647	-0.586614173	shadows
-74.9859909	7.67216054	0.0352	0.0323	0.0389	0.0263	0.0486	0.1204	0.1576	0.1565	0.1641	0.186	0.0805	0.0436	0.712253829	-0.34840871	shadows
-74.93526325	7.938730682	0.0176	0.0201	0.0207	0.0187	0.0278	0.0432	0.0523	0.0473	0.0587	0.059	0.0553	0.0388	0.433333333	-0.455263158	shadows
-74.95168823	7.916209413	0.0292	0.026	0.0301	0.0322	0.0454	0.0574	0.0693	0.0655	0.0713	0.0921	0.0714	0.0492	0.340839304	-0.406896552	shadows
-74.95180835	7.659041812	0.03	0.0322	0.0379	0.0306	0.047	0.0936	0.1167	0.1092	0.1221	0.1995	0.0722	0.0437	0.56223176	-0.311534968	shadows
-74.98661756	7.925619407	0.0266	0.0224	0.0301	0.0191	0.0495	0.1063	0.1388	0.11	0.1539	0.1812	0.0875	0.0479	0.704105345	-0.488095238	shadows
-74.93526345	7.937464301	0.0189	0.022	0.0202	0.0219	0.0307	0.0443	0.0538	0.045	0.0567	0.0762	0.0559	0.0361	0.34529148	-0.46911958	shadows
-74.90270071	7.896300584	0.0173	0.0355	0.0387	0.0405	0.0368	0.0596	0.0728	0.0626	0.0782	0.1063	0.0527	0.0321	0.214354995	-0.153172867	shadows
-74.98652683	7.92570986	0.0271	0.0231	0.0312	0.0181	0.0514	0.116	0.151	0.1175	0.1678	0.1846	0.0926	0.0516	0.733038348	-0.495961228	shadows
-74.95217092	7.660036879	0.0302	0.0367	0.0399	0.0351	0.0532	0.0901	0.1111	0.0974	0.1154	0.1764	0.079	0.0488	0.470188679	-0.328847771	shadows
-74.98643595	7.930413561	0.036	0.0386	0.051	0.0434	0.0702	0.1169	0.1372	0.1353	0.143	0.1966	0.1097	0.0625	0.514269726	-0.365276914	shadows
-74.93480969	7.938097421	0.0165	0.0235	0.0193	0.0228	0.0259	0.0308	0.0399	0.0379	0.0437	0.055	0.0572	0.0416	0.248764415	-0.495424837	shadows
-74.99913811	7.91241306	0.0415	0.0319	0.0372	0.0254	0.0491	0.113	0.1491	0.1399	0.1571	0.1757	0.0805	0.0432	0.692679976	-0.367884452	shadows
-74.93490034	7.93864017	0.0165	0.0215	0.0187	0.0238	0.0277	0.0343	0.0443	0.0405	0.0468	0.0571	0.0552	0.0426	0.259720062	-0.49391069	shadows
-74.93906667	7.988029586	0.0157	0.0195	0.0252	0.0109	0.0295	0.0843	0.1089	0.1349	0.1152	0.1413	0.0502	0.0233	0.85048011	-0.331564987	shadows
-74.91591129	7.61480283	0.0272	0.0321	0.0359	0.0257	0.0481	0.1075	0.1326	0.1211	0.1401	0.1666	0.0759	0.0419	0.64986376	-0.357781753	shadows
-74.92928058	7.905984704	0.0274	0.0242	0.0277	0.0255	0.0315	0.0374	0.0482	0.0427	0.0473	0.1161	0.0366	0.0204	0.252199413	-0.138413686	shadows
-74.9869805	7.92471486	0.0222	0.0204	0.0248	0.0141	0.0363	0.1004	0.1355	0.1135	0.1391	0.154	0.0634	0.0333	0.778996865	-0.437641723	shadows
-74.93779597	7.990109874	0.0426	0.0134	0.0181	0.0116	0.0327	0.0785	0.1132	0.0718	0.1369	0.1779	0.0718	0.0517	0.721822542	-0.597330367	shadows
-74.96148688	7.913949035	0.0701	0.0303	0.0363	0.0359	0.0538	0.0898	0.1166	0.0944	0.1282	0.2021	0.088	0.0614	0.448963929	-0.415929204	shadows
-74.99886594	7.907528439	0.0437	0.039	0.0455	0.0366	0.0547	0.1073	0.1359	0.1231	0.1449	0.149	0.0944	0.0529	0.541640576	-0.349535382	shadows
-74.94923	7.986312303	0.0201	0.0238	0.0295	0.0205	0.0555	0.1374	0.17	0.1278	0.1845	0.164	0.0879	0.0428	0.723533378	-0.497444634	shadows
-74.98626296	7.670894151	0.0384	0.0352	0.0412	0.0283	0.0542	0.1374	0.1796	0.1611	0.1925	0.2077	0.0872	0.044	0.701161563	-0.358255452	shadows
-74.9483226	7.986131279	0.0159	0.0172	0.0159	0.0117	0.0199	0.0429	0.0549	0.0491	0.0593	0.0736	0.0316	0.0169	0.615131579	-0.330526316	shadows
-74.97230872	7.522814963	0.0353	0.0401	0.0489	0.0368	0.0607	0.1219	0.1446	0.1392	0.1535	0.2495	0.0969	0.0557	0.581818182	-0.329218107	shadows
-74.93517267	7.937735655	0.0181	0.0209	0.0203	0.0216	0.0282	0.0405	0.0507	0.0428	0.0525	0.0635	0.056	0.0386	0.329192547	-0.467889908	shadows
-74.93948364	7.612545335	0.0339	0.035	0.0462	0.0288	0.059	0.1411	0.1792	0.1779	0.191	0.2597	0.1052	0.0512	0.721335269	-0.389696169	shadows
-74.98997427	7.935479188	0.0458	0.0254	0.0325	0.0188	0.0402	0.1002	0.13	0.106	0.1413	0.1754	0.0819	0.0573	0.698717949	-0.431818182	shadows
-74.95186966	7.916390345	0.0281	0.0316	0.0337	0.0409	0.0483	0.058	0.068	0.0631	0.0707	0.0878	0.0732	0.0495	0.213461538	-0.36950421	shadows
-74.93480973	7.937826054	0.0169	0.0208	0.0176	0.0195	0.026	0.0311	0.0419	0.0414	0.0446	0.0575	0.0563	0.0406	0.359605911	-0.52368065	shadows
-74.97853856	8.005762805	0.0231	0.0247	0.0271	0.0198	0.0302	0.0509	0.0608	0.0593	0.0614	0.068	0.0404	0.0244	0.499367889	-0.197037037	shadows
-74.95467413	7.989659791	0.0207	0.0246	0.0331	0.0247	0.046	0.0938	0.1136	0.0934	0.1187	0.1144	0.0721	0.0364	0.581710415	-0.370722433	shadows
-74.93553565	7.937373888	0.0196	0.0214	0.0245	0.0203	0.0326	0.0632	0.0768	0.0693	0.0821	0.0908	0.0551	0.0315	0.546875	-0.384422111	shadows
-74.99786798	7.906262052	0.0424	0.0382	0.0454	0.0354	0.0581	0.113	0.1443	0.1306	0.1524	0.1516	0.1006	0.0572	0.573493976	-0.378082192	shadows
-74.90442417	7.897386452	0.0108	0.0163	0.0167	0.0099	0.022	0.0554	0.0695	0.0649	0.0739	0.0787	0.04	0.0212	0.735294118	-0.410934744	shadows
-74.97574582	7.65343549	0.0341	0.0306	0.0404	0.0285	0.0593	0.1636	0.2018	0.1719	0.2124	0.2084	0.1081	0.0509	0.715568862	-0.455892256	shadows
-74.98644431	7.670894157	0.0389	0.0355	0.0433	0.029	0.0601	0.1562	0.2051	0.1695	0.2195	0.2394	0.0975	0.0473	0.707808564	-0.384943182	shadows
-74.95235231	7.659675071	0.0288	0.0357	0.0414	0.035	0.052	0.0862	0.106	0.1041	0.1111	0.1848	0.0769	0.0475	0.496764917	-0.300084531	shadows
-74.9864443	7.670984614	0.0387	0.0364	0.0437	0.0298	0.0585	0.1486	0.1941	0.1655	0.2081	0.2437	0.0957	0.0456	0.694828469	-0.37302726	shadows
-74.90922776	7.918825554	0.0205	0.0187	0.0259	0.0132	0.0315	0.0872	0.1127	0.1279	0.116	0.1245	0.0511	0.0252	0.812898653	-0.327272727	shadows
-74.95295829	7.917114117	0.0226	0.0257	0.031	0.0255	0.042	0.067	0.0808	0.0726	0.0855	0.0891	0.0713	0.0417	0.480122324	-0.393939394	shadows
-74.94696063	7.992734362	0.0349	0.0251	0.0447	0.0248	0.0986	0.2808	0.3575	0.2614	0.3878	0.3685	0.1833	0.0865	0.826694619	-0.607894737	shadows
-74.95208031	7.659494127	0.0289	0.0306	0.0353	0.0275	0.0459	0.0905	0.1117	0.1104	0.1177	0.1858	0.0736	0.0452	0.601160261	-0.351698806	shadows
-74.96974351	7.905989594	0.0314	0.0266	0.0311	0.0238	0.0392	0.0707	0.0885	0.0774	0.09	0.1262	0.0641	0.0389	0.529644269	-0.346638655	shadows
-74.97881292	7.964695977	0.0175	0.0159	0.0182	0.0097	0.0237	0.0692	0.0935	0.0897	0.0993	0.1211	0.0457	0.0247	0.804828974	-0.430359937	shadows
-74.93499107	7.938640184	0.0171	0.0197	0.0197	0.022	0.028	0.0362	0.047	0.0407	0.0494	0.0567	0.0555	0.0416	0.298245614	-0.47606383	shadows
-74.98734322	7.93104678	0.0461	0.0271	0.0358	0.0305	0.0683	0.1466	0.1882	0.1302	0.2044	0.2253	0.11	0.0665	0.620410703	-0.508916324	shadows
-74.93634443	7.987938721	0.0109	0.0129	0.0153	0.0075	0.0168	0.0493	0.0664	0.0715	0.0673	0.0595	0.0326	0.0178	0.810126582	-0.361169102	shadows
-74.97258065	7.522724523	0.036	0.0401	0.0539	0.0368	0.066	0.1447	0.1747	0.1604	0.1842	0.2748	0.1024	0.0544	0.626774848	-0.310300704	shadows
-74.9521419	7.915847641	0.0266	0.0242	0.0297	0.0258	0.0392	0.0589	0.0706	0.0743	0.0739	0.0857	0.0644	0.0413	0.484515485	-0.368756642	shadows
-74.93571688	7.938911664	0.0169	0.0226	0.0214	0.0241	0.0316	0.0566	0.0718	0.057	0.075	0.0708	0.0546	0.0348	0.40567201	-0.436842105	shadows
-74.99197035	7.935117408	0.0217	0.0214	0.0299	0.0166	0.0375	0.0959	0.1248	0.1105	0.1255	0.1524	0.0578	0.0295	0.738788356	-0.318129989	shadows
-74.94659856	7.985769238	0.0135	0.0154	0.0198	0.014	0.0256	0.0522	0.0641	0.0609	0.0666	0.0588	0.0463	0.0264	0.626168224	-0.400907716	shadows
-74.99922883	7.912051237	0.0387	0.0312	0.0389	0.024	0.0487	0.1068	0.1329	0.1232	0.142	0.1487	0.0784	0.0428	0.673913043	-0.336743393	shadows
-74.99922884	7.909880295	0.0432	0.0441	0.0442	0.0374	0.0473	0.0664	0.0833	0.0634	0.0828	0.1251	0.0685	0.0442	0.257936508	-0.215616681	shadows
-74.98843202	7.929689974	0.0356	0.0368	0.0486	0.0468	0.0727	0.1175	0.134	0.1423	0.1429	0.1759	0.1079	0.0613	0.505023797	-0.378913738	shadows
-74.93544492	7.937373874	0.0195	0.0211	0.0233	0.0244	0.0335	0.0588	0.0705	0.0608	0.0744	0.0871	0.0549	0.0335	0.427230047	-0.404092072	shadows
-74.98698056	7.922996198	0.0226	0.0232	0.0329	0.0151	0.0371	0.1072	0.1396	0.1579	0.1505	0.1931	0.065	0.03	0.825433526	-0.327885598	shadows
-74.98961151	7.929237726	0.0437	0.0423	0.0552	0.0507	0.0833	0.1366	0.1634	0.1433	0.174	0.2144	0.1422	0.0769	0.477319588	-0.440729483	shadows
-74.95049775	8.008112237	0.022	0.0245	0.0391	0.0268	0.0596	0.1426	0.1726	0.1537	0.1809	0.171	0.0941	0.0418	0.703047091	-0.412912913	shadows
-74.96293862	7.912501872	0.0255	0.0269	0.0297	0.0218	0.0367	0.0713	0.0886	0.0844	0.0922	0.1033	0.0593	0.0376	0.589453861	-0.33258427	shadows
-74.99968246	7.910965766	0.0352	0.0319	0.0369	0.0253	0.0451	0.0943	0.1219	0.1159	0.1302	0.1374	0.0767	0.0435	0.641643059	-0.350352113	shadows
-74.93499103	7.938911551	0.0158	0.0192	0.0189	0.0208	0.0284	0.0412	0.0517	0.0418	0.0541	0.0624	0.0545	0.0418	0.335463259	-0.485013624	shadows
-74.9362537	7.987848251	0.0113	0.0159	0.0173	0.0103	0.0167	0.0503	0.0696	0.0793	0.0701	0.0609	0.0339	0.0191	0.770089286	-0.32421875	shadows
-74.93499125	7.937464259	0.0183	0.0212	0.0188	0.0178	0.0263	0.0348	0.0457	0.0411	0.0481	0.0683	0.0552	0.0389	0.395585739	-0.491891892	shadows
-74.98743395	7.931046783	0.0436	0.0305	0.042	0.0326	0.0609	0.1343	0.1716	0.1216	0.185	0.2167	0.1009	0.0599	0.577172503	-0.412176347	shadows
-74.93562643	7.937102535	0.0219	0.0219	0.0263	0.0214	0.0365	0.0692	0.0813	0.0705	0.0875	0.1026	0.0562	0.0332	0.534276387	-0.362424242	shadows
-74.91890442	7.60792866	0.0314	0.033	0.0383	0.0311	0.0499	0.0939	0.1136	0.111	0.1225	0.1585	0.0858	0.0514	0.562280084	-0.382755842	shadows
-74.95280562	7.660036949	0.0276	0.0326	0.0372	0.0306	0.0459	0.0901	0.1107	0.0996	0.1191	0.1674	0.072	0.0443	0.529953917	-0.318681319	shadows
-74.95304912	7.916209568	0.0229	0.0243	0.0254	0.027	0.0341	0.0545	0.0656	0.0543	0.069	0.0793	0.0598	0.0373	0.335793358	-0.403755869	shadows
-74.93444657	7.939363744	0.014	0.0112	0.012	0.0078	0.0184	0.0522	0.0755	0.0757	0.081	0.0871	0.0386	0.0226	0.813173653	-0.5256917	shadows
-74.93499101	7.939002007	0.0152	0.0201	0.0197	0.0205	0.0271	0.0409	0.0516	0.0416	0.056	0.0651	0.053	0.0391	0.339774557	-0.458046768	shadows
-74.98661741	7.930323111	0.0337	0.0353	0.0445	0.0378	0.0601	0.1026	0.1236	0.1196	0.1288	0.1671	0.0927	0.0527	0.519695044	-0.351311953	shadows
-74.9515975	7.916209402	0.03	0.0235	0.0286	0.029	0.0424	0.0556	0.0673	0.0621	0.0681	0.0948	0.0696	0.049	0.363336992	-0.417515275	shadows
-74.95549083	7.989478969	0.0218	0.0231	0.0276	0.0206	0.0387	0.0844	0.1074	0.0884	0.1121	0.1612	0.0638	0.0314	0.622018349	-0.396061269	shadows
-74.97131163	7.523086272	0.0341	0.0361	0.0419	0.0291	0.0538	0.1102	0.1334	0.1333	0.1421	0.2265	0.0852	0.0481	0.641625616	-0.340676633	shadows
-74.95268613	7.916933174	0.0233	0.0257	0.0279	0.0249	0.0395	0.0647	0.0779	0.0718	0.0829	0.0868	0.0687	0.0413	0.485005171	-0.422360248	shadows
-74.9349911	7.938459272	0.0172	0.0193	0.0183	0.0207	0.0269	0.0344	0.0433	0.0378	0.0463	0.056	0.0548	0.0417	0.292307692	-0.499316005	shadows
-74.91411011	7.999965278	0.0324	0.0282	0.04	0.0233	0.0555	0.1611	0.2077	0.2027	0.2243	0.2434	0.0986	0.0469	0.79380531	-0.422799423	shadows
-74.95235224	7.66030827	0.0295	0.0327	0.0371	0.0298	0.0466	0.0895	0.1103	0.1104	0.118	0.1547	0.0733	0.0442	0.57489301	-0.327898551	shadows
-74.95350273	7.916390531	0.0249	0.0224	0.0264	0.0193	0.0353	0.067	0.0831	0.0737	0.0866	0.1031	0.0583	0.0336	0.584946237	-0.376623377	shadows
-74.95232328	7.916480853	0.025	0.0259	0.0271	0.0271	0.0389	0.0573	0.0737	0.063	0.0739	0.0819	0.0643	0.0413	0.398446171	-0.407002188	shadows
-74.99097231	7.935298299	0.0224	0.0201	0.0269	0.0147	0.0354	0.0898	0.1157	0.1056	0.1216	0.1251	0.0562	0.0313	0.755610973	-0.352587244	shadows
-74.97654473	7.960444437	0.022	0.0219	0.0277	0.014	0.0426	0.1138	0.1413	0.1337	0.1488	0.1542	0.0662	0.0296	0.81042654	-0.41001065	shadows
-74.97067713	7.523176688	0.036	0.0444	0.0479	0.0367	0.0616	0.1178	0.1413	0.1344	0.1479	0.2459	0.0983	0.0568	0.571011105	-0.344733242	shadows
-74.9475968	7.985136177	0.0158	0.0162	0.0186	0.0147	0.0259	0.0512	0.0648	0.0555	0.0656	0.0706	0.041	0.023	0.581196581	-0.375838926	shadows
-74.98797836	7.930051785	0.0311	0.0325	0.0411	0.0375	0.0578	0.0974	0.1162	0.1148	0.1266	0.1388	0.09	0.0513	0.507550886	-0.372997712	shadows
-74.93435599	7.938368717	0.0135	0.0135	0.01	0.0102	0.0177	0.0324	0.042	0.0389	0.0463	0.0672	0.0409	0.0277	0.584521385	-0.607072692	shadows
-74.95196042	7.916118988	0.0268	0.0297	0.0313	0.0374	0.0471	0.0596	0.0718	0.0647	0.0703	0.0832	0.0715	0.0494	0.267384917	-0.391050584	shadows
-74.95262435	7.65940373	0.0285	0.0318	0.035	0.03	0.0464	0.0859	0.1003	0.0979	0.1082	0.1837	0.0748	0.0468	0.530883503	-0.362477231	shadows
-74.99922884	7.910603942	0.0415	0.0351	0.0403	0.0305	0.0494	0.0993	0.1236	0.1138	0.1292	0.13	0.0876	0.0518	0.577269577	-0.369820172	shadows
-74.9706508	7.905266011	0.0237	0.023	0.025	0.0159	0.0299	0.068	0.0953	0.082	0.0964	0.1075	0.0503	0.0305	0.675178754	-0.335989376	shadows
-74.93443871	7.988752523	0.0162	0.0179	0.0231	0.0113	0.0284	0.0804	0.1068	0.139	0.113	0.13	0.0519	0.0221	0.849634065	-0.384	shadows
-74.99922884	7.909247103	0.0446	0.0387	0.0427	0.0324	0.0512	0.1001	0.1241	0.1144	0.1288	0.1328	0.0889	0.0514	0.558583106	-0.35106383	shadows
-74.9642088	7.912321071	0.0233	0.0269	0.0297	0.0223	0.0369	0.0706	0.0861	0.0855	0.0936	0.1054	0.0587	0.0327	0.586270872	-0.328054299	shadows
-74.98924859	7.929418629	0.0374	0.037	0.0447	0.0435	0.0649	0.1055	0.1234	0.1103	0.1311	0.1589	0.0992	0.0566	0.434330299	-0.378735233	shadows
-74.91890433	7.608380946	0.0354	0.0408	0.0472	0.0415	0.0657	0.1051	0.1194	0.1125	0.1232	0.185	0.1135	0.0685	0.461038961	-0.412570006	shadows
-74.95031627	8.00802176	0.0218	0.0255	0.039	0.0246	0.0558	0.1201	0.1537	0.1757	0.17	0.1658	0.0865	0.0407	0.754368447	-0.378486056	shadows
-74.99804943	7.906081141	0.043	0.038	0.0467	0.0353	0.0586	0.1182	0.1465	0.1357	0.1545	0.156	0.1027	0.0587	0.587134503	-0.374832664	shadows
-74.90803134	7.579070657	0.0283	0.0344	0.047	0.0307	0.0659	0.1409	0.1623	0.1637	0.1709	0.2276	0.0951	0.0491	0.684156379	-0.338494018	shadows
-74.94706184	7.911052866	0.0205	0.0212	0.0301	0.0149	0.0406	0.1102	0.1418	0.1398	0.1546	0.1549	0.0687	0.031	0.807369101	-0.390688259	shadows
-74.93517273	7.937373832	0.0191	0.0221	0.0207	0.0235	0.0283	0.0392	0.0502	0.0445	0.0524	0.0761	0.0561	0.039	0.308823529	-0.4609375	shadows
-74.97065085	7.90463282	0.0243	0.0227	0.0265	0.0166	0.0336	0.0711	0.0938	0.0894	0.098	0.1121	0.0523	0.0308	0.686792453	-0.327411168	shadows
-74.95217083	7.660850992	0.0455	0.0385	0.0435	0.0411	0.053	0.091	0.1103	0.1054	0.1186	0.1771	0.0825	0.0516	0.43890785	-0.30952381	shadows
-74.95253366	7.659584634	0.0285	0.033	0.035	0.03	0.0465	0.0814	0.0949	0.0908	0.1042	0.1839	0.0741	0.0473	0.503311258	-0.358386801	shadows
-74.99088158	7.935298297	0.0233	0.0201	0.0263	0.0146	0.0351	0.0898	0.1142	0.1034	0.1195	0.1272	0.0573	0.032	0.752542373	-0.370813397	shadows
-74.97239938	7.522543596	0.0368	0.044	0.054	0.0375	0.0701	0.1443	0.1719	0.1598	0.1795	0.259	0.1096	0.0593	0.619868221	-0.339853301	shadows
-74.98698032	7.93059449	0.0311	0.0333	0.0416	0.0387	0.0692	0.1183	0.138	0.1	0.1435	0.1462	0.1021	0.0577	0.441961067	-0.421016006	shadows
-74.952414	7.91657132	0.0245	0.0222	0.0263	0.0273	0.038	0.0592	0.073	0.0651	0.076	0.0829	0.0637	0.0395	0.409090909	-0.415555556	shadows
-74.98707123	7.924714862	0.0226	0.0193	0.0266	0.0145	0.0382	0.1056	0.1421	0.1281	0.1501	0.1642	0.0668	0.0333	0.796633941	-0.430406852	shadows
-74.97183015	7.906261108	0.0264	0.0202	0.0218	0.015	0.0301	0.0718	0.097	0.0866	0.1006	0.1208	0.053	0.0317	0.704724409	-0.417112299	shadows
-74.95189905	7.658770451	0.0309	0.0354	0.0389	0.0342	0.0508	0.0943	0.1141	0.1068	0.121	0.2052	0.078	0.0466	0.514893617	-0.334473909	shadows
-74.93535399	7.93864024	0.0174	0.0214	0.0187	0.0183	0.0266	0.048	0.06	0.0502	0.0652	0.0607	0.0514	0.0339	0.465693431	-0.466476462	shadows
-74.97790565	7.96279636	0.0214	0.0247	0.0225	0.023	0.0281	0.0453	0.056	0.0419	0.06	0.0808	0.0511	0.0356	0.291217257	-0.388586957	shadows
-74.91582063	7.614802813	0.0274	0.0328	0.036	0.0258	0.0476	0.1075	0.1327	0.1252	0.1404	0.1628	0.0751	0.0416	0.658278146	-0.351935194	shadows
-74.97103969	7.523267169	0.0351	0.0399	0.0478	0.0349	0.0567	0.1134	0.1381	0.1302	0.1449	0.2333	0.0909	0.0509	0.577225924	-0.31074261	shadows
-74.95049778	8.007931326	0.0226	0.0353	0.044	0.0393	0.0643	0.1283	0.1488	0.1394	0.1578	0.167	0.0986	0.0502	0.560156687	-0.382889201	shadows
-74.91826973	7.60829037	0.0304	0.0356	0.0393	0.0333	0.0504	0.0918	0.1094	0.0992	0.1197	0.1383	0.0903	0.0549	0.497358491	-0.393518519	shadows
-74.95295828	7.917204572	0.0231	0.0299	0.0294	0.0293	0.0436	0.0683	0.082	0.0734	0.0871	0.0927	0.0735	0.0433	0.429406037	-0.428571429	shadows
-74.93579903	7.993999156	0.0384	0.0308	0.043	0.0381	0.0617	0.1295	0.1612	0.1468	0.1663	0.2339	0.0982	0.0515	0.587885343	-0.390934844	shadows
-74.98952077	7.929418636	0.0399	0.0456	0.0582	0.0493	0.0716	0.1181	0.1418	0.1571	0.1466	0.1699	0.1124	0.0619	0.522286822	-0.317702227	shadows
-74.98635363	7.670984611	0.0384	0.036	0.0415	0.0285	0.0564	0.1428	0.188	0.1586	0.2019	0.2275	0.0919	0.0448	0.69535008	-0.377811094	shadows
-74.99750509	7.905267035	0.0465	0.0422	0.0465	0.0396	0.0612	0.1159	0.1434	0.1325	0.1485	0.176	0.1058	0.0585	0.53980244	-0.389363099	shadows
-74.98688977	7.924714857	0.0218	0.02	0.0225	0.0139	0.0349	0.0973	0.1292	0.115	0.1362	0.1438	0.0615	0.0317	0.784328937	-0.464285714	shadows
-74.95476489	7.989569345	0.0206	0.0244	0.0271	0.0213	0.0426	0.0872	0.1096	0.0868	0.1114	0.118	0.0679	0.0335	0.605920444	-0.429473684	shadows
-74.99895667	7.907618896	0.0443	0.0346	0.042	0.0278	0.0515	0.1121	0.1455	0.1334	0.1531	0.1507	0.0842	0.0449	0.655086849	-0.334389857	shadows
-74.93462837	7.937192835	0.0169	0.0192	0.0208	0.0204	0.0257	0.0385	0.0506	0.0507	0.0559	0.082	0.0502	0.0341	0.426160338	-0.414084507	shadows
-74.90748764	7.577985055	0.0286	0.0336	0.0377	0.028	0.0523	0.1114	0.1371	0.133	0.1476	0.2248	0.0765	0.0429	0.652173913	-0.339754816	shadows
-74.94623555	7.986131013	0.0152	0.0146	0.0174	0.0107	0.0253	0.0567	0.0716	0.0737	0.0708	0.0799	0.0424	0.0231	0.746445498	-0.418060201	shadows
-74.98389577	7.924172017	0.0284	0.0307	0.0466	0.0323	0.0657	0.1534	0.1841	0.1555	0.1889	0.2054	0.1012	0.0458	0.656017039	-0.369418133	shadows
-74.98707122	7.925076686	0.0245	0.027	0.0329	0.0243	0.0456	0.1011	0.1265	0.1055	0.1361	0.1685	0.0781	0.0415	0.625577812	-0.407207207	shadows
-74.97737787	7.653435579	0.0333	0.0285	0.0337	0.0244	0.0412	0.1027	0.1375	0.1222	0.1517	0.2084	0.0746	0.0406	0.667121419	-0.377654663	shadows
-74.94742481	7.910510177	0.0214	0.0215	0.0261	0.0143	0.0291	0.0712	0.0956	0.1034	0.0979	0.1202	0.0503	0.0246	0.757009346	-0.316753927	shadows
-74.99804943	7.90544795	0.0436	0.0375	0.0443	0.0295	0.0546	0.1123	0.1453	0.1353	0.1518	0.1533	0.0857	0.0509	0.641990291	-0.318461538	shadows
-74.99968246	7.911056222	0.0348	0.0317	0.0356	0.0227	0.0442	0.0951	0.123	0.119	0.1311	0.1334	0.0729	0.042	0.679604799	-0.343778802	shadows
-74.97908305	8.005581922	0.024	0.0226	0.027	0.0193	0.0285	0.051	0.0628	0.0612	0.0625	0.0724	0.0383	0.0237	0.520496894	-0.173047473	shadows
-74.98571891	7.67098459	0.0359	0.034	0.0435	0.029	0.061	0.138	0.1741	0.1566	0.1862	0.2114	0.0887	0.0439	0.6875	-0.341906203	shadows
-74.99913811	7.912141693	0.0388	0.0348	0.0471	0.0293	0.0511	0.1123	0.1381	0.1487	0.1492	0.1581	0.0817	0.0435	0.670786517	-0.26863354	shadows
-74.97249001	7.52263406	0.0364	0.043	0.0542	0.0374	0.0708	0.1464	0.1707	0.1666	0.1807	0.267	0.1071	0.0576	0.633333333	-0.327960322	shadows
-74.95177901	7.915757144	0.0268	0.0283	0.029	0.0312	0.0442	0.062	0.0766	0.064	0.0741	0.0909	0.0693	0.0442	0.344537815	-0.409969481	shadows
-74.97173952	7.904813807	0.0244	0.0238	0.0231	0.0173	0.0291	0.059	0.0749	0.0663	0.0786	0.1225	0.0493	0.0318	0.586124402	-0.361878453	shadows
-74.95177907	7.915214409	0.0268	0.0287	0.0298	0.0324	0.0425	0.0561	0.0645	0.0636	0.0718	0.1396	0.0654	0.0442	0.325	-0.37394958	shadows
-74.97421208	7.525076518	0.0421	0.0402	0.0469	0.0324	0.0689	0.1582	0.1976	0.1745	0.2143	0.3212	0.1114	0.0608	0.68680522	-0.407454201	shadows
-74.9476874	7.986221655	0.0147	0.0162	0.0165	0.0106	0.0192	0.0382	0.0494	0.0449	0.0534	0.0554	0.032	0.0188	0.618018018	-0.319587629	shadows
-74.98770633	7.924805337	0.0254	0.0236	0.0337	0.0172	0.0524	0.1427	0.1962	0.1908	0.2116	0.261	0.0911	0.0471	0.834615385	-0.459935897	shadows
-74.97835707	8.00567234	0.0243	0.0302	0.0338	0.0221	0.0356	0.0638	0.073	0.0968	0.0724	0.0734	0.0471	0.0274	0.628259041	-0.164400494	shadows
-74.93993721	7.610645798	0.0301	0.032	0.0365	0.0242	0.0459	0.1109	0.1415	0.14	0.1502	0.2426	0.0788	0.0451	0.705237515	-0.366869037	shadows
-74.97094904	7.523357621	0.0357	0.0408	0.048	0.0345	0.0595	0.1177	0.1414	0.1345	0.1487	0.2409	0.0941	0.0525	0.591715976	-0.324419423	shadows
-74.97844783	8.005400978	0.0271	0.0414	0.0535	0.0456	0.0486	0.0767	0.089	0.1285	0.0897	0.0922	0.0643	0.0348	0.476163125	-0.091680815	shadows
-74.9345376	7.937464188	0.016	0.0188	0.0174	0.0173	0.0236	0.0317	0.0384	0.0388	0.0433	0.0678	0.0452	0.031	0.383244207	-0.444089457	shadows
-74.9039705	7.897657716	0.0098	0.0143	0.0139	0.0088	0.0199	0.0483	0.0643	0.058	0.0689	0.0763	0.0377	0.0211	0.736526946	-0.46124031	shadows
-74.93561838	7.988662252	0.013	0.0151	0.0144	0.0079	0.0187	0.051	0.0661	0.0682	0.0722	0.0685	0.0352	0.0194	0.792378449	-0.419354839	shadows
-74.9528057	7.659313293	0.0283	0.0314	0.0364	0.0274	0.0457	0.0875	0.1063	0.1033	0.1108	0.1834	0.0714	0.0451	0.580719204	-0.324675325	shadows
-74.91754443	7.608380689	0.0304	0.0336	0.0395	0.0301	0.0461	0.0883	0.1094	0.1064	0.1169	0.137	0.0825	0.0495	0.558974359	-0.352459016	shadows
-74.97085842	7.523086242	0.035	0.0423	0.0475	0.0336	0.0582	0.1156	0.1379	0.1338	0.1461	0.2344	0.0956	0.056	0.598566308	-0.336128581	shadows
-74.93499122	7.937645171	0.018	0.0193	0.0197	0.0218	0.0267	0.0336	0.0439	0.0391	0.0465	0.0599	0.0568	0.0407	0.28407225	-0.48496732	shadows
-74.95217097	7.659584594	0.0289	0.0325	0.0359	0.0284	0.0483	0.0908	0.1081	0.103	0.1146	0.1855	0.0762	0.0486	0.567732116	-0.359500446	shadows
-74.97726809	8.006215015	0.0225	0.0224	0.0247	0.0192	0.0301	0.0513	0.0656	0.0572	0.0659	0.0634	0.0434	0.0263	0.497382199	-0.274596182	shadows
-74.99106304	7.935388757	0.022	0.0225	0.0275	0.0162	0.0359	0.0901	0.1135	0.1131	0.1193	0.1232	0.0583	0.0302	0.749419954	-0.358974359	shadows
-74.99777726	7.905900228	0.0427	0.0343	0.0413	0.0332	0.056	0.1047	0.1318	0.1222	0.1406	0.1495	0.0977	0.0559	0.572715573	-0.405755396	shadows
-74.97074157	7.904632826	0.0245	0.0247	0.028	0.0169	0.0336	0.0699	0.0906	0.0872	0.0931	0.1113	0.0519	0.0314	0.6753122	-0.299123905	shadows
-74.97935524	8.006486491	0.027	0.0242	0.0241	0.0192	0.0326	0.0557	0.0685	0.0479	0.0684	0.0708	0.043	0.0267	0.427719821	-0.281669151	shadows
-74.93580762	7.938821222	0.0171	0.0176	0.0195	0.0135	0.0277	0.0609	0.0771	0.0635	0.0824	0.0722	0.0519	0.0303	0.649350649	-0.453781513	shadows
-74.9480503	7.986764434	0.0147	0.016	0.0174	0.0122	0.021	0.0482	0.0626	0.0518	0.0654	0.0646	0.0362	0.0197	0.61875	-0.350746269	shadows
-74.96502532	7.91232114	0.0243	0.0267	0.0263	0.0172	0.0334	0.0775	0.1014	0.0927	0.1035	0.1418	0.0532	0.0286	0.686988171	-0.33836478	shadows
-74.98562824	7.671075044	0.0357	0.0352	0.0466	0.0297	0.0689	0.167	0.2094	0.1778	0.2232	0.225	0.1023	0.0489	0.71373494	-0.374076561	shadows
-74.93993722	7.61055534	0.0298	0.0306	0.0343	0.0243	0.0456	0.1113	0.1424	0.1236	0.1511	0.2389	0.0783	0.0453	0.671399594	-0.390763766	shadows
-74.94705139	7.992553463	0.0338	0.0289	0.0488	0.0288	0.1007	0.2706	0.3405	0.2482	0.3669	0.3465	0.1878	0.0933	0.792057762	-0.587489434	shadows
-74.98734345	7.923719856	0.023	0.0198	0.0219	0.0127	0.0283	0.0952	0.1388	0.1063	0.165	0.234	0.0649	0.0337	0.786554622	-0.495391705	shadows
-74.95159761	7.915304843	0.0253	0.0241	0.0267	0.0295	0.0394	0.055	0.067	0.0578	0.0666	0.119	0.0632	0.0433	0.32416953	-0.406006674	shadows
-74.92946209	7.905622912	0.027	0.0241	0.0295	0.0294	0.0417	0.0465	0.0573	0.0487	0.0584	0.0867	0.0393	0.023	0.247119078	-0.14244186	shadows
-74.95214191	7.915757186	0.0269	0.0236	0.03	0.0211	0.0382	0.0649	0.0783	0.0833	0.0787	0.0902	0.0635	0.0391	0.595785441	-0.35828877	shadows
-74.9520804	7.658680014	0.0303	0.0345	0.0376	0.0288	0.0484	0.0956	0.1151	0.1076	0.1238	0.1987	0.0752	0.0442	0.57771261	-0.333333333	shadows
-74.99913811	7.910513486	0.0413	0.0363	0.0424	0.036	0.0532	0.1013	0.1265	0.119	0.1332	0.1296	0.0916	0.0547	0.535483871	-0.367164179	shadows
-74.98952077	7.929509092	0.0387	0.0421	0.048	0.0426	0.0671	0.1094	0.134	0.1265	0.139	0.1592	0.1038	0.0576	0.496156121	-0.367588933	shadows
-74.95485571	7.988845711	0.0195	0.0277	0.0356	0.0247	0.0487	0.1177	0.1442	0.1404	0.1448	0.1525	0.0732	0.0327	0.700787402	-0.345588235	shadows
-74.95095174	8.006031815	0.0184	0.0199	0.0282	0.0156	0.0369	0.1098	0.1388	0.1594	0.1403	0.1362	0.0655	0.0274	0.821714286	-0.398078975	shadows
-74.91745377	7.608380672	0.0303	0.0338	0.0393	0.0303	0.0457	0.0881	0.1081	0.1047	0.1151	0.1334	0.0819	0.049	0.551111111	-0.351485149	shadows
-74.97717982	7.961620397	0.0204	0.0191	0.024	0.0121	0.0286	0.0754	0.0995	0.1065	0.104	0.1117	0.0476	0.0251	0.795952782	-0.329608939	shadows
-74.9048782	7.895577438	0.0162	0.0205	0.0214	0.0135	0.0285	0.079	0.1047	0.1001	0.1093	0.1244	0.0478	0.0234	0.762323944	-0.38150289	shadows
-74.98716196	7.924714865	0.0231	0.0204	0.0276	0.0163	0.0401	0.1108	0.1486	0.1275	0.1612	0.1744	0.0702	0.0333	0.773296245	-0.435582822	shadows
-74.97100635	8.009832842	0.0531	0.0501	0.0611	0.0594	0.0877	0.1428	0.1763	0.0923	0.1923	0.1441	0.1242	0.0823	0.216875412	-0.340528872	shadows
-74.98698054	7.923538933	0.0201	0.0228	0.0229	0.0131	0.0283	0.0816	0.1129	0.1046	0.1178	0.1458	0.0528	0.0269	0.77740017	-0.394980185	shadows
-74.91636445	7.615617032	0.0278	0.0314	0.0399	0.0268	0.0532	0.1228	0.1475	0.1411	0.1555	0.1987	0.0839	0.0439	0.680762359	-0.355411955	shadows
-74.99941029	7.909428015	0.0427	0.0347	0.0391	0.0276	0.0495	0.0994	0.1262	0.1221	0.1329	0.1309	0.081	0.0475	0.631262525	-0.348875937	shadows
-74.99777726	7.905086124	0.0459	0.0378	0.0458	0.0345	0.0588	0.1139	0.1403	0.139	0.1523	0.1601	0.1005	0.0575	0.602305476	-0.373889269	shadows
-74.93570915	7.988481356	0.012	0.0149	0.0136	0.0086	0.0166	0.0487	0.0671	0.0688	0.0682	0.064	0.0344	0.0181	0.777777778	-0.433333333	shadows
-74.95189902	7.659041822	0.0295	0.0306	0.036	0.028	0.0459	0.0941	0.1173	0.1114	0.1244	0.1952	0.0719	0.0429	0.598278336	-0.332715477	shadows
-74.99142598	7.934484206	0.022	0.0228	0.0342	0.0201	0.0462	0.1044	0.1239	0.118	0.1288	0.1267	0.0692	0.0355	0.708906589	-0.338491296	shadows
-74.99977319	7.909970751	0.0372	0.0364	0.0372	0.0279	0.0464	0.0753	0.0932	0.0662	0.0949	0.1444	0.0726	0.0459	0.407013815	-0.322404372	shadows
-74.93453763	7.937283276	0.0163	0.0213	0.0183	0.0178	0.0238	0.0338	0.0424	0.0403	0.0451	0.0775	0.0463	0.0319	0.387263339	-0.433436533	shadows
-74.971221	7.522905351	0.0346	0.0399	0.0478	0.0343	0.0557	0.1112	0.1338	0.1324	0.1434	0.2269	0.0906	0.0518	0.588482304	-0.309248555	shadows
-74.94696065	7.992553451	0.033	0.0222	0.0332	0.0189	0.0797	0.2264	0.2953	0.1888	0.3213	0.3339	0.1524	0.0738	0.81800674	-0.642241379	shadows
-74.91636588	7.60819955	0.0293	0.0314	0.037	0.0267	0.0462	0.0958	0.1197	0.1177	0.1284	0.1263	0.0779	0.0455	0.630193906	-0.355961706	shadows
-74.9065811	7.577984862	0.0294	0.0331	0.0404	0.0295	0.0558	0.1102	0.1319	0.1263	0.1381	0.2363	0.0837	0.0469	0.621309371	-0.348912168	shadows
-74.93553568	7.937192976	0.0208	0.0209	0.0247	0.0192	0.0347	0.0629	0.0764	0.0693	0.08	0.0966	0.0553	0.0327	0.566101695	-0.3825	shadows
-74.93544496	7.937102507	0.0211	0.0222	0.025	0.0262	0.0361	0.0582	0.0728	0.0641	0.0745	0.0966	0.0557	0.0327	0.419712071	-0.380421314	shadows
-74.97037863	7.905265992	0.0241	0.023	0.0274	0.0162	0.0324	0.073	0.0944	0.0897	0.096	0.1111	0.0505	0.0307	0.694050992	-0.296534018	shadows
-74.98653498	7.670984617	0.039	0.0364	0.0457	0.0305	0.0648	0.1676	0.2168	0.19	0.2347	0.2599	0.1039	0.0494	0.723356009	-0.389037433	shadows
-74.97754266	7.963519986	0.0164	0.016	0.0192	0.0118	0.0226	0.0686	0.0853	0.0789	0.0875	0.083	0.0426	0.0225	0.739801544	-0.378640777	shadows
-74.95271502	7.65940374	0.0284	0.0294	0.0362	0.0285	0.0459	0.0847	0.0989	0.1001	0.1056	0.1836	0.0736	0.0462	0.556765163	-0.340619308	shadows
-74.90866596	7.997612269	0.0215	0.019	0.0267	0.016	0.0458	0.1241	0.1624	0.1067	0.1751	0.2553	0.0796	0.0377	0.739201304	-0.497648166	shadows
-74.9547649	7.98947889	0.0203	0.0199	0.0273	0.0206	0.0404	0.0815	0.1019	0.0791	0.105	0.1143	0.0625	0.0316	0.586760281	-0.391982183	shadows
-74.99877522	7.907618895	0.0433	0.0394	0.0437	0.0348	0.0536	0.1063	0.1349	0.125	0.1388	0.1453	0.092	0.0525	0.564455569	-0.355932203	shadows
-74.97173953	7.904723351	0.025	0.0266	0.0251	0.0218	0.0304	0.0611	0.0751	0.0648	0.0791	0.1294	0.0511	0.0323	0.496535797	-0.341207349	shadows
-74.95286756	7.917204562	0.0235	0.0265	0.0297	0.0305	0.044	0.0663	0.0821	0.0773	0.0863	0.0944	0.0761	0.0443	0.434137291	-0.438563327	shadows
-74.96312008	7.912411432	0.0258	0.0321	0.0327	0.026	0.0386	0.0734	0.0885	0.0847	0.0942	0.1041	0.0611	0.0369	0.530261969	-0.302771855	shadows
-74.98625471	7.923629366	0.0177	0.0201	0.0208	0.0127	0.0277	0.075	0.102	0.0914	0.101	0.1073	0.0479	0.0268	0.756003842	-0.394468705	shadows
-74.97421207	7.525166976	0.0414	0.0412	0.0485	0.0338	0.0649	0.1431	0.1776	0.1664	0.1917	0.3094	0.1043	0.0577	0.662337662	-0.365183246	shadows
-74.95277693	7.916299993	0.0234	0.0224	0.0234	0.0217	0.0342	0.0513	0.0632	0.0578	0.0668	0.0794	0.0613	0.0398	0.45408805	-0.447461629	shadows
-74.95049784	8.007388593	0.0218	0.0254	0.0334	0.0277	0.0466	0.0931	0.1137	0.1023	0.1172	0.1503	0.0773	0.0416	0.573846154	-0.396567299	shadows
-74.93535421	7.937283404	0.0198	0.0229	0.0226	0.0251	0.0313	0.0505	0.0626	0.0508	0.0631	0.0868	0.0538	0.0364	0.338603426	-0.408376963	shadows
-75.00013609	7.913046253	0.0164	0.0339	0.0419	0.03	0.0301	0.0593	0.0747	0.1282	0.0801	0.1002	0.0554	0.033	0.620733249	-0.138746146	shadows
-74.93453756	7.937735555	0.0156	0.0161	0.0176	0.0168	0.0236	0.0331	0.0392	0.0397	0.0448	0.0573	0.0472	0.0334	0.405309735	-0.456790123	shadows
-74.98779689	7.930323147	0.0286	0.0293	0.0393	0.0314	0.049	0.0891	0.1077	0.1048	0.1166	0.1331	0.078	0.0461	0.538913363	-0.329923274	shadows
-74.93571686	7.93900212	0.0168	0.0204	0.0217	0.0245	0.0315	0.0579	0.072	0.0622	0.0768	0.0725	0.0554	0.0342	0.434832757	-0.437094682	shadows
-74.98652668	7.930232652	0.0343	0.0376	0.0462	0.0408	0.0639	0.1162	0.1366	0.1248	0.1437	0.1752	0.1002	0.055	0.507246377	-0.368852459	shadows
-74.9872527	7.924353045	0.0227	0.0259	0.042	0.0197	0.0562	0.1697	0.2203	0.2283	0.2329	0.2191	0.0991	0.0441	0.841129032	-0.404677534	shadows
-74.9391573	7.988843699	0.0138	0.0157	0.0187	0.0111	0.0249	0.0656	0.0928	0.0895	0.097	0.147	0.0453	0.021	0.779324056	-0.415625	shadows
-74.93915711	7.990110077	0.0172	0.0165	0.0213	0.0111	0.041	0.1218	0.1643	0.1477	0.1697	0.2216	0.0791	0.0365	0.860201511	-0.575697211	shadows
-74.91401943	7.999693893	0.0251	0.0207	0.0299	0.018	0.0501	0.1383	0.1825	0.1539	0.1918	0.2064	0.0785	0.0335	0.790575916	-0.448339483	shadows
-74.99786798	7.906352508	0.0421	0.0365	0.0429	0.0342	0.0574	0.1161	0.1451	0.1342	0.1527	0.1504	0.0995	0.0572	0.593824228	-0.39747191	shadows
-74.93966509	7.611640788	0.0313	0.0315	0.0345	0.0236	0.0467	0.1136	0.1459	0.126	0.1525	0.2454	0.0802	0.0437	0.684491979	-0.398430689	shadows
-74.93434801	7.988481142	0.0145	0.0207	0.0255	0.013	0.0393	0.1261	0.1664	0.1481	0.1798	0.1721	0.0773	0.0322	0.838609559	-0.503891051	shadows
-74.97118785	8.009742399	0.0513	0.037	0.0457	0.0374	0.0606	0.0961	0.121	0.106	0.1332	0.1293	0.0889	0.0577	0.478382148	-0.320950966	shadows
-74.99904738	7.911327589	0.039	0.0293	0.0332	0.0235	0.0455	0.1002	0.1284	0.1189	0.1346	0.1432	0.0797	0.0462	0.66994382	-0.411868911	shadows
-74.98933932	7.929328175	0.0395	0.039	0.0471	0.0419	0.0706	0.1181	0.1373	0.1249	0.1439	0.1732	0.1088	0.0599	0.497601918	-0.395766517	shadows
-74.96974352	7.905899138	0.03	0.0229	0.0294	0.0215	0.0375	0.0688	0.0867	0.0762	0.0885	0.1232	0.0613	0.0369	0.559877175	-0.351708931	shadows
-74.95280566	7.659675121	0.028	0.0339	0.0374	0.0339	0.0465	0.0823	0.1019	0.09	0.1059	0.1835	0.0742	0.0462	0.452784504	-0.329749104	shadows
-74.93480945	7.939635169	0.0129	0.0105	0.0132	0.0081	0.0198	0.0567	0.0809	0.0657	0.0847	0.0965	0.0424	0.0242	0.780487805	-0.525179856	shadows
-74.99913811	7.909428015	0.0424	0.0341	0.0382	0.0281	0.0495	0.0926	0.1181	0.1155	0.1213	0.1261	0.081	0.0484	0.608635097	-0.359060403	shadows
-74.9521418	7.9167522	0.0263	0.0267	0.0279	0.0373	0.0478	0.0702	0.0845	0.0683	0.0881	0.0914	0.0771	0.0482	0.293560606	-0.468571429	shadows
-74.95214192	7.91566673	0.0271	0.0261	0.0295	0.0265	0.0409	0.0662	0.0773	0.0733	0.0788	0.0946	0.0672	0.0391	0.468937876	-0.389865564	shadows
-74.93435582	7.939454186	0.0187	0.0093	0.0103	0.0079	0.0179	0.054	0.0753	0.0648	0.0814	0.1005	0.0375	0.023	0.782668501	-0.569037657	shadows
-74.90766893	7.578075551	0.0286	0.0337	0.041	0.0272	0.0552	0.1189	0.1434	0.1341	0.1514	0.2217	0.0796	0.0439	0.662740236	-0.320066335	shadows
-74.95235226	7.660127356	0.0293	0.0323	0.0368	0.0287	0.0491	0.0896	0.111	0.1049	0.1136	0.1647	0.0752	0.0465	0.570359281	-0.342857143	shadows
-74.97574581	7.653525947	0.034	0.0343	0.0446	0.0301	0.0646	0.1676	0.2081	0.2073	0.2169	0.2116	0.1129	0.052	0.746419545	-0.433650794	shadows
-74.93906654	7.988934141	0.0133	0.0137	0.0152	0.0098	0.0231	0.0638	0.0912	0.0803	0.093	0.1415	0.0443	0.0206	0.782463929	-0.48907563	shadows
-74.94705233	7.985317019	0.0146	0.016	0.0201	0.0126	0.0241	0.0499	0.0636	0.0613	0.0673	0.0586	0.041	0.0223	0.658998647	-0.342062193	shadows
-74.91582065	7.614712356	0.0276	0.0322	0.0372	0.0257	0.0482	0.1086	0.1315	0.1272	0.1406	0.1628	0.076	0.0417	0.66383257	-0.342756184	shadows
-74.97853857	8.005491439	0.0252	0.0406	0.0423	0.0293	0.0378	0.061	0.0708	0.0949	0.0684	0.0776	0.0488	0.0274	0.528180354	-0.071350165	shadows
-74.95467414	7.989569336	0.0203	0.0246	0.0307	0.0236	0.0438	0.0878	0.1101	0.0839	0.1153	0.111	0.0708	0.0358	0.560930233	-0.395073892	shadows
-74.97681675	7.963881769	0.0275	0.0205	0.0209	0.0135	0.0271	0.0773	0.1054	0.0959	0.1102	0.1275	0.048	0.0251	0.753199269	-0.393323657	shadows
-74.95086082	8.007479092	0.0217	0.0262	0.032	0.0279	0.0505	0.0914	0.1187	0.088	0.1298	0.1546	0.0855	0.0488	0.518550475	-0.455319149	shadows
-74.95150678	7.916209392	0.0307	0.0283	0.0273	0.0326	0.0443	0.056	0.0684	0.0603	0.0699	0.0976	0.0753	0.0511	0.298170075	-0.467836257	shadows
-74.91727243	7.608471095	0.0306	0.0343	0.0408	0.0311	0.0472	0.0903	0.1103	0.1061	0.1165	0.129	0.0823	0.0487	0.54664723	-0.337124289	shadows
-74.93897578	7.989024584	0.0127	0.0159	0.0164	0.0098	0.0217	0.0637	0.0923	0.0779	0.0938	0.1279	0.0456	0.0207	0.776510832	-0.470967742	shadows
-74.91826975	7.608199912	0.0295	0.0328	0.037	0.0309	0.047	0.0909	0.1105	0.1108	0.1237	0.1289	0.0864	0.0512	0.563867325	-0.400324149	shadows
-74.99133525	7.934484204	0.0219	0.0238	0.0339	0.0208	0.0465	0.1064	0.1262	0.1202	0.1312	0.1274	0.0711	0.0367	0.704964539	-0.354285714	shadows
-74.9518695	7.917747183	0.032	0.0245	0.0438	0.0255	0.0608	0.1486	0.1944	0.1973	0.208	0.2397	0.104	0.0515	0.771095153	-0.407307172	shadows
-74.97935523	8.006576946	0.0275	0.0226	0.0262	0.0211	0.034	0.0594	0.0718	0.0557	0.0722	0.0724	0.0438	0.0273	0.450520833	-0.251428571	shadows
-74.91836039	7.608290387	0.0309	0.036	0.0408	0.0342	0.049	0.0971	0.1171	0.1089	0.1228	0.1439	0.0897	0.0543	0.522012579	-0.374712644	shadows
-74.93535404	7.938368873	0.017	0.0151	0.0178	0.0141	0.0226	0.0484	0.0655	0.0533	0.0689	0.0621	0.0459	0.0293	0.581602374	-0.441130298	shadows
-74.99904738	7.911418045	0.039	0.0308	0.0351	0.023	0.0474	0.1002	0.1263	0.1224	0.1321	0.146	0.0843	0.0488	0.683631362	-0.412060302	shadows
-74.99904739	7.908523455	0.0494	0.0357	0.043	0.0304	0.0527	0.1087	0.1359	0.1245	0.1431	0.1508	0.0918	0.0534	0.607488702	-0.362017804	shadows
-74.93661672	7.987486485	0.0124	0.0169	0.0169	0.0107	0.0191	0.0534	0.0712	0.0832	0.0745	0.0885	0.0365	0.0202	0.772097977	-0.367041199	shadows
-74.90297306	7.895486545	0.0223	0.0354	0.037	0.0428	0.0485	0.0623	0.0696	0.0656	0.0756	0.0917	0.0673	0.0433	0.210332103	-0.29050815	shadows
-74.95476488	7.989659801	0.0209	0.0254	0.0306	0.0234	0.0456	0.0915	0.1124	0.0966	0.1162	0.1217	0.0704	0.0356	0.61	-0.394059406	shadows
-74.97708909	7.961529936	0.0199	0.0186	0.0238	0.0123	0.0296	0.0836	0.1094	0.1186	0.1121	0.1127	0.0484	0.0253	0.812070283	-0.340720222	shadows
-74.99904739	7.909428014	0.0416	0.0326	0.0361	0.0277	0.0501	0.0907	0.1161	0.1172	0.1175	0.1249	0.082	0.0491	0.617667357	-0.388653683	shadows
-74.97228383	7.905356579	0.0241	0.0227	0.0238	0.0152	0.0306	0.0723	0.0938	0.0836	0.0959	0.1295	0.0498	0.0294	0.692307692	-0.35326087	shadows
-74.90848441	7.997883595	0.0207	0.024	0.039	0.0209	0.0666	0.2029	0.2669	0.1804	0.2948	0.2703	0.1264	0.0584	0.792349727	-0.528415961	shadows
-74.97717734	8.00621501	0.0225	0.0229	0.0255	0.0185	0.0302	0.0519	0.0646	0.0658	0.0643	0.0636	0.0431	0.0266	0.56109134	-0.256559767	shadows
-74.99886594	7.908252087	0.05	0.0383	0.0431	0.0342	0.0537	0.0997	0.1242	0.117	0.1326	0.1481	0.0934	0.0546	0.547619048	-0.368498168	shadows
-74.99922883	7.912141693	0.0386	0.0341	0.0426	0.0241	0.0479	0.1073	0.1343	0.1329	0.1432	0.1502	0.0775	0.0419	0.692993631	-0.290591174	shadows
-74.93625371	7.987757795	0.0117	0.0157	0.0163	0.0086	0.0171	0.0508	0.0718	0.0736	0.0733	0.0626	0.0344	0.0192	0.790754258	-0.357001972	shadows
-74.9345374	7.938730568	0.0135	0.0142	0.0139	0.0157	0.0219	0.0289	0.0384	0.0361	0.0431	0.06	0.0456	0.035	0.393822394	-0.532773109	shadows
-74.9516882	7.91648078	0.0306	0.0286	0.0285	0.0336	0.0479	0.0547	0.0654	0.0574	0.0697	0.0953	0.0734	0.052	0.261538462	-0.440628067	shadows
-74.95280577	7.658680094	0.0292	0.0329	0.0405	0.0286	0.0469	0.0936	0.118	0.1147	0.1241	0.1878	0.0716	0.0435	0.600837404	-0.277430865	shadows
-74.93661658	7.98839104	0.01	0.0119	0.0135	0.0075	0.0148	0.0422	0.0633	0.0563	0.0667	0.0588	0.0323	0.0182	0.764890282	-0.410480349	shadows
-74.95498173	7.660037182	0.0313	0.0342	0.0346	0.0287	0.0488	0.1053	0.1296	0.1161	0.1382	0.2173	0.0789	0.0437	0.60359116	-0.39030837	shadows
-74.93480965	7.938368788	0.0161	0.0213	0.0194	0.0216	0.0269	0.0314	0.0408	0.0378	0.0435	0.0555	0.0556	0.0441	0.272727273	-0.482666667	shadows
-74.90839366	7.997883575	0.0201	0.0194	0.0277	0.0158	0.0579	0.1741	0.2302	0.1316	0.2548	0.2487	0.1096	0.051	0.785617368	-0.596504006	shadows
-74.92946207	7.905713367	0.0272	0.0275	0.0343	0.0311	0.0379	0.0414	0.05	0.0676	0.0521	0.0941	0.0362	0.0213	0.369807497	-0.026950355	shadows
-74.90406122	7.897657737	0.0095	0.0148	0.0136	0.0092	0.0203	0.0495	0.064	0.0604	0.072	0.0756	0.0381	0.0209	0.735632184	-0.473887814	shadows
-74.9358898	7.99381826	0.043	0.0303	0.0394	0.0283	0.0581	0.1213	0.1496	0.1209	0.1584	0.2132	0.089	0.0454	0.620643432	-0.386292835	shadows
-74.99051866	7.9354792	0.0303	0.0326	0.0396	0.0227	0.0456	0.1109	0.1392	0.1353	0.1457	0.1455	0.0795	0.0454	0.712658228	-0.335012594	shadows
-74.98652669	7.930142196	0.0339	0.0356	0.0441	0.0385	0.0638	0.1165	0.1389	0.1262	0.1465	0.1709	0.0994	0.0544	0.532483303	-0.385365854	shadows
-74.93517246	7.939092491	0.0153	0.0173	0.0188	0.0162	0.0272	0.0468	0.0578	0.063	0.0636	0.0678	0.0526	0.0367	0.590909091	-0.473389356	shadows
-74.95367609	7.988574214	0.0189	0.0219	0.0232	0.0166	0.0295	0.0712	0.0929	0.0897	0.0946	0.1114	0.0494	0.0258	0.687676388	-0.360881543	shadows
-74.9697435	7.90608005	0.0329	0.0279	0.0326	0.0256	0.041	0.0714	0.0893	0.0804	0.0926	0.1291	0.0655	0.0399	0.516981132	-0.335372069	shadows
-74.94904833	7.987850025	0.019	0.022	0.0313	0.0198	0.0483	0.1141	0.1474	0.1184	0.1473	0.152	0.0723	0.0376	0.713458755	-0.395752896	shadows
-74.90515036	7.8955775	0.0181	0.017	0.0214	0.0137	0.0316	0.0725	0.096	0.0902	0.0977	0.1459	0.0502	0.0232	0.736284889	-0.402234637	shadows
-74.97083224	7.90535648	0.0234	0.0219	0.0246	0.0157	0.0308	0.0784	0.1036	0.0832	0.1063	0.1058	0.0547	0.0316	0.682507583	-0.379571248	shadows
-74.95250474	7.916390418	0.0242	0.0259	0.0277	0.0288	0.0365	0.0525	0.0656	0.0607	0.0681	0.08	0.0633	0.0397	0.356424581	-0.391208791	shadows
-74.9356184	7.988481341	0.0124	0.0162	0.0141	0.01	0.017	0.0498	0.0654	0.0662	0.0704	0.065	0.0343	0.0182	0.737532808	-0.417355372	shadows
-74.947697	7.910419755	0.0232	0.0218	0.0254	0.0153	0.032	0.0804	0.1074	0.0915	0.117	0.1505	0.0536	0.0285	0.713483146	-0.356962025	shadows
-74.97908301	8.006215111	0.0215	0.0207	0.0234	0.0165	0.0269	0.0472	0.0599	0.0565	0.0627	0.0589	0.0378	0.0235	0.547945205	-0.235294118	shadows
-74.99941029	7.908613912	0.0465	0.0406	0.0479	0.0355	0.0582	0.1117	0.1392	0.1273	0.1466	0.1693	0.0964	0.054	0.563882064	-0.336105336	shadows
-74.95180836	7.658951355	0.0306	0.0348	0.0404	0.0331	0.0491	0.0934	0.1155	0.1095	0.1208	0.2036	0.0751	0.0457	0.535764376	-0.3004329	shadows
-74.95226166	7.659494147	0.0288	0.0316	0.0361	0.0306	0.0493	0.0882	0.1078	0.0978	0.113	0.185	0.0761	0.0473	0.523364486	-0.356506239	shadows
-74.94904834	7.987759569	0.0179	0.0216	0.0269	0.0171	0.042	0.0975	0.1307	0.0953	0.1284	0.1357	0.0642	0.0342	0.695729537	-0.409440176	shadows
-74.9638458	7.913406511	0.0231	0.0246	0.0309	0.0235	0.0428	0.0916	0.1104	0.0883	0.1179	0.1273	0.0752	0.0431	0.57960644	-0.417530631	shadows
-74.90658112	7.577894404	0.029	0.0336	0.0417	0.0289	0.0555	0.1114	0.1329	0.125	0.1393	0.2321	0.0828	0.0457	0.624431449	-0.330120482	shadows
-74.95271503	7.659313283	0.0284	0.0318	0.0346	0.0274	0.0457	0.0875	0.1052	0.1044	0.1107	0.1835	0.0718	0.0455	0.584218513	-0.34962406	shadows
-74.95362181	7.658680183	0.0286	0.0318	0.0357	0.0265	0.0434	0.0894	0.1156	0.1026	0.1195	0.189	0.0696	0.0389	0.589465531	-0.321937322	shadows
-74.98779705	7.92480534	0.0257	0.0226	0.031	0.0193	0.0603	0.183	0.2436	0.1741	0.2577	0.2769	0.1113	0.0541	0.80041365	-0.564300773	shadows
-74.98626297	7.670441866	0.0409	0.0405	0.0537	0.0391	0.0655	0.1431	0.1746	0.1638	0.1789	0.2322	0.1016	0.0532	0.614588467	-0.308435287	shadows
-74.95325904	7.659494257	0.0277	0.0321	0.0354	0.0272	0.0451	0.0826	0.1018	0.0978	0.1072	0.1802	0.0713	0.0441	0.5648	-0.336457357	shadows
-74.95276853	7.989750033	0.026	0.0184	0.0231	0.0153	0.034	0.0743	0.0958	0.096	0.1048	0.1174	0.0613	0.0363	0.725067385	-0.452606635	shadows
-74.97146734	7.904904244	0.024	0.0228	0.0232	0.0212	0.03	0.0503	0.0665	0.0536	0.0709	0.1068	0.0496	0.034	0.43315508	-0.362637363	shadows
-74.96384579	7.913496966	0.0234	0.0257	0.0321	0.0249	0.0484	0.1011	0.1244	0.0904	0.133	0.1349	0.0813	0.0463	0.568083261	-0.433862434	shadows
-74.9720368	7.522724489	0.0357	0.041	0.047	0.0393	0.0604	0.1116	0.1345	0.1256	0.1405	0.2325	0.0958	0.056	0.523347483	-0.341736695	shadows
-74.9163659	7.608109092	0.0295	0.0325	0.0373	0.0292	0.0466	0.0937	0.1164	0.1134	0.1242	0.1273	0.0782	0.0459	0.590462833	-0.354112554	shadows
-74.91591131	7.614712373	0.0274	0.0308	0.037	0.026	0.0487	0.1071	0.1304	0.1273	0.14	0.1672	0.077	0.0421	0.660795825	-0.350877193	shadows
-74.95205102	7.917204469	0.0267	0.0313	0.0409	0.0371	0.0581	0.0915	0.1084	0.1063	0.1128	0.1227	0.0937	0.0513	0.482566248	-0.392273403	shadows
-74.93897594	7.987939117	0.0161	0.0175	0.0211	0.0119	0.0326	0.0956	0.1241	0.1134	0.1262	0.1544	0.0575	0.0246	0.810055866	-0.463104326	shadows
-74.97203679	7.522905404	0.0345	0.0394	0.0433	0.0333	0.0571	0.1131	0.1357	0.1331	0.1449	0.2316	0.0918	0.0522	0.599759615	-0.358993338	shadows
-74.9519605	7.915395341	0.0262	0.027	0.0301	0.0308	0.0426	0.0614	0.0756	0.0589	0.0802	0.1	0.0687	0.0421	0.313266444	-0.390688259	shadows
-74.93508194	7.93773564	0.0183	0.0214	0.0198	0.0232	0.0266	0.0349	0.0446	0.0413	0.0471	0.0594	0.0571	0.0403	0.280620155	-0.485045514	shadows
-74.91411017	7.999693912	0.0252	0.0223	0.0323	0.0181	0.0467	0.1262	0.1695	0.165	0.1817	0.198	0.074	0.0335	0.802293829	-0.392285983	shadows
-74.93462823	7.938097392	0.0155	0.0172	0.0174	0.0196	0.0241	0.0294	0.0374	0.0357	0.0408	0.0543	0.0531	0.0395	0.291139241	-0.506382979	shadows
-74.98688982	7.923267563	0.0207	0.0204	0.0222	0.0138	0.0294	0.0797	0.1085	0.096	0.1147	0.1491	0.0532	0.0265	0.74863388	-0.411140584	shadows
-74.96312003	7.912954168	0.0217	0.0243	0.0292	0.0218	0.0352	0.0697	0.0864	0.0846	0.0898	0.0957	0.059	0.0353	0.590225564	-0.337868481	shadows
-74.9474248	7.910600633	0.0214	0.0201	0.0229	0.0134	0.0291	0.0727	0.1002	0.0926	0.1018	0.12	0.05	0.0245	0.747169811	-0.371742112	shadows
-74.97173939	7.906713381	0.0316	0.0273	0.0374	0.0353	0.0799	0.1335	0.1665	0.0868	0.1988	0.1261	0.1197	0.0825	0.421785422	-0.523870146	shadows
-74.93508191	7.937916552	0.0181	0.0213	0.0195	0.0218	0.0255	0.0323	0.0387	0.0421	0.0448	0.0577	0.0561	0.0402	0.317683881	-0.484126984	shadows
-74.95253359	7.660217833	0.028	0.0323	0.036	0.0322	0.0465	0.0892	0.1121	0.1043	0.1147	0.1491	0.0726	0.0448	0.528205128	-0.337016575	shadows
-74.97203679	7.522814946	0.0351	0.0409	0.0457	0.0349	0.0578	0.1122	0.1345	0.1285	0.1426	0.232	0.0933	0.0543	0.572827417	-0.342446043	shadows
-74.98716179	7.930323128	0.0296	0.0326	0.0407	0.0322	0.0613	0.1112	0.139	0.1098	0.1486	0.1476	0.098	0.0557	0.546478873	-0.413121846	shadows
-74.96983422	7.906170513	0.0318	0.0279	0.0332	0.0265	0.0402	0.0707	0.0895	0.0819	0.0947	0.1289	0.0642	0.0395	0.511070111	-0.318275154	shadows
-74.98626296	7.670984608	0.038	0.0358	0.0437	0.0281	0.0543	0.1371	0.1819	0.1581	0.1958	0.2114	0.0881	0.044	0.698174006	-0.336874052	shadows
-74.97239936	7.522814969	0.0354	0.0405	0.0515	0.0365	0.0609	0.1259	0.1497	0.1428	0.1594	0.2578	0.0961	0.0539	0.592861127	-0.302168022	shadows
-74.93443876	7.988481156	0.0138	0.0176	0.0232	0.0127	0.0327	0.1031	0.137	0.1223	0.1453	0.1473	0.063	0.027	0.811851852	-0.461716937	shadows
-74.97212746	7.522453122	0.0375	0.0445	0.0515	0.0375	0.064	0.1286	0.1548	0.1494	0.1572	0.234	0.1023	0.058	0.598715891	-0.33029909	shadows
-74.93535409	7.93800705	0.0171	0.0204	0.0204	0.0217	0.0272	0.047	0.0593	0.053	0.0645	0.0664	0.0499	0.0321	0.419009371	-0.419630156	shadows
-74.94851129	7.928420572	0.0222	0.0233	0.0273	0.0216	0.037	0.0652	0.0776	0.0865	0.0845	0.1108	0.0587	0.036	0.600370028	-0.365116279	shadows
-74.95235233	7.659494157	0.0287	0.0327	0.039	0.0361	0.0522	0.0867	0.1077	0.1012	0.1116	0.1847	0.0773	0.0479	0.47414421	-0.329320722	shadows
-74.91582062	7.61489327	0.0272	0.0322	0.0364	0.0257	0.0471	0.1064	0.1338	0.1282	0.1403	0.1629	0.0742	0.0415	0.666016894	-0.341772152	shadows
-74.98616396	7.92435301	0.019	0.0177	0.0197	0.0119	0.0285	0.0789	0.1081	0.0996	0.1116	0.1166	0.0537	0.0279	0.786547085	-0.463215259	shadows
-74.95458338	7.989750237	0.0202	0.025	0.0309	0.0266	0.0455	0.0919	0.1098	0.0943	0.1169	0.1148	0.0707	0.0363	0.559966915	-0.391732283	shadows
-74.93570827	7.994089598	0.036	0.0268	0.0374	0.0266	0.0656	0.1446	0.1906	0.1669	0.1994	0.2439	0.108	0.0612	0.725064599	-0.485557084	shadows
-74.93553524	7.939997105	0.0192	0.0142	0.0187	0.012	0.0335	0.0931	0.1229	0.1038	0.1312	0.1649	0.0647	0.0337	0.792746114	-0.551558753	shadows
-75.00004536	7.912774885	0.0206	0.0288	0.0324	0.021	0.0478	0.1117	0.1419	0.141	0.1515	0.1063	0.0817	0.0472	0.740740741	-0.432077125	shadows
-74.97237456	7.905266129	0.0254	0.0214	0.0252	0.0153	0.0322	0.0748	0.0952	0.0851	0.0978	0.1367	0.0502	0.0298	0.695219124	-0.331564987	shadows
-74.93957473	7.609469804	0.0281	0.0296	0.0345	0.0249	0.0464	0.1035	0.1293	0.1244	0.1378	0.2201	0.0747	0.0427	0.666443403	-0.368131868	shadows
-74.9049689	7.895667915	0.0163	0.0194	0.022	0.0126	0.0272	0.08	0.0983	0.0963	0.1036	0.1268	0.0483	0.0225	0.768595041	-0.374110953	shadows
-74.93444655	7.9394542	0.0152	0.0119	0.0116	0.0079	0.0178	0.0515	0.0733	0.0676	0.0809	0.0916	0.0388	0.0228	0.790728477	-0.53968254	shadows
-74.91781639	7.608471198	0.032	0.0368	0.0424	0.0366	0.0528	0.0994	0.1197	0.1125	0.128	0.1543	0.0933	0.055	0.509054326	-0.375092115	shadows
-74.94750606	7.985136165	0.0157	0.0169	0.0186	0.0145	0.0257	0.05	0.0634	0.0548	0.0654	0.0704	0.0419	0.0234	0.581529582	-0.385123967	shadows
-74.97065084	7.904723276	0.0242	0.0239	0.0276	0.0179	0.0341	0.069	0.0955	0.0886	0.0973	0.1111	0.0522	0.0308	0.663849765	-0.308270677	shadows
-74.95168834	7.915214398	0.0263	0.0255	0.0291	0.0292	0.0407	0.055	0.0664	0.0602	0.0686	0.1394	0.0635	0.043	0.346756152	-0.371490281	shadows
-74.94895775	7.98649318	0.0174	0.0177	0.0207	0.0133	0.0268	0.0622	0.0755	0.0706	0.0795	0.0959	0.0418	0.0213	0.6829559	-0.3376	shadows
-74.94860202	7.928420583	0.0226	0.0254	0.0289	0.025	0.037	0.0654	0.0777	0.0779	0.0827	0.1135	0.0596	0.0349	0.514091351	-0.346892655	shadows
-74.93499108	7.938549728	0.0172	0.019	0.0188	0.0218	0.0276	0.0352	0.0451	0.0391	0.0477	0.0563	0.0549	0.0418	0.28407225	-0.489823609	shadows
-74.93561754	7.993999128	0.0428	0.0354	0.0509	0.0305	0.0638	0.1435	0.1855	0.2084	0.195	0.2397	0.1037	0.0563	0.744663039	-0.34152652	shadows
-74.91093378	8.001230982	0.0238	0.0219	0.0291	0.0163	0.0402	0.1038	0.1315	0.1278	0.1383	0.1455	0.0653	0.0318	0.773768217	-0.383474576	shadows
-74.93897593	7.988029573	0.0156	0.0184	0.026	0.0129	0.0316	0.0902	0.1169	0.1478	0.1199	0.1402	0.0541	0.0238	0.839452396	-0.350811486	shadows
-74.94751556	7.910329276	0.0228	0.024	0.0254	0.0155	0.0316	0.073	0.0956	0.0897	0.1017	0.1354	0.0484	0.0266	0.705323194	-0.311653117	shadows
-74.91863237	7.608290438	0.0324	0.0343	0.0402	0.0321	0.0536	0.0934	0.113	0.111	0.1206	0.1608	0.0944	0.0576	0.551362683	-0.402674591	shadows
-74.93906657	7.98875323	0.0133	0.0171	0.0199	0.0103	0.0265	0.0747	0.1001	0.1114	0.0996	0.1252	0.0467	0.02	0.830731306	-0.402402402	shadows
-74.97183015	7.906170652	0.0255	0.0189	0.0213	0.0145	0.0295	0.0704	0.0961	0.0806	0.0975	0.1199	0.0483	0.028	0.695057834	-0.387931034	shadows
-74.97430271	7.525166981	0.0422	0.0436	0.0494	0.0367	0.0668	0.1447	0.1758	0.1656	0.1851	0.3096	0.1094	0.0609	0.637172516	-0.377833753	shadows
-74.93480982	7.937283319	0.0177	0.0212	0.0203	0.0206	0.0269	0.0353	0.0438	0.0468	0.0485	0.077	0.0548	0.0381	0.388724036	-0.459387483	shadows
-74.99786799	7.905086125	0.0457	0.0391	0.0448	0.0349	0.0586	0.1103	0.1349	0.1325	0.1504	0.1592	0.1025	0.0597	0.583034648	-0.391717583	shadows
-74.94750577	7.987397554	0.016	0.0174	0.0223	0.0117	0.0303	0.0825	0.1118	0.0936	0.1144	0.1214	0.0559	0.031	0.777777778	-0.429667519	shadows
-74.95262428	7.660036929	0.028	0.0318	0.0354	0.0276	0.0474	0.0874	0.1051	0.0976	0.1128	0.1645	0.0731	0.0453	0.559105431	-0.347465438	shadows
-74.9709156	8.009923291	0.0562	0.0633	0.0916	0.0909	0.1079	0.1671	0.2011	0.1347	0.2155	0.1424	0.1447	0.0898	0.194148936	-0.224714346	shadows
-74.99741437	7.905538402	0.0461	0.0411	0.0502	0.0424	0.0667	0.1218	0.1479	0.1341	0.1551	0.1759	0.1115	0.0636	0.519546742	-0.379097093	shadows
-74.935082	7.937373817	0.019	0.0211	0.0199	0.0218	0.0265	0.0348	0.0466	0.0432	0.0499	0.0725	0.0572	0.0407	0.329230769	-0.483787289	shadows
-74.93435585	7.939273274	0.0144	0.0081	0.0121	0.0072	0.0191	0.0537	0.0811	0.075	0.084	0.0881	0.0385	0.023	0.824817518	-0.52173913	shadows
-74.98590023	7.67207008	0.0354	0.029	0.0376	0.0265	0.0486	0.122	0.1568	0.146	0.1614	0.2019	0.0804	0.0437	0.692753623	-0.362711864	shadows
-74.95262427	7.660127386	0.0278	0.0308	0.0376	0.0301	0.0466	0.0899	0.1093	0.1019	0.1164	0.1581	0.0727	0.0448	0.543939394	-0.318223028	shadows
-74.93924773	7.99092419	0.0214	0.0219	0.0335	0.0172	0.0673	0.2234	0.3022	0.216	0.3283	0.328	0.1325	0.0598	0.852487136	-0.596385542	shadows
-74.95214173	7.917294935	0.0263	0.0309	0.0372	0.0385	0.0649	0.098	0.1122	0.0949	0.1178	0.128	0.1003	0.0548	0.422788606	-0.458909091	shadows
-74.90387928	7.899828635	0.0143	0.0194	0.0233	0.0167	0.0338	0.0729	0.0874	0.084	0.0952	0.1021	0.0542	0.0281	0.668321748	-0.398709677	shadows
-74.93652585	7.988300571	0.01	0.0125	0.0117	0.0068	0.0149	0.0418	0.062	0.055	0.0645	0.058	0.0318	0.0187	0.779935275	-0.462068966	shadows
-74.96203136	7.912592246	0.0276	0.0266	0.0346	0.0207	0.0446	0.1014	0.123	0.145	0.1273	0.162	0.0657	0.0352	0.750150875	-0.310069791	shadows
-74.90803153	7.578166085	0.0284	0.0341	0.0459	0.0285	0.058	0.1236	0.1487	0.1516	0.1536	0.2155	0.0849	0.0441	0.683509162	-0.298165138	shadows
-74.95280571	7.659222836	0.0284	0.0317	0.0351	0.0263	0.0449	0.0906	0.1119	0.1061	0.1158	0.1834	0.0697	0.0442	0.602719033	-0.330152672	shadows
-74.9040612	7.897748192	0.0097	0.0131	0.0156	0.01	0.0203	0.0498	0.0663	0.0634	0.0704	0.0755	0.0384	0.021	0.727520436	-0.422222222	shadows
-74.91627526	7.608018618	0.03	0.0325	0.038	0.0276	0.0481	0.0939	0.1158	0.107	0.1242	0.1308	0.0779	0.0465	0.589895988	-0.344262295	shadows
-74.95250473	7.916480874	0.0239	0.0236	0.0275	0.0303	0.036	0.0546	0.0682	0.0557	0.0705	0.0803	0.063	0.0385	0.295348837	-0.392265193	shadows
-74.99841232	7.90770935	0.0785	0.0346	0.0369	0.0282	0.0513	0.1029	0.1326	0.1338	0.1371	0.1679	0.0916	0.0526	0.651851852	-0.425680934	shadows
-74.99931956	7.910603942	0.0421	0.0316	0.0354	0.0265	0.0488	0.1012	0.1256	0.125	0.13	0.1298	0.0852	0.0506	0.650165017	-0.412935323	shadows
-74.93906669	7.987939131	0.0162	0.0192	0.0229	0.0112	0.03	0.0887	0.1126	0.113	0.1161	0.1568	0.0518	0.0232	0.819645733	-0.386880857	shadows
-74.9979587	7.907257068	0.0777	0.0359	0.0433	0.0392	0.0587	0.1059	0.1326	0.1122	0.1377	0.1698	0.105	0.0658	0.482166446	-0.41604855	shadows
-74.90288209	7.896571994	0.0129	0.0156	0.0163	0.0118	0.0225	0.0511	0.07	0.0603	0.0753	0.0904	0.0424	0.0244	0.672676838	-0.444633731	shadows
-74.90794087	7.578166066	0.0283	0.034	0.0435	0.0301	0.059	0.1232	0.1484	0.1403	0.1534	0.2166	0.0855	0.0442	0.646713615	-0.325581395	shadows
-74.91400709	7.616340227	0.0311	0.0348	0.0437	0.0315	0.0585	0.1158	0.1362	0.1358	0.1423	0.2121	0.09	0.0527	0.623430962	-0.346297681	shadows
-74.99913811	7.912051237	0.0389	0.0351	0.0432	0.0304	0.0516	0.1113	0.1355	0.1363	0.1468	0.1562	0.0819	0.0445	0.635272945	-0.309352518	shadows
-74.99968246	7.909970751	0.0386	0.0365	0.0364	0.0297	0.0441	0.071	0.0892	0.0658	0.0858	0.1406	0.0672	0.0416	0.378010471	-0.297297297	shadows
-74.91591253	7.608470833	0.0324	0.037	0.0452	0.0309	0.0509	0.101	0.1212	0.118	0.1249	0.162	0.0907	0.0528	0.584956347	-0.334805004	shadows
-74.95217091	7.660127336	0.0305	0.0366	0.0378	0.0328	0.0508	0.0904	0.1126	0.0998	0.119	0.1734	0.0774	0.0469	0.505279035	-0.34375	shadows
-74.99931957	7.907799808	0.0462	0.036	0.0409	0.0284	0.0558	0.1134	0.1444	0.1368	0.1553	0.1579	0.0904	0.0518	0.656174334	-0.376999238	shadows
-74.94895774	7.986583636	0.017	0.0175	0.019	0.0127	0.0251	0.0595	0.0723	0.068	0.0762	0.0926	0.04	0.0208	0.685254027	-0.355932203	shadows
-74.97708901	7.962886772	0.0187	0.0184	0.022	0.0122	0.0254	0.0651	0.0836	0.083	0.0875	0.0813	0.0439	0.0238	0.743697479	-0.3323217	shadows
-74.9634829	7.913406479	0.021	0.0234	0.0285	0.0205	0.0365	0.0713	0.0892	0.085	0.0948	0.1123	0.0612	0.0337	0.611374408	-0.364548495	shadows
-74.91636587	7.608290007	0.0294	0.0329	0.0366	0.0256	0.0464	0.0949	0.1185	0.1168	0.1267	0.1269	0.0792	0.0463	0.640449438	-0.367875648	shadows
-74.95214172	7.917385391	0.0262	0.0319	0.0424	0.0448	0.0687	0.0981	0.1135	0.1033	0.1163	0.1375	0.1013	0.0549	0.395003376	-0.409881698	shadows
-74.93625377	7.987395973	0.0135	0.0154	0.0195	0.0107	0.0197	0.0537	0.0752	0.0824	0.0805	0.0938	0.0363	0.0202	0.770139635	-0.301075269	shadows
-74.9706508	7.905356467	0.0236	0.0239	0.0242	0.016	0.0315	0.0738	0.0996	0.0841	0.1051	0.108	0.0522	0.0309	0.68031968	-0.366492147	shadows
-74.99895666	7.911418045	0.0388	0.0333	0.0351	0.0264	0.0479	0.1054	0.1346	0.1233	0.1367	0.15	0.0854	0.0494	0.647294589	-0.417427386	shadows
-74.90857523	7.997521793	0.0207	0.0204	0.0259	0.0148	0.0347	0.0895	0.1168	0.0975	0.1233	0.2117	0.061	0.0279	0.736420303	-0.403912543	shadows
-74.95058836	8.009288169	0.0298	0.0317	0.0446	0.0255	0.0641	0.178	0.2223	0.249	0.2296	0.2226	0.1069	0.0449	0.81420765	-0.411221122	shadows
-74.94796686	7.928872783	0.0248	0.0211	0.0249	0.0151	0.0336	0.07	0.0946	0.0872	0.1	0.158	0.0633	0.0374	0.704789834	-0.43537415	shadows
-74.97128578	7.906532439	0.0326	0.0351	0.0435	0.0405	0.0572	0.0861	0.106	0.0988	0.1106	0.1259	0.0826	0.0515	0.418521177	-0.310071372	shadows
-74.99187961	7.935931508	0.0223	0.022	0.0287	0.0149	0.0341	0.0893	0.1203	0.1254	0.1231	0.1465	0.0585	0.0285	0.787598004	-0.341743119	shadows
-74.97412141	7.525438343	0.0414	0.0392	0.0495	0.0325	0.0737	0.1723	0.2077	0.1976	0.225	0.315	0.1202	0.0592	0.717514124	-0.41661756	shadows
-74.95168831	7.915485766	0.0256	0.0296	0.029	0.0334	0.0417	0.0602	0.071	0.0608	0.0728	0.0973	0.0677	0.0446	0.290870488	-0.400206825	shadows
-74.95268619	7.916480895	0.023	0.0251	0.0244	0.0292	0.0355	0.0537	0.0656	0.0553	0.0691	0.0796	0.0627	0.0385	0.30887574	-0.439724455	shadows
-74.93434803	7.988390686	0.0153	0.0212	0.0249	0.0129	0.0361	0.1154	0.1539	0.1676	0.1635	0.1829	0.0729	0.0308	0.857063712	-0.490797546	shadows
-74.9646624	7.912592477	0.0225	0.0224	0.0237	0.0157	0.0291	0.0652	0.0875	0.0839	0.0932	0.1116	0.0503	0.0274	0.684738956	-0.359459459	shadows
-74.97183024	7.904904269	0.0239	0.0235	0.0233	0.0163	0.0279	0.0638	0.0833	0.078	0.0873	0.1197	0.048	0.03	0.654294804	-0.346423562	shadows
-74.95150687	7.915395289	0.0244	0.0242	0.0254	0.0274	0.0402	0.056	0.0677	0.0628	0.0697	0.0985	0.0628	0.0435	0.392461197	-0.424036281	shadows
-74.97074155	7.90499465	0.0241	0.0256	0.0274	0.0176	0.032	0.0633	0.0783	0.0817	0.0815	0.1062	0.0523	0.0337	0.64551863	-0.312421581	shadows
-74.95485561	7.989750266	0.0213	0.0258	0.0314	0.0244	0.0492	0.0921	0.1132	0.111	0.1201	0.133	0.0725	0.0385	0.639586411	-0.395572666	shadows
-74.90857519	7.997702704	0.021	0.019	0.0268	0.0168	0.0468	0.1248	0.175	0.1097	0.1921	0.2519	0.0835	0.0396	0.734387352	-0.514052584	shadows
-74.9355278	7.987576772	0.014	0.013	0.018	0.0147	0.0278	0.0663	0.0892	0.0718	0.092	0.0797	0.0461	0.0255	0.660115607	-0.438377535	shadows
-74.93552678	7.99408957	0.0445	0.034	0.0426	0.0386	0.0784	0.1718	0.2213	0.1427	0.2416	0.2624	0.1328	0.0776	0.574186431	-0.514253136	shadows
-74.9526242	7.660760585	0.0285	0.0328	0.0354	0.0261	0.0429	0.0919	0.1175	0.1138	0.1262	0.1322	0.0718	0.0427	0.62687634	-0.339552239	shadows
-74.95198973	7.658680004	0.0305	0.0356	0.0409	0.0326	0.0498	0.0941	0.1113	0.1055	0.1195	0.2009	0.0776	0.0456	0.527878349	-0.309704641	shadows
-74.98670815	7.929961291	0.0332	0.0339	0.0427	0.0346	0.0623	0.109	0.132	0.1193	0.1391	0.1669	0.0932	0.0514	0.550357375	-0.371596762	shadows
-74.96293861	7.912592328	0.0245	0.0255	0.0276	0.0207	0.0359	0.0725	0.0896	0.088	0.0937	0.0995	0.0581	0.0369	0.619135235	-0.355892649	shadows
-74.91890435	7.608290489	0.0342	0.0412	0.0458	0.0387	0.0613	0.0989	0.1143	0.1103	0.1195	0.1766	0.1062	0.0649	0.480536913	-0.397368421	shadows
-74.93915731	7.988753244	0.0136	0.0172	0.0207	0.0107	0.0266	0.0757	0.1015	0.1176	0.1045	0.1347	0.0477	0.0209	0.833203429	-0.394736842	shadows
-74.94596329	7.986402345	0.0224	0.0166	0.0197	0.0177	0.0307	0.0511	0.0685	0.0401	0.0819	0.1197	0.0448	0.027	0.387543253	-0.389147287	shadows
-74.93490055	7.937283333	0.0182	0.0246	0.021	0.0215	0.0275	0.0353	0.0418	0.046	0.0485	0.0768	0.0575	0.0392	0.362962963	-0.464968153	shadows
-74.93544498	7.937012051	0.0232	0.0221	0.0256	0.0271	0.0359	0.0585	0.0737	0.0597	0.0724	0.1324	0.0579	0.0334	0.375576037	-0.386826347	shadows
-74.9896115	7.929509094	0.0403	0.0409	0.0508	0.0437	0.0682	0.1087	0.1348	0.1304	0.1427	0.186	0.1112	0.0623	0.497989661	-0.372839506	shadows
-74.98670838	7.922815278	0.023	0.0212	0.0249	0.0135	0.0357	0.0999	0.1348	0.1249	0.1415	0.1968	0.0656	0.0304	0.804913295	-0.449723757	shadows
-74.99079086	7.93475556	0.024	0.0207	0.0274	0.0156	0.0343	0.0853	0.104	0.0986	0.108	0.1227	0.0573	0.0295	0.726795096	-0.353010626	shadows
-74.99804943	7.905538405	0.0431	0.0356	0.0436	0.0284	0.0547	0.1102	0.1395	0.134	0.147	0.1523	0.0891	0.0516	0.650246305	-0.342878674	shadows
-74.9778149	7.962977267	0.0196	0.0216	0.022	0.0201	0.0267	0.0575	0.0746	0.0579	0.076	0.0812	0.0491	0.029	0.484615385	-0.381153305	shadows
-74.99913811	7.909789838	0.0422	0.046	0.0475	0.0407	0.0495	0.0605	0.072	0.0695	0.0808	0.1247	0.0633	0.0434	0.261343013	-0.142599278	shadows
-74.96302936	7.912320968	0.0271	0.0332	0.0349	0.0345	0.0443	0.0769	0.0932	0.0892	0.0962	0.109	0.0649	0.04	0.442198868	-0.300601202	shadows
-74.96321067	7.91394919	0.0308	0.0252	0.0322	0.0231	0.048	0.1034	0.1278	0.1059	0.1368	0.1689	0.0808	0.0422	0.641860465	-0.430088496	shadows
-74.93499113	7.938278361	0.0173	0.0182	0.0175	0.02	0.0258	0.0326	0.0398	0.0379	0.0445	0.0552	0.0551	0.0416	0.309153713	-0.517906336	shadows
-74.98752469	7.930594507	0.0273	0.0287	0.0367	0.028	0.053	0.1009	0.1247	0.1295	0.1309	0.1341	0.0835	0.0467	0.644444444	-0.389351082	shadows
-74.97131163	7.523176729	0.0342	0.0364	0.0413	0.0297	0.0538	0.1102	0.1344	0.1358	0.1431	0.2288	0.0843	0.0469	0.641087613	-0.342356688	shadows
-74.99868449	7.910332573	0.0409	0.0362	0.0406	0.0334	0.0525	0.0985	0.1212	0.1091	0.1279	0.1308	0.0932	0.0561	0.53122807	-0.393124066	shadows
-74.91547149	7.998970549	0.02	0.0212	0.025	0.0143	0.0367	0.0959	0.1375	0.1095	0.152	0.1913	0.0638	0.0355	0.768982229	-0.436936937	shadows
-74.9524963	7.989750002	0.0292	0.024	0.0284	0.0232	0.0416	0.0814	0.1008	0.0863	0.1105	0.1236	0.074	0.0456	0.576255708	-0.4453125	shadows
-74.97790564	7.962977272	0.0197	0.0188	0.0205	0.0158	0.0259	0.0643	0.0848	0.0675	0.0851	0.0832	0.0485	0.028	0.620648259	-0.405797101	shadows
-74.96302922	7.913949174	0.0355	0.0284	0.0363	0.0261	0.0528	0.0953	0.1167	0.1017	0.1301	0.1721	0.0827	0.0466	0.591549296	-0.389915966	shadows
-74.95350272	7.916480986	0.0242	0.0209	0.0251	0.0189	0.0354	0.0678	0.084	0.0744	0.0866	0.1012	0.0582	0.0326	0.594855305	-0.397358944	shadows
-74.9525336	7.660127376	0.0281	0.0319	0.0365	0.0315	0.0477	0.0888	0.1069	0.1004	0.1111	0.1561	0.0736	0.0461	0.522365428	-0.336966394	shadows
-74.97844782	8.005581889	0.0248	0.0385	0.04	0.0276	0.0388	0.064	0.0719	0.1072	0.0689	0.0756	0.0514	0.028	0.590504451	-0.124726477	shadows
-74.99886594	7.909428014	0.0399	0.0375	0.0417	0.0382	0.0519	0.0876	0.1092	0.099	0.1116	0.1224	0.0844	0.0509	0.443148688	-0.338620143	shadows
-74.9702879	7.905356442	0.0242	0.0248	0.0277	0.0174	0.0336	0.0771	0.0998	0.0941	0.1016	0.1113	0.0534	0.0316	0.687892377	-0.316892725	shadows
-74.94741503	7.987397543	0.016	0.016	0.0205	0.0126	0.0299	0.0891	0.1196	0.0921	0.1207	0.1221	0.0576	0.0319	0.759312321	-0.47503201	shadows
-74.97131165	7.522814899	0.0351	0.0411	0.0497	0.0377	0.0566	0.1116	0.134	0.1324	0.143	0.229	0.0924	0.0535	0.556731335	-0.300492611	shadows
-74.96321074	7.913135087	0.0207	0.0221	0.0245	0.0179	0.0336	0.0692	0.0881	0.0808	0.0924	0.0968	0.0565	0.0337	0.637284701	-0.395061728	shadows
-74.96194052	7.913858621	0.0526	0.0248	0.0308	0.0234	0.0437	0.0933	0.121	0.1016	0.1289	0.1621	0.0703	0.0444	0.6256	-0.390702275	shadows
-74.95186969	7.916118978	0.0275	0.0301	0.0322	0.0391	0.0478	0.0602	0.0728	0.0682	0.0737	0.0858	0.0724	0.0494	0.271202237	-0.384321224	shadows
-74.97183023	7.904994725	0.0234	0.0208	0.0223	0.0152	0.0277	0.0641	0.084	0.0773	0.0883	0.1122	0.0476	0.0293	0.671351351	-0.361945637	shadows
-74.97155809	7.904542427	0.0262	0.0282	0.0291	0.025	0.0354	0.0599	0.0703	0.0814	0.0772	0.131	0.0593	0.0395	0.530075188	-0.341628959	shadows
-74.90342671	7.895305738	0.02	0.0239	0.0258	0.02	0.0318	0.0637	0.0788	0.0682	0.0822	0.0952	0.0501	0.0274	0.546485261	-0.320158103	shadows
-74.90397017	7.899105009	0.0125	0.0226	0.025	0.0221	0.0322	0.0572	0.0734	0.0669	0.0763	0.0832	0.0579	0.0329	0.503370787	-0.396863691	shadows
-74.95186955	7.917294904	0.0282	0.0283	0.0364	0.0328	0.055	0.096	0.1184	0.0964	0.1241	0.146	0.0871	0.0459	0.492260062	-0.410526316	shadows
-74.99142598	7.934665118	0.0213	0.0241	0.0332	0.0168	0.0422	0.0945	0.116	0.1241	0.1177	0.1245	0.0613	0.0319	0.761533002	-0.297354497	shadows
-74.97726809	8.00630547	0.0221	0.0228	0.0238	0.0191	0.0293	0.051	0.0647	0.054	0.0639	0.0627	0.0429	0.0267	0.477428181	-0.286356822	shadows
-74.98698054	7.923448477	0.0205	0.0205	0.0238	0.0135	0.0297	0.0818	0.1136	0.1079	0.1213	0.1537	0.0531	0.0267	0.777594728	-0.381014304	shadows
-74.9500441	8.007478994	0.0233	0.0338	0.0436	0.0383	0.0673	0.1288	0.1545	0.1376	0.1602	0.1546	0.109	0.0544	0.564525298	-0.428571429	shadows
-74.95353103	7.6596752	0.0273	0.028	0.0328	0.0241	0.0432	0.0906	0.1153	0.1094	0.1204	0.1716	0.0679	0.0403	0.638951311	-0.348560079	shadows
-74.91572985	7.615435995	0.0264	0.0336	0.0391	0.0278	0.0507	0.1033	0.1242	0.1237	0.1285	0.1739	0.0798	0.0453	0.6330033	-0.342304458	shadows
-74.97654474	7.960353982	0.023	0.0235	0.0355	0.0176	0.048	0.1328	0.1635	0.1428	0.1674	0.18	0.0759	0.0331	0.780548628	-0.362657092	shadows
-74.91582204	7.607566245	0.0351	0.0381	0.0416	0.0363	0.0524	0.0976	0.1186	0.1035	0.1258	0.1986	0.0878	0.0519	0.480686695	-0.357032457	shadows
-74.90415157	7.899285963	0.0133	0.0254	0.0262	0.0198	0.0329	0.0623	0.0797	0.0768	0.0833	0.0875	0.0564	0.0316	0.590062112	-0.365617433	shadows
-74.99922884	7.909789839	0.0432	0.0393	0.0413	0.0336	0.0476	0.0604	0.0747	0.0874	0.0769	0.1256	0.0641	0.0427	0.444628099	-0.216318786	shadows
-74.99886594	7.907437983	0.0436	0.0392	0.0455	0.0373	0.0569	0.1054	0.1317	0.1254	0.1439	0.1501	0.1008	0.0571	0.5414874	-0.377990431	shadows
-74.98670813	7.930594481	0.0338	0.0305	0.0388	0.0372	0.0602	0.093	0.1133	0.1004	0.1167	0.1639	0.0923	0.055	0.459302326	-0.408085431	shadows
-74.94759667	7.986131188	0.0147	0.0154	0.0179	0.0131	0.0214	0.0368	0.0489	0.0545	0.0572	0.0542	0.0332	0.0191	0.612426036	-0.299412916	shadows
-74.93553558	7.937826167	0.0171	0.0212	0.0245	0.0183	0.0287	0.057	0.0727	0.063	0.0762	0.0774	0.0502	0.0294	0.549815498	-0.344042838	shadows
-74.99922883	7.911960781	0.0388	0.0333	0.0367	0.0265	0.0495	0.1064	0.1316	0.1263	0.1409	0.1473	0.0792	0.0437	0.653141361	-0.366695427	shadows
-74.93462824	7.938006937	0.0157	0.0181	0.0155	0.0193	0.0237	0.03	0.038	0.0354	0.04	0.0551	0.0528	0.0391	0.294332724	-0.546120059	shadows
-74.95168822	7.916299869	0.0297	0.0262	0.0277	0.0317	0.0445	0.0555	0.0677	0.0632	0.0705	0.0931	0.071	0.0494	0.331928346	-0.438703141	shadows
-74.90496894	7.895487003	0.0174	0.0185	0.0227	0.0122	0.03	0.0811	0.1049	0.107	0.1114	0.1364	0.0479	0.0245	0.795302013	-0.35694051	shadows
-74.97221807	7.522905415	0.0347	0.0414	0.0466	0.0337	0.0586	0.1179	0.1425	0.1362	0.1513	0.241	0.0928	0.0528	0.603296057	-0.331420373	shadows
-74.97908305	8.005491467	0.0246	0.0253	0.0263	0.02	0.0292	0.0501	0.0615	0.0552	0.0614	0.0756	0.0392	0.0247	0.468085106	-0.196946565	shadows
-74.97119507	7.906441976	0.0316	0.0308	0.0386	0.0374	0.0532	0.0834	0.1055	0.0853	0.1073	0.1234	0.0818	0.0522	0.390383048	-0.358803987	shadows
-74.91591255	7.608380376	0.0322	0.0351	0.0428	0.0316	0.0513	0.0962	0.1185	0.1075	0.1248	0.1626	0.0892	0.0519	0.545650611	-0.351515152	shadows
-74.94705231	7.985407474	0.0141	0.0151	0.0201	0.0112	0.0239	0.0478	0.062	0.0601	0.0656	0.0533	0.04	0.0221	0.685834502	-0.331114809	shadows
-74.9711951	7.905899241	0.0246	0.0221	0.023	0.0154	0.0306	0.0715	0.0938	0.0876	0.0971	0.1098	0.0518	0.0313	0.700970874	-0.385026738	shadows
-74.9357083	7.993908687	0.0452	0.033	0.0463	0.0297	0.06	0.1284	0.1562	0.1723	0.162	0.2297	0.0939	0.0466	0.705940594	-0.339514979	shadows
-74.97182301	8.010737453	0.101	0.0444	0.0427	0.0327	0.0535	0.0829	0.102	0.0916	0.1136	0.2234	0.0781	0.0645	0.47385358	-0.293046358	shadows
-74.94002767	7.612093124	0.0336	0.0371	0.0445	0.0293	0.0643	0.1566	0.1891	0.179	0.1997	0.2529	0.104	0.0524	0.718674988	-0.400673401	shadows
-74.95196041	7.916209444	0.0269	0.0297	0.0311	0.0361	0.0477	0.0588	0.0703	0.0627	0.0697	0.0837	0.0726	0.0493	0.269230769	-0.400192864	shadows
-74.94769699	7.910510211	0.0225	0.0206	0.0255	0.0153	0.0321	0.0846	0.1124	0.0977	0.1224	0.1437	0.0539	0.0275	0.72920354	-0.35768262	shadows
-74.96203135	7.912682702	0.0263	0.0235	0.0324	0.0198	0.0403	0.0901	0.1089	0.118	0.1142	0.1489	0.0627	0.0347	0.712626996	-0.318611987	shadows
-74.95476496	7.988845701	0.0189	0.0267	0.0359	0.0278	0.0473	0.1046	0.1284	0.116	0.1303	0.135	0.0703	0.0332	0.613351878	-0.323917137	shadows
-74.91636583	7.608470921	0.0298	0.0309	0.038	0.0275	0.0468	0.094	0.1164	0.1088	0.1231	0.1282	0.0823	0.0472	0.596478357	-0.368246052	shadows
-74.94768754	7.985136188	0.0169	0.0179	0.0194	0.0138	0.0248	0.0514	0.0665	0.0575	0.0702	0.0879	0.0406	0.0226	0.612903226	-0.353333333	shadows
-74.91591128	7.614893287	0.027	0.0317	0.0365	0.0245	0.0476	0.108	0.1348	0.1297	0.1403	0.1659	0.0748	0.0417	0.682230869	-0.344115004	shadows
-74.90279141	7.896391061	0.0152	0.0309	0.0356	0.0332	0.0361	0.058	0.0722	0.0725	0.0799	0.0992	0.0521	0.0298	0.371807001	-0.188141391	shadows
-74.97246524	7.905899326	0.0255	0.0249	0.0304	0.0186	0.0483	0.1331	0.1913	0.1217	0.2176	0.2007	0.0815	0.0446	0.734853885	-0.45665773	shadows
-74.99922883	7.912503516	0.0416	0.0303	0.0378	0.0238	0.0481	0.1134	0.1517	0.14	0.1576	0.1703	0.0801	0.0429	0.709401709	-0.358778626	shadows
-74.93517274	7.937283376	0.0194	0.0233	0.021	0.0229	0.0281	0.0382	0.0498	0.0453	0.0514	0.08	0.0563	0.0401	0.328445748	-0.456662354	shadows
-74.93499127	7.937373803	0.0185	0.0209	0.0198	0.0202	0.0267	0.0346	0.0447	0.0428	0.0485	0.0725	0.0566	0.0397	0.358730159	-0.481675393	shadows
-74.95289644	7.658680104	0.0291	0.0317	0.0371	0.0281	0.045	0.0952	0.121	0.1144	0.1272	0.1877	0.0689	0.0423	0.605614035	-0.3	shadows
-74.91400715	7.616068856	0.031	0.034	0.0425	0.0301	0.0574	0.1283	0.1581	0.1445	0.1671	0.2215	0.0885	0.0496	0.655211913	-0.351145038	shadows
-74.9344387	7.988842978	0.02	0.018	0.0198	0.0108	0.0252	0.0721	0.0967	0.1096	0.1016	0.1293	0.0468	0.0213	0.820598007	-0.405405405	shadows
-74.98643617	7.923719828	0.0179	0.0182	0.0209	0.011	0.025	0.0717	0.0994	0.1016	0.1004	0.1107	0.0492	0.0261	0.804618117	-0.403708987	shadows
-74.93462809	7.93900195	0.0128	0.0143	0.0126	0.0138	0.0217	0.0359	0.0486	0.043	0.0522	0.0678	0.0433	0.03	0.514084507	-0.549194991	shadows
-74.98534745	7.9230866	0.0256	0.0272	0.0363	0.0195	0.0414	0.0877	0.1084	0.1194	0.1122	0.1408	0.0644	0.0336	0.719222462	-0.279046673	shadows
-74.95226167	7.65940369	0.0287	0.0332	0.0344	0.027	0.0478	0.0877	0.1079	0.0985	0.113	0.1849	0.0755	0.0465	0.569721116	-0.373976342	shadows
-74.93544451	7.939997091	0.0188	0.0162	0.0183	0.0123	0.034	0.0977	0.1301	0.1031	0.1418	0.1689	0.0673	0.0351	0.786828423	-0.572429907	shadows
-74.99950101	7.909880295	0.0414	0.0422	0.0427	0.0353	0.0456	0.0717	0.0883	0.0764	0.0911	0.133	0.0663	0.0425	0.367949866	-0.216513761	shadows
-74.93957472	7.609560261	0.028	0.0303	0.0346	0.0242	0.0476	0.1091	0.1375	0.1216	0.1472	0.221	0.0777	0.0431	0.668038409	-0.383793411	shadows
-74.99977319	7.911056222	0.0336	0.0323	0.0365	0.0258	0.0457	0.0965	0.1261	0.1196	0.133	0.1344	0.0747	0.0426	0.645116919	-0.34352518	shadows
-74.98625464	7.925800307	0.0284	0.0271	0.0363	0.0289	0.0555	0.121	0.1542	0.1205	0.1726	0.1999	0.0948	0.052	0.613119143	-0.446224256	shadows
-74.93562636	7.937554814	0.0183	0.0216	0.025	0.0188	0.0301	0.0672	0.0854	0.073	0.0897	0.0891	0.0535	0.028	0.590413943	-0.363057325	shadows
-74.99777726	7.905538404	0.0433	0.0389	0.0427	0.0329	0.0555	0.1104	0.1373	0.1245	0.1466	0.1504	0.0922	0.0536	0.581956798	-0.366938473	shadows
-74.93435591	7.938911451	0.0129	0.0117	0.0114	0.0082	0.0166	0.0443	0.0607	0.0584	0.0677	0.0778	0.0382	0.0238	0.753753754	-0.540322581	shadows
-74.99060939	7.935388747	0.0268	0.0321	0.0359	0.022	0.0442	0.104	0.1286	0.1229	0.1361	0.1381	0.0746	0.041	0.696342305	-0.350226244	shadows
-74.93444668	7.938640098	0.0131	0.0128	0.0128	0.0136	0.02	0.032	0.0454	0.0363	0.0481	0.0651	0.0431	0.0314	0.45490982	-0.542039356	shadows
-74.96402733	7.912501967	0.0227	0.0268	0.0287	0.0221	0.0354	0.0716	0.0845	0.0843	0.0891	0.0997	0.0586	0.0328	0.584586466	-0.342497136	shadows
-74.97844782	8.005672345	0.0241	0.0298	0.0314	0.0222	0.0343	0.058	0.0654	0.0816	0.0631	0.0723	0.045	0.0256	0.572254335	-0.178010471	shadows
-74.99142598	7.934574662	0.0216	0.0249	0.0386	0.02	0.0459	0.1009	0.1206	0.126	0.1217	0.1256	0.0661	0.0332	0.726027397	-0.262655205	shadows
-74.99777725	7.907166611	0.0827	0.0364	0.0457	0.0382	0.064	0.114	0.1432	0.1222	0.1544	0.1805	0.1129	0.073	0.523690773	-0.42370744	shadows
-74.97754266	7.963610442	0.0161	0.0172	0.0173	0.011	0.0221	0.0619	0.0808	0.0737	0.0846	0.0833	0.0414	0.022	0.74025974	-0.410562181	shadows
-74.90270064	7.896571952	0.0143	0.017	0.0181	0.0123	0.0244	0.0506	0.0701	0.0634	0.0742	0.1006	0.0429	0.0241	0.675033025	-0.406557377	shadows
-74.99886594	7.907347527	0.0434	0.0426	0.05	0.0388	0.058	0.1092	0.1348	0.1318	0.1451	0.1511	0.1029	0.0584	0.545134818	-0.345977763	shadows
-74.98924858	7.929509085	0.0361	0.0371	0.0439	0.043	0.0624	0.1018	0.1193	0.113	0.1267	0.1484	0.0951	0.0543	0.448717949	-0.368345324	shadows
-74.93490038	7.938368802	0.0167	0.0207	0.0189	0.0215	0.0265	0.0319	0.0407	0.0378	0.0437	0.0555	0.0557	0.0439	0.274873524	-0.493297587	shadows
-74.9983216	7.907618893	0.0809	0.037	0.0434	0.0327	0.0519	0.1029	0.1333	0.1186	0.1429	0.1677	0.0924	0.0578	0.5677462	-0.360824742	shadows
-74.97176489	7.522453098	0.0374	0.0411	0.0498	0.037	0.0608	0.1169	0.1386	0.1372	0.1474	0.2331	0.0965	0.0562	0.575200918	-0.319207109	shadows
-74.90803151	7.578256542	0.0281	0.0336	0.0466	0.0304	0.0574	0.1252	0.1521	0.1559	0.1596	0.2148	0.0851	0.0445	0.673644659	-0.292331055	shadows
-74.98797832	7.931408623	0.0461	0.0263	0.035	0.0207	0.0522	0.1368	0.1733	0.1692	0.1872	0.2336	0.0928	0.0481	0.781990521	-0.452269171	shadows
-74.99931956	7.909428015	0.0441	0.0376	0.0412	0.0289	0.0495	0.0979	0.1243	0.1137	0.1295	0.1286	0.0824	0.0492	0.594670407	-0.333333333	shadows
-74.97690749	7.963791319	0.0219	0.0166	0.0198	0.0117	0.0244	0.0686	0.0926	0.087	0.0987	0.109	0.0436	0.0243	0.762917933	-0.375394322	shadows
-74.97185551	7.522724477	0.0357	0.0426	0.0469	0.0375	0.0597	0.1088	0.1314	0.1265	0.1365	0.2309	0.0956	0.0558	0.542682927	-0.341754386	shadows
-74.97844781	8.005943711	0.0219	0.0232	0.0265	0.0192	0.0294	0.0457	0.0573	0.0538	0.0586	0.0624	0.0387	0.025	0.473972603	-0.187116564	shadows
-74.93534625	7.988029021	0.012	0.0144	0.0151	0.0096	0.0188	0.0508	0.0705	0.0667	0.0722	0.0665	0.0355	0.0193	0.74836173	-0.403162055	shadows
-74.99931957	7.908523456	0.0482	0.0411	0.0473	0.0362	0.0587	0.1136	0.1386	0.1358	0.1466	0.1567	0.0978	0.0555	0.579069767	-0.348035837	shadows
-74.95567226	7.990021721	0.02	0.0233	0.0378	0.0183	0.0464	0.1394	0.174	0.2558	0.1746	0.1742	0.0823	0.0323	0.86647209	-0.370524563	shadows
-74.95189904	7.658860908	0.0305	0.033	0.0377	0.0308	0.0498	0.0939	0.1152	0.1078	0.1207	0.2018	0.0763	0.0462	0.555555556	-0.338596491	shadows
-74.99823087	7.907347525	0.0653	0.0352	0.0416	0.0344	0.0535	0.1018	0.1278	0.1188	0.1399	0.1502	0.0931	0.054	0.550913838	-0.382331106	shadows
-74.97746849	7.654430611	0.0318	0.0302	0.0318	0.0245	0.0451	0.1096	0.1396	0.1147	0.1506	0.1658	0.0731	0.0382	0.647988506	-0.393708294	shadows
-74.95132535	7.915938003	0.0294	0.0267	0.0283	0.0323	0.0409	0.0534	0.0652	0.0566	0.0701	0.1027	0.0712	0.0492	0.273340832	-0.431155779	shadows
-74.99950101	7.909428015	0.0414	0.0361	0.0386	0.0253	0.0495	0.1009	0.1282	0.1187	0.1364	0.1333	0.0797	0.0458	0.648611111	-0.347421809	shadows
-74.93579904	7.993908701	0.0424	0.0321	0.0408	0.0333	0.0592	0.1242	0.1453	0.1338	0.1501	0.2259	0.0911	0.0456	0.601436266	-0.381349507	shadows
-74.99931956	7.910513486	0.0426	0.0344	0.0386	0.0305	0.0501	0.1063	0.1334	0.1279	0.1381	0.1299	0.0869	0.0514	0.61489899	-0.384860558	shadows
-74.99913812	7.908523455	0.049	0.0404	0.0433	0.0354	0.0539	0.1115	0.1401	0.1253	0.1437	0.1528	0.0935	0.0533	0.559427505	-0.366959064	shadows
-74.92918979	7.906346513	0.0286	0.0304	0.0397	0.0307	0.0548	0.1008	0.1219	0.1248	0.1321	0.1422	0.081	0.0375	0.605144695	-0.342170671	shadows
-74.9778149	7.963067723	0.0187	0.0189	0.0223	0.0151	0.0258	0.0622	0.0821	0.0747	0.0824	0.083	0.0482	0.0271	0.663697105	-0.367375887	shadows
-74.97881071	8.007391018	0.028	0.0238	0.0248	0.0222	0.0327	0.0522	0.0641	0.0488	0.0648	0.0775	0.0475	0.0294	0.374647887	-0.313969571	shadows
-74.95049785	8.007298138	0.0213	0.0256	0.0332	0.026	0.0437	0.0895	0.1085	0.1	0.1085	0.1467	0.0722	0.0389	0.587301587	-0.370018975	shadows
-74.97953878	7.965329204	0.0253	0.0212	0.0345	0.0171	0.0542	0.1804	0.2498	0.229	0.2813	0.3167	0.1144	0.0508	0.861032101	-0.536601746	shadows
-74.97853853	8.006305538	0.0203	0.0187	0.0222	0.0157	0.0267	0.0496	0.0617	0.0574	0.0639	0.0582	0.0375	0.0221	0.570451436	-0.256281407	shadows
-74.95150686	7.915485745	0.0251	0.0272	0.0271	0.0322	0.0415	0.0568	0.0676	0.0572	0.0694	0.0976	0.0644	0.0443	0.279642058	-0.407650273	shadows
-74.98897638	7.930142268	0.0349	0.0363	0.0455	0.0412	0.0738	0.1154	0.1354	0.1254	0.1465	0.1707	0.1189	0.0645	0.505402161	-0.446472019	shadows
-74.95095157	8.007388647	0.0222	0.0242	0.031	0.0236	0.0477	0.0949	0.1219	0.0959	0.1309	0.1613	0.0802	0.0425	0.605020921	-0.442446043	shadows
-74.94732425	7.987668898	0.0206	0.0203	0.0318	0.0176	0.0496	0.1401	0.1793	0.1388	0.1811	0.1591	0.0851	0.0429	0.774936061	-0.455945252	shadows
-74.93834048	7.989748134	0.0105	0.0129	0.0134	0.0086	0.0201	0.057	0.0798	0.0731	0.0887	0.0885	0.0425	0.0213	0.789473684	-0.520572451	shadows
-74.99859376	7.910242117	0.0432	0.0365	0.0432	0.0378	0.0526	0.0962	0.1179	0.1035	0.1211	0.1333	0.0899	0.0552	0.464968153	-0.350864012	shadows
-74.90821226	7.997521713	0.0202	0.0192	0.0244	0.0139	0.0309	0.0809	0.1012	0.0976	0.105	0.2214	0.0551	0.0217	0.750672646	-0.386163522	shadows
-74.95159764	7.915033476	0.0268	0.0246	0.0313	0.0182	0.0406	0.0781	0.092	0.1253	0.0905	0.1796	0.0687	0.0392	0.746341463	-0.374	shadows
-74.96302934	7.912592336	0.0242	0.0234	0.0252	0.0187	0.0353	0.0705	0.0877	0.087	0.0928	0.0987	0.0576	0.0365	0.646168401	-0.391304348	shadows
-74.93425717	7.989114316	0.0353	0.0173	0.0222	0.0131	0.0273	0.0781	0.1041	0.1143	0.1078	0.1436	0.0476	0.0226	0.794348509	-0.363896848	shadows
-74.97237452	7.90589932	0.0249	0.0238	0.025	0.0165	0.0407	0.1079	0.1531	0.1002	0.1689	0.1804	0.0682	0.038	0.71722365	-0.463519313	shadows
-74.91863234	7.608471352	0.0346	0.0388	0.0445	0.0368	0.0601	0.1027	0.124	0.1134	0.1275	0.1773	0.1092	0.0644	0.509986684	-0.420949902	shadows
-74.91718191	7.607747421	0.03	0.0287	0.0333	0.0243	0.0421	0.0919	0.1137	0.1082	0.1202	0.1228	0.0733	0.0404	0.633207547	-0.375234522	shadows
-74.97194615	7.52281494	0.0351	0.0405	0.0455	0.0349	0.057	0.1089	0.1308	0.1246	0.1375	0.2311	0.093	0.0545	0.562382445	-0.342960289	shadows
-74.93915708	7.990290988	0.018	0.0235	0.035	0.0248	0.0494	0.1389	0.1793	0.1593	0.2061	0.2287	0.0905	0.0424	0.730581206	-0.442231076	shadows
-74.99913811	7.909880294	0.0422	0.0467	0.0466	0.0408	0.0495	0.0678	0.0822	0.0598	0.0849	0.1244	0.0692	0.0448	0.188866799	-0.195164076	shadows
-74.99931956	7.908613912	0.0479	0.041	0.0466	0.037	0.057	0.1115	0.1381	0.1294	0.1452	0.1535	0.0957	0.0542	0.555288462	-0.345045678	shadows
-74.95458339	7.989659781	0.0199	0.0233	0.0305	0.024	0.0438	0.0877	0.1074	0.0865	0.113	0.1119	0.0699	0.0364	0.56561086	-0.392430279	shadows
-74.98952078	7.929147268	0.0435	0.0426	0.0527	0.0479	0.0789	0.1311	0.1559	0.1469	0.1669	0.2023	0.1363	0.0722	0.508213552	-0.442328042	shadows
-74.9395743	7.612545347	0.0339	0.0364	0.0422	0.0286	0.0581	0.1372	0.1745	0.166	0.187	0.2595	0.1014	0.0514	0.70606372	-0.412256267	shadows
-74.99922884	7.908704367	0.048	0.0399	0.0451	0.035	0.0547	0.1113	0.1391	0.1284	0.1449	0.1492	0.0931	0.0532	0.571603427	-0.347322721	shadows
-74.96947137	7.905537295	0.0283	0.0292	0.034	0.0272	0.0409	0.0733	0.0905	0.088	0.0946	0.1283	0.0651	0.0398	0.527777778	-0.31382442	shadows
-74.952171	7.65940368	0.0287	0.0316	0.0349	0.025	0.0447	0.0885	0.1078	0.1042	0.1143	0.1853	0.0737	0.045	0.613003096	-0.357274401	shadows
-74.9983216	7.907528437	0.0744	0.0372	0.0417	0.0306	0.052	0.1034	0.1324	0.127	0.1436	0.1618	0.092	0.0553	0.611675127	-0.376215408	shadows
-74.90487816	7.89575835	0.0151	0.0183	0.023	0.0111	0.029	0.0779	0.1034	0.0941	0.1061	0.1158	0.0469	0.0228	0.788973384	-0.341917024	shadows
-74.95344036	7.65967519	0.0273	0.0286	0.0335	0.0252	0.0437	0.0905	0.1184	0.104	0.124	0.1739	0.0685	0.041	0.609907121	-0.343137255	shadows
-74.98707122	7.925167142	0.025	0.0262	0.0312	0.0216	0.0464	0.1057	0.1308	0.1135	0.1413	0.1696	0.0813	0.0432	0.680236862	-0.445333333	shadows
-74.96965279	7.905989588	0.0333	0.0295	0.0337	0.0254	0.0412	0.0704	0.0868	0.0777	0.0905	0.1295	0.0645	0.04	0.507274491	-0.313645621	shadows
-74.93444662	7.939001921	0.0128	0.0106	0.0112	0.0076	0.0186	0.0436	0.0618	0.0568	0.0656	0.0745	0.0401	0.025	0.763975155	-0.563352827	shadows
-74.974484	7.525166992	0.0449	0.0429	0.0534	0.0437	0.0734	0.1506	0.1884	0.1692	0.2013	0.3199	0.1206	0.0686	0.589478628	-0.386206897	shadows
-74.99968246	7.909880295	0.0386	0.0372	0.0378	0.0289	0.0464	0.0758	0.0964	0.0919	0.0987	0.1402	0.0703	0.0428	0.521523179	-0.300647549	shadows
-74.97110446	7.904723307	0.0249	0.0273	0.0257	0.0249	0.0335	0.0448	0.0568	0.0538	0.0613	0.1091	0.0554	0.038	0.367217281	-0.36621455	shadows
-74.99886594	7.908342543	0.0511	0.0357	0.0433	0.0338	0.0534	0.099	0.1235	0.111	0.1308	0.1486	0.0921	0.0539	0.533149171	-0.360413589	shadows
-74.99777726	7.90562886	0.0427	0.0379	0.0433	0.0351	0.0547	0.1096	0.1349	0.12	0.1449	0.1485	0.0913	0.053	0.547388781	-0.356612184	shadows
-74.93490057	7.937192878	0.0184	0.0242	0.0226	0.0221	0.0276	0.041	0.0514	0.0496	0.0564	0.0812	0.0585	0.0379	0.383542538	-0.442663379	shadows
-74.9470619	7.910600587	0.0209	0.0199	0.0262	0.0146	0.0355	0.088	0.1122	0.1058	0.112	0.1343	0.0557	0.027	0.757475083	-0.36019536	shadows
-74.90442444	7.896210526	0.0119	0.0177	0.0163	0.0105	0.0226	0.0561	0.0785	0.0713	0.078	0.0862	0.0409	0.0205	0.743276284	-0.43006993	shadows
-74.98970223	7.929599552	0.0423	0.0394	0.0505	0.0444	0.072	0.1201	0.1488	0.1287	0.1657	0.2221	0.1293	0.076	0.487001733	-0.438264739	shadows
-74.93897576	7.989205495	0.0125	0.0117	0.0165	0.0086	0.0244	0.075	0.1047	0.0885	0.1155	0.136	0.05	0.0243	0.822863028	-0.503759398	shadows
-74.97203682	7.522362658	0.0379	0.0435	0.0515	0.0382	0.0651	0.1283	0.154	0.1488	0.1583	0.2359	0.1011	0.0565	0.59144385	-0.325032765	shadows
-74.93643518	7.987848279	0.0111	0.0153	0.0143	0.0075	0.017	0.0488	0.0668	0.0674	0.0695	0.0616	0.0332	0.0184	0.799732977	-0.397894737	shadows
-74.97439334	7.525438359	0.0439	0.0477	0.0571	0.0455	0.0824	0.1598	0.1909	0.1826	0.2035	0.3184	0.1331	0.0716	0.60105217	-0.39957939	shadows
-74.9712859	7.904813776	0.0246	0.0262	0.0235	0.0237	0.0324	0.0481	0.0599	0.0471	0.0642	0.1093	0.0532	0.0362	0.330508475	-0.387222947	shadows
-74.97699825	7.963339045	0.0178	0.0155	0.0191	0.0126	0.0224	0.0593	0.0827	0.0755	0.0862	0.0902	0.0417	0.0225	0.713961407	-0.371710526	shadows
-74.93534611	7.988933577	0.0287	0.0142	0.0159	0.0097	0.0204	0.0561	0.0825	0.0681	0.0893	0.1169	0.0438	0.0268	0.750642674	-0.467336683	shadows
-74.95259547	7.916390429	0.0238	0.0241	0.0261	0.0255	0.0358	0.0522	0.0644	0.0587	0.067	0.0798	0.0628	0.0394	0.394299287	-0.412823397	shadows
-74.95177893	7.916390335	0.0291	0.0276	0.0291	0.0332	0.0489	0.0565	0.0674	0.0604	0.0708	0.091	0.0735	0.0504	0.290598291	-0.432748538	shadows
-74.9526862	7.916390439	0.0234	0.0226	0.0254	0.0265	0.0352	0.0519	0.0631	0.0546	0.0659	0.0796	0.0623	0.0392	0.34648582	-0.420752566	shadows
-74.97853853	8.006395994	0.0201	0.0209	0.0224	0.0154	0.0266	0.0515	0.0627	0.0603	0.0655	0.0581	0.0376	0.0222	0.593130779	-0.253333333	shadows
-74.94949959	8.007750294	0.0313	0.0283	0.0344	0.0304	0.0479	0.0952	0.1193	0.098	0.1292	0.1574	0.0772	0.0459	0.526479751	-0.383512545	shadows
-74.97128578	7.906622895	0.034	0.041	0.0519	0.0421	0.0504	0.0815	0.0985	0.1108	0.1021	0.1289	0.0775	0.0479	0.449313277	-0.197836167	shadows
-74.93444658	7.939273289	0.0127	0.0089	0.012	0.0078	0.0191	0.0529	0.0777	0.0724	0.0812	0.0826	0.0383	0.0225	0.805486284	-0.522862823	shadows
-74.99850304	7.910061204	0.0456	0.0343	0.0389	0.0331	0.0531	0.0934	0.1157	0.1109	0.1209	0.1333	0.0854	0.0514	0.540277778	-0.374094932	shadows
-74.98924844	7.935207802	0.0585	0.029	0.0379	0.0284	0.0578	0.1338	0.177	0.1392	0.1955	0.2357	0.1093	0.0753	0.661097852	-0.485054348	shadows
-74.93526322	7.938911594	0.0166	0.02	0.0197	0.0186	0.0286	0.0451	0.0557	0.0466	0.0576	0.0638	0.0556	0.0422	0.429447853	-0.476759628	shadows
-74.95180837	7.658860898	0.0312	0.0342	0.0411	0.0327	0.0513	0.0933	0.1143	0.1094	0.1195	0.2078	0.078	0.0478	0.539760732	-0.309823678	shadows
-74.98734323	7.930775413	0.0351	0.0282	0.037	0.0281	0.0528	0.1028	0.1232	0.1309	0.1242	0.1736	0.083	0.0492	0.646540881	-0.383333333	shadows
-74.95186979	7.915304875	0.0266	0.0301	0.0295	0.0334	0.0412	0.0605	0.072	0.0603	0.0761	0.1197	0.0665	0.0431	0.287086446	-0.385416667	shadows
-74.93480983	7.937192863	0.0179	0.0253	0.0219	0.0227	0.0271	0.0398	0.0508	0.0498	0.0555	0.0814	0.0557	0.0373	0.373793103	-0.43556701	shadows
-74.99786798	7.907257068	0.0844	0.0379	0.0453	0.0394	0.0636	0.1123	0.1398	0.1208	0.1469	0.1787	0.1122	0.0715	0.508114856	-0.424761905	shadows
-74.93535418	7.937464316	0.0189	0.0218	0.0218	0.0248	0.0323	0.0518	0.0617	0.0493	0.0663	0.0801	0.0561	0.0344	0.330634278	-0.440308087	shadows
-74.94741538	7.98459342	0.0224	0.0205	0.0244	0.0145	0.0272	0.0589	0.0735	0.0717	0.0744	0.1592	0.0473	0.025	0.663573086	-0.319386332	shadows
-74.97745191	7.963700893	0.0161	0.0164	0.017	0.0109	0.0215	0.0562	0.0775	0.07	0.0817	0.0854	0.0406	0.0222	0.73053152	-0.409722222	shadows
-74.95262426	7.660217843	0.0277	0.0307	0.0361	0.0303	0.0452	0.0923	0.1172	0.1039	0.1222	0.1517	0.0719	0.0439	0.548435171	-0.331481481	shadows
-74.93444674	7.938278275	0.0142	0.0147	0.0129	0.0112	0.0203	0.031	0.0411	0.0406	0.046	0.06	0.0452	0.033	0.567567568	-0.555938038	shadows
-74.9794481	7.964153275	0.0216	0.0192	0.0194	0.0109	0.0223	0.0687	0.0964	0.0851	0.1025	0.1501	0.0455	0.0252	0.772916667	-0.402157165	shadows
-74.99904739	7.910875309	0.0395	0.0354	0.0403	0.0321	0.0474	0.0905	0.1147	0.1079	0.1249	0.133	0.0842	0.0499	0.541428571	-0.352610442	shadows
-74.95467411	7.989840702	0.0211	0.025	0.0345	0.0264	0.0498	0.1021	0.1209	0.1089	0.126	0.1291	0.0761	0.0402	0.609756098	-0.376130199	shadows
-74.9345373	7.939363759	0.0114	0.0105	0.0118	0.0083	0.0184	0.0505	0.0728	0.0776	0.0794	0.0799	0.0392	0.0223	0.806752037	-0.537254902	shadows
-74.98779689	7.930232691	0.0293	0.0303	0.0384	0.0318	0.0486	0.0901	0.1084	0.1035	0.1172	0.1353	0.0763	0.0456	0.529933481	-0.330427201	shadows
-74.97890365	7.964695982	0.0176	0.0157	0.0175	0.0094	0.0229	0.0686	0.0945	0.0867	0.0994	0.1203	0.0451	0.0243	0.804370447	-0.440894569	shadows
-74.99841233	7.905719319	0.0441	0.035	0.041	0.0303	0.0579	0.1143	0.1453	0.1398	0.1575	0.1625	0.0952	0.0544	0.643738977	-0.3979442	shadows
-74.9389758	7.988934128	0.0128	0.0132	0.0148	0.01	0.0227	0.0631	0.0901	0.0818	0.093	0.1238	0.0443	0.0202	0.782135076	-0.499153976	shadows
-74.93526323	7.938821138	0.0171	0.0193	0.0194	0.0186	0.0282	0.0441	0.054	0.0473	0.0581	0.0614	0.0554	0.0405	0.435508346	-0.481283422	shadows
-74.91817922	7.607476238	0.0331	0.0362	0.0425	0.033	0.0513	0.0995	0.1221	0.1125	0.1274	0.1578	0.0843	0.0485	0.546391753	-0.329652997	shadows
-74.9787222	7.964243694	0.0158	0.016	0.0146	0.0101	0.0199	0.0578	0.0832	0.0718	0.0869	0.0869	0.0403	0.0221	0.753357753	-0.468123862	shadows
-74.99850305	7.907799806	0.0737	0.0393	0.0458	0.033	0.0524	0.1025	0.1302	0.1257	0.1355	0.1652	0.0932	0.0535	0.584120983	-0.341007194	shadows
-74.97681675	7.963791314	0.0236	0.0151	0.0209	0.0121	0.0252	0.0721	0.0972	0.0884	0.1042	0.1157	0.0452	0.0247	0.75920398	-0.367624811	shadows
-74.98698054	7.923629389	0.0201	0.0203	0.0215	0.012	0.0275	0.0822	0.1102	0.0985	0.117	0.1516	0.053	0.0266	0.78280543	-0.422818792	shadows
-74.91736313	7.608290198	0.0293	0.033	0.0364	0.0309	0.0443	0.0872	0.1035	0.0977	0.1101	0.1256	0.081	0.0487	0.519440124	-0.379897785	shadows
-74.91654717	7.608380499	0.0292	0.0332	0.037	0.0259	0.0472	0.0923	0.1145	0.1142	0.1193	0.1253	0.0818	0.0485	0.630264097	-0.377104377	shadows
-74.91093381	8.001050071	0.0231	0.0194	0.0278	0.016	0.0395	0.1011	0.1299	0.1041	0.1351	0.1389	0.0637	0.0322	0.733555371	-0.392349727	shadows
-74.99768654	7.90562886	0.0428	0.0397	0.0441	0.036	0.0547	0.1084	0.1344	0.1231	0.1436	0.1476	0.0947	0.0554	0.547454431	-0.364553314	shadows
-74.97074153	7.905175562	0.0238	0.025	0.0249	0.0167	0.0295	0.0644	0.0853	0.0769	0.0868	0.1055	0.051	0.0321	0.643162393	-0.343873518	shadows
-74.93561753	7.994089584	0.0377	0.0286	0.0395	0.0282	0.0669	0.1544	0.204	0.1663	0.2162	0.246	0.1107	0.065	0.710025707	-0.474034621	shadows
-74.98590022	7.672160537	0.0353	0.0316	0.0365	0.0266	0.0485	0.123	0.1586	0.1505	0.1663	0.1908	0.0813	0.0443	0.699604743	-0.380305603	shadows
-74.97028794	7.904813706	0.0249	0.0244	0.0257	0.0182	0.0323	0.0756	0.1023	0.0944	0.1022	0.1211	0.0535	0.0303	0.676731794	-0.351010101	shadows
-74.96139616	7.913858571	0.0572	0.0348	0.0407	0.0397	0.0534	0.0877	0.1097	0.0996	0.1189	0.1859	0.0883	0.0584	0.430007179	-0.368992248	shadows
-74.99160745	7.934303298	0.0227	0.0222	0.0298	0.0185	0.0445	0.1016	0.1212	0.1071	0.1271	0.1274	0.0689	0.0349	0.705414013	-0.396149949	shadows
-74.98389577	7.924081561	0.0276	0.0306	0.0412	0.0314	0.0613	0.1369	0.1666	0.1266	0.1774	0.199	0.0994	0.0482	0.602531646	-0.413940256	shadows
-74.95503711	7.989569375	0.0213	0.024	0.0296	0.0196	0.0413	0.0825	0.1034	0.0857	0.1033	0.139	0.0634	0.0332	0.627730294	-0.36344086	shadows
-74.90306378	7.895486566	0.0214	0.0315	0.0351	0.0357	0.041	0.0622	0.0751	0.0677	0.08	0.0914	0.0604	0.0377	0.309477756	-0.264921466	shadows
-74.98562824	7.670984587	0.036	0.0341	0.0429	0.0288	0.062	0.1423	0.1787	0.1546	0.1942	0.2133	0.0903	0.0454	0.685932388	-0.355855856	shadows
-74.90270069	7.89639104	0.0161	0.0346	0.0365	0.0402	0.0344	0.0585	0.0697	0.0672	0.0755	0.1053	0.0511	0.0306	0.251396648	-0.166666667	shadows
-74.95235223	7.660398727	0.0308	0.0314	0.0391	0.0312	0.0476	0.0908	0.1094	0.1058	0.1191	0.1543	0.0754	0.0459	0.544525547	-0.317030568	shadows
-74.93616194	7.994361035	0.0294	0.032	0.0583	0.043	0.0928	0.2123	0.2649	0.2292	0.2947	0.2833	0.1503	0.0809	0.684055841	-0.441035475	shadows
-74.95244287	7.660670108	0.0317	0.0324	0.0367	0.03	0.046	0.0891	0.1119	0.0991	0.1219	0.1428	0.0744	0.0455	0.535243997	-0.339333933	shadows
-74.90397012	7.899285921	0.0125	0.0209	0.0232	0.0164	0.031	0.0615	0.0782	0.0731	0.0825	0.086	0.0546	0.0304	0.633519553	-0.403598972	shadows
-74.97194615	7.522724483	0.0357	0.0432	0.0469	0.04	0.0602	0.1076	0.1304	0.1236	0.1348	0.2317	0.0956	0.0562	0.511002445	-0.341754386	shadows
-74.99959174	7.909428015	0.0401	0.0349	0.0386	0.025	0.0517	0.1014	0.1266	0.1209	0.1347	0.1357	0.0863	0.0496	0.65729952	-0.381905524	shadows
-74.93552765	7.988571783	0.0127	0.0136	0.0158	0.01	0.0184	0.0505	0.0688	0.0691	0.0742	0.0683	0.0359	0.0192	0.747155499	-0.388781431	shadows
-74.98707122	7.92498623	0.024	0.0243	0.0317	0.0223	0.0449	0.0964	0.1222	0.1049	0.1309	0.1674	0.075	0.0398	0.649371069	-0.405810684	shadows
-74.9520803	7.659584584	0.029	0.0313	0.0378	0.028	0.0474	0.0902	0.1101	0.1051	0.1156	0.1859	0.0748	0.0467	0.579263711	-0.328596803	shadows
-74.95058851	8.008021792	0.0225	0.0281	0.0397	0.032	0.0586	0.1336	0.1638	0.1461	0.1741	0.1706	0.0935	0.0439	0.640651319	-0.403903904	shadows
-74.98716179	7.930051761	0.0298	0.034	0.0391	0.0292	0.0574	0.1125	0.1394	0.1173	0.1473	0.1526	0.0878	0.0498	0.601365188	-0.383766745	shadows
-74.98743395	7.931137239	0.0468	0.0332	0.0443	0.0312	0.0675	0.1596	0.2065	0.1647	0.2247	0.2327	0.1133	0.069	0.681470138	-0.437817259	shadows
-74.98716196	7.924805321	0.0235	0.0221	0.0276	0.0166	0.0408	0.1076	0.1423	0.1281	0.1549	0.176	0.0698	0.0342	0.770559779	-0.433264887	shadows
-74.97076778	7.523086236	0.0353	0.04	0.0481	0.0351	0.0591	0.1146	0.1377	0.1327	0.1456	0.238	0.0961	0.0562	0.581644815	-0.332871012	shadows
-74.9347191	7.937192849	0.0174	0.0235	0.0227	0.023	0.0267	0.0387	0.0503	0.0461	0.0547	0.0817	0.053	0.0367	0.334298119	-0.400264201	shadows
-74.94724326	7.911324257	0.0228	0.0214	0.0307	0.016	0.0474	0.1308	0.1722	0.1354	0.1863	0.2043	0.0952	0.0442	0.788639366	-0.512311358	shadows
-74.95141609	7.915847558	0.0281	0.0272	0.027	0.0281	0.0403	0.0562	0.0679	0.0638	0.0707	0.0957	0.0669	0.0456	0.388465724	-0.424920128	shadows
-74.98635365	7.670441869	0.0408	0.0432	0.0562	0.0398	0.0655	0.1515	0.1843	0.179	0.1907	0.2436	0.1043	0.0527	0.636197441	-0.299688474	shadows
-74.99968246	7.909518471	0.0387	0.0366	0.0422	0.0332	0.0538	0.0995	0.1229	0.1211	0.1299	0.1385	0.093	0.0531	0.569669475	-0.375739645	shadows
-74.97185553	7.522453104	0.0374	0.0445	0.0511	0.0376	0.0628	0.1164	0.1383	0.1336	0.1465	0.2334	0.0976	0.0565	0.560747664	-0.312710155	shadows
-74.99941029	7.908704368	0.0463	0.041	0.045	0.0331	0.0545	0.1087	0.1371	0.1284	0.1426	0.1624	0.0922	0.0527	0.590092879	-0.344023324	shadows
-74.95132534	7.916028459	0.0306	0.0242	0.0274	0.0321	0.0419	0.0539	0.0659	0.0543	0.0713	0.1058	0.0777	0.0534	0.256944444	-0.478591817	shadows
-74.95150682	7.915847568	0.0279	0.0245	0.0254	0.0272	0.0412	0.0577	0.0684	0.066	0.0701	0.094	0.0672	0.0456	0.416309013	-0.451403888	shadows
-74.95271493	7.660217853	0.0275	0.0316	0.0351	0.0278	0.044	0.0954	0.1224	0.1088	0.1298	0.1542	0.0712	0.043	0.592972182	-0.339604892	shadows
-74.95168827	7.915847589	0.0273	0.0248	0.0289	0.0292	0.0437	0.0609	0.0724	0.0638	0.0724	0.0905	0.0689	0.0456	0.372043011	-0.408997955	shadows
-74.90397	7.899828656	0.0139	0.0192	0.0213	0.0151	0.0327	0.0743	0.0919	0.0879	0.1001	0.1008	0.0536	0.028	0.706796117	-0.431241656	shadows
-74.99922884	7.909337559	0.0439	0.0359	0.0407	0.031	0.0503	0.0976	0.1226	0.1116	0.1271	0.13	0.0853	0.0501	0.565217391	-0.353968254	shadows
-74.97826632	8.005762791	0.0238	0.0263	0.032	0.0185	0.035	0.0655	0.078	0.0824	0.0794	0.071	0.046	0.028	0.633300297	-0.179487179	shadows
-74.93544494	7.937283418	0.02	0.0194	0.0242	0.0232	0.0331	0.0583	0.0713	0.062	0.0728	0.0903	0.0535	0.0344	0.455399061	-0.377091377	shadows
-74.97746849	7.654521068	0.0321	0.0296	0.0341	0.0243	0.0446	0.1067	0.1372	0.12	0.1473	0.1681	0.0723	0.0381	0.663201663	-0.359022556	shadows
-74.96375507	7.913406503	0.0226	0.0251	0.0314	0.0232	0.0384	0.0808	0.0952	0.0854	0.104	0.1236	0.0696	0.0398	0.572744015	-0.378217822	shadows
-74.98698049	7.925076683	0.024	0.0249	0.0331	0.0219	0.0435	0.0952	0.12	0.1065	0.1266	0.1561	0.0715	0.0379	0.658878505	-0.367112811	shadows
-74.99070014	7.934665102	0.0267	0.0236	0.0284	0.0174	0.0362	0.0867	0.1083	0.1079	0.1135	0.1243	0.0596	0.0308	0.72226656	-0.354545455	shadows
-74.90342669	7.895396194	0.0189	0.0197	0.0219	0.013	0.0281	0.0607	0.0759	0.0667	0.0797	0.0927	0.0465	0.0248	0.673776662	-0.359649123	shadows
-74.9520802	7.660489154	0.0378	0.0383	0.0413	0.0355	0.056	0.0934	0.1109	0.1058	0.1168	0.1788	0.0835	0.0527	0.497523001	-0.338141026	shadows
-74.93562598	7.939997119	0.0196	0.013	0.0194	0.0119	0.0331	0.0886	0.1157	0.1008	0.1207	0.1608	0.0622	0.0323	0.788819876	-0.524509804	shadows
-74.96983423	7.906080057	0.0307	0.0282	0.0315	0.0247	0.0389	0.07	0.0874	0.0816	0.0914	0.1258	0.063	0.0391	0.535277516	-0.333333333	shadows
-74.97076774	7.523628981	0.0399	0.054	0.057	0.0454	0.0687	0.1377	0.1668	0.1661	0.1762	0.2664	0.1079	0.0599	0.570685579	-0.308671922	shadows
-74.98743395	7.931227695	0.0569	0.0364	0.0528	0.0389	0.0794	0.185	0.2365	0.2099	0.258	0.2554	0.137	0.0921	0.687299035	-0.443624868	shadows
-74.98652684	7.925528948	0.026	0.022	0.0312	0.0196	0.0439	0.0958	0.12	0.1129	0.1293	0.173	0.0739	0.0388	0.704150943	-0.406279734	shadows
-74.93562637	7.937464358	0.019	0.0208	0.0249	0.0187	0.0303	0.0691	0.086	0.0724	0.0944	0.0918	0.055	0.0282	0.58946213	-0.376720901	shadows
-74.98933916	7.93529826	0.0613	0.0306	0.0378	0.032	0.066	0.1496	0.2009	0.1292	0.223	0.2428	0.126	0.0935	0.602977667	-0.538461538	shadows
-74.9079407	7.578980181	0.0281	0.0336	0.0451	0.0297	0.0641	0.1397	0.1596	0.1577	0.1707	0.226	0.0934	0.0485	0.68303095	-0.348736462	shadows
-74.98716195	7.925167145	0.0255	0.0241	0.0319	0.0196	0.0504	0.1154	0.1407	0.1144	0.1553	0.1826	0.0907	0.0491	0.707462687	-0.479608483	shadows
-74.95022556	8.007750382	0.0239	0.0346	0.0469	0.0356	0.071	0.1413	0.1705	0.1581	0.179	0.1596	0.1091	0.0547	0.63242127	-0.398717949	shadows
-74.97192087	7.906261114	0.026	0.0208	0.0218	0.0149	0.0301	0.072	0.0969	0.0877	0.0997	0.1219	0.0516	0.0308	0.709551657	-0.40599455	shadows
-74.90261005	7.896029196	0.0224	0.0554	0.0585	0.0639	0.0492	0.0771	0.0892	0.0959	0.0861	0.1169	0.0618	0.0388	0.200250313	-0.027431421	shadows
-74.90469675	7.895577397	0.015	0.0184	0.0225	0.0126	0.0279	0.074	0.1019	0.0999	0.1055	0.1101	0.0471	0.023	0.776	-0.353448276	shadows
-74.98626291	7.672522376	0.0352	0.0312	0.0384	0.0262	0.0475	0.1119	0.1494	0.1381	0.161	0.1672	0.0788	0.0432	0.681071211	-0.344709898	shadows
-74.90839409	7.578437533	0.0278	0.0309	0.0395	0.0265	0.0523	0.1086	0.1294	0.1201	0.137	0.2119	0.0773	0.0431	0.638472033	-0.323630137	shadows
-74.94714306	7.985407486	0.0142	0.0161	0.0195	0.0115	0.0232	0.0496	0.0615	0.0571	0.064	0.0545	0.0395	0.0217	0.664723032	-0.338983051	shadows
-74.95244289	7.660489194	0.0302	0.0318	0.0377	0.0316	0.0464	0.0911	0.1137	0.1	0.1206	0.1456	0.0749	0.0454	0.519756839	-0.330373002	shadows
-74.90388032	7.895305842	0.0163	0.0183	0.0205	0.0119	0.0227	0.0606	0.0805	0.0776	0.089	0.1009	0.0425	0.0208	0.734078212	-0.349206349	shadows
-74.95341199	7.916571432	0.0235	0.0214	0.0241	0.0175	0.034	0.0658	0.0808	0.0749	0.0841	0.0967	0.0567	0.0322	0.621212121	-0.403465347	shadows
-74.97146734	7.9049947	0.0235	0.0226	0.0233	0.0165	0.0291	0.0571	0.0738	0.0715	0.0774	0.1016	0.0484	0.0317	0.625	-0.350069735	shadows
-74.97746854	7.653435583	0.0341	0.0306	0.036	0.0266	0.0576	0.1506	0.2026	0.126	0.2232	0.2275	0.0992	0.0514	0.651376147	-0.467455621	shadows
-74.9347187	7.93972561	0.0128	0.0104	0.0134	0.0085	0.0205	0.0586	0.0837	0.0759	0.088	0.0984	0.043	0.0239	0.798578199	-0.524822695	shadows
-74.91636592	7.608018635	0.0298	0.0328	0.0384	0.0289	0.047	0.0915	0.1131	0.1073	0.12	0.1282	0.0786	0.0463	0.575624082	-0.343589744	shadows
-74.97935524	8.006396035	0.0265	0.0234	0.0248	0.0188	0.0313	0.0521	0.0653	0.0443	0.0646	0.0693	0.0422	0.0261	0.404120444	-0.259701493	shadows
-74.95095158	8.007298192	0.0215	0.025	0.0326	0.0232	0.0432	0.0881	0.1149	0.1058	0.1226	0.1541	0.0712	0.037	0.640310078	-0.371868979	shadows
-74.97037862	7.905356448	0.024	0.0241	0.0264	0.0171	0.0324	0.0732	0.0959	0.0918	0.0981	0.1107	0.051	0.0304	0.685950413	-0.317829457	shadows
-74.93580758	7.939092589	0.017	0.0175	0.0227	0.0157	0.0324	0.0651	0.0757	0.0701	0.0831	0.0766	0.058	0.033	0.634032634	-0.437422553	shadows
-74.97230872	7.522724506	0.0358	0.0418	0.0499	0.0381	0.0627	0.1244	0.149	0.1406	0.1556	0.2499	0.0991	0.0562	0.573587017	-0.330201342	shadows
-74.94668929	7.985859705	0.0133	0.0145	0.0184	0.0132	0.0234	0.0501	0.0631	0.0572	0.0651	0.0569	0.0436	0.025	0.625	-0.406451613	shadows
-74.94923001	7.986221847	0.0205	0.0226	0.0298	0.0207	0.0564	0.1361	0.1695	0.1241	0.1874	0.184	0.0891	0.0431	0.714088398	-0.498738436	shadows
-74.9983216	7.907709349	0.0873	0.0346	0.0397	0.0302	0.0544	0.1067	0.1367	0.1219	0.1453	0.1737	0.0993	0.0631	0.602892834	-0.428776978	shadows
-74.93535419	7.93737386	0.0194	0.0212	0.0218	0.0239	0.0318	0.0512	0.0621	0.0478	0.0647	0.0835	0.0549	0.0354	0.333333333	-0.431551499	shadows
-74.96402732	7.912592423	0.0222	0.0252	0.03	0.0242	0.0345	0.0706	0.0858	0.0785	0.0897	0.098	0.0579	0.0321	0.52872444	-0.317406143	shadows
-74.97853857	8.00567235	0.0238	0.0269	0.0288	0.0195	0.0315	0.0545	0.0639	0.0677	0.0626	0.0712	0.0421	0.0246	0.552752294	-0.187588152	shadows
-74.90406078	7.899557309	0.0124	0.0209	0.0252	0.017	0.0351	0.0703	0.0871	0.0827	0.0902	0.0891	0.0553	0.0289	0.658976931	-0.373913043	shadows
-74.95368407	7.917476021	0.0276	0.0318	0.0447	0.0357	0.0487	0.0908	0.11	0.1412	0.1137	0.12	0.0752	0.0414	0.596382137	-0.254378649	shadows
-74.97194617	7.522543568	0.0368	0.0422	0.0483	0.0451	0.0641	0.1111	0.134	0.1239	0.1389	0.2329	0.0985	0.0574	0.466272189	-0.341961853	shadows
-74.97953884	7.964062824	0.0234	0.0186	0.0197	0.0127	0.0253	0.0774	0.1057	0.087	0.1145	0.182	0.05	0.028	0.745235707	-0.43472023	shadows
-74.97173951	7.904994719	0.0234	0.0204	0.0216	0.0178	0.0273	0.0592	0.0774	0.0617	0.0813	0.1087	0.047	0.0303	0.552201258	-0.370262391	shadows
-74.99823087	7.907437981	0.073	0.0347	0.0407	0.0291	0.0528	0.104	0.1307	0.1286	0.1439	0.1575	0.0938	0.055	0.630944832	-0.394795539	shadows
-74.93598894	7.939725808	0.0182	0.0213	0.0275	0.0175	0.0362	0.0787	0.0977	0.0903	0.1021	0.0979	0.0598	0.0355	0.675324675	-0.369988545	shadows
-74.95316853	7.658046935	0.0347	0.0348	0.038	0.0307	0.0512	0.1117	0.1402	0.1146	0.15	0.2402	0.08	0.0457	0.577426015	-0.355932203	shadows
-74.95214171	7.917475847	0.0262	0.0346	0.0471	0.0455	0.0621	0.097	0.1155	0.1175	0.1207	0.1471	0.0969	0.0522	0.441717791	-0.345833333	shadows
-74.9713765	7.906622901	0.0333	0.0367	0.0543	0.0459	0.0528	0.0859	0.1036	0.1052	0.1104	0.1278	0.0812	0.0507	0.392455328	-0.198523985	shadows
-74.99795871	7.906081141	0.0429	0.0361	0.0466	0.0362	0.058	0.1118	0.1416	0.1282	0.15	0.1541	0.1024	0.058	0.559610706	-0.374496644	shadows
-74.9630293	7.913044615	0.0213	0.0249	0.0281	0.0197	0.0361	0.0697	0.0868	0.0813	0.0915	0.0957	0.0583	0.0352	0.60990099	-0.349537037	shadows
-74.9708584	7.523448072	0.0365	0.044	0.0509	0.038	0.0632	0.1229	0.1493	0.1497	0.1564	0.2491	0.0991	0.0553	0.595098562	-0.321333333	shadows
-74.94968117	8.007026672	0.0223	0.0229	0.0329	0.0209	0.0572	0.1336	0.1657	0.1332	0.1774	0.1542	0.0914	0.0482	0.728747567	-0.470635559	shadows
-74.99877522	7.908252087	0.0503	0.04	0.0426	0.035	0.0533	0.0959	0.1197	0.1139	0.1266	0.1453	0.0935	0.0555	0.529885829	-0.373989713	shadows
-74.95316852	7.658137392	0.0336	0.0348	0.0371	0.0314	0.0488	0.1009	0.127	0.1084	0.1322	0.2257	0.0747	0.044	0.550786838	-0.336314848	shadows
-74.93544495	7.937192962	0.0205	0.0216	0.0249	0.0226	0.0346	0.0582	0.072	0.0652	0.0736	0.0934	0.0546	0.0335	0.485193622	-0.373584906	shadows
-74.94832978	7.928872828	0.0248	0.0208	0.0241	0.0171	0.04	0.0882	0.1125	0.0706	0.1225	0.1578	0.0739	0.0389	0.610034208	-0.508163265	shadows
-74.97122101	7.522814893	0.035	0.0422	0.0491	0.0365	0.0581	0.1111	0.1352	0.1309	0.1434	0.2296	0.0945	0.0545	0.563918757	-0.316155989	shadows
-74.9872525	7.93077541	0.0361	0.0271	0.0342	0.021	0.0507	0.1101	0.1382	0.1644	0.145	0.1779	0.0817	0.0467	0.773462783	-0.409836066	shadows
-74.9859909	7.672070083	0.0354	0.0315	0.039	0.0262	0.0493	0.1207	0.1581	0.1569	0.1625	0.1964	0.0797	0.0432	0.713817586	-0.342881213	shadows
-74.98952078	7.929237724	0.0423	0.0435	0.0568	0.0498	0.0775	0.1289	0.1528	0.1443	0.1606	0.1915	0.1287	0.0692	0.486862442	-0.387601078	shadows
-74.93426516	7.939001893	0.0138	0.0092	0.013	0.0084	0.0177	0.0524	0.0761	0.0735	0.0804	0.0864	0.0398	0.023	0.794871795	-0.507575758	shadows
-74.99977319	7.909880295	0.0372	0.0353	0.038	0.0305	0.0479	0.0798	0.1001	0.0905	0.1043	0.1438	0.0746	0.0459	0.495867769	-0.325044405	shadows
-74.93553567	7.937283432	0.0202	0.0198	0.0243	0.0202	0.0331	0.0621	0.0758	0.0692	0.079	0.0937	0.0546	0.0325	0.548098434	-0.384030418	shadows
-74.97692459	7.652259613	0.0347	0.0358	0.0414	0.0301	0.0507	0.1009	0.1245	0.125	0.13	0.1487	0.0758	0.0422	0.611863314	-0.293515358	shadows
-74.93453731	7.939273303	0.0111	0.0116	0.0124	0.0081	0.0191	0.0521	0.0743	0.0715	0.0785	0.0771	0.0382	0.0221	0.796482412	-0.509881423	shadows
-74.96502533	7.912230684	0.0245	0.0255	0.0263	0.0187	0.0352	0.0803	0.104	0.0949	0.11	0.1458	0.0546	0.0293	0.670774648	-0.349814586	shadows
-74.99941029	7.909066191	0.0448	0.0412	0.0445	0.035	0.0553	0.1116	0.137	0.1278	0.1408	0.1426	0.0938	0.0553	0.57002457	-0.356471439	shadows
-74.97185553	7.522362647	0.0378	0.0428	0.0476	0.0356	0.0624	0.1218	0.1455	0.1348	0.1528	0.236	0.097	0.0552	0.582159624	-0.341632089	shadows
-74.94733412	7.910238798	0.0232	0.0226	0.029	0.0159	0.0361	0.0902	0.1138	0.1224	0.1195	0.152	0.0544	0.0269	0.770065076	-0.304556355	shadows
-74.98634544	7.923810281	0.0174	0.0183	0.0232	0.0118	0.0257	0.0723	0.0975	0.095	0.099	0.1086	0.0486	0.026	0.779026217	-0.353760446	shadows
-74.93480955	7.939001978	0.014	0.0177	0.0175	0.0213	0.0249	0.0343	0.0447	0.0376	0.0492	0.0665	0.0491	0.036	0.276740238	-0.474474474	shadows
-74.91401937	7.999965259	0.0318	0.0258	0.0396	0.0233	0.057	0.1576	0.2008	0.2013	0.2144	0.2498	0.0979	0.0443	0.792520036	-0.424	shadows
-74.97185552	7.522634019	0.0363	0.0426	0.0471	0.0385	0.0625	0.1084	0.1325	0.1284	0.1358	0.2317	0.0981	0.0578	0.538645896	-0.351239669	shadows
-74.99088158	7.935388753	0.0239	0.0208	0.0265	0.0141	0.0359	0.0932	0.1193	0.1067	0.1239	0.1291	0.0614	0.0328	0.766556291	-0.397042093	shadows
-74.9342651	7.939363716	0.0192	0.0113	0.0115	0.0073	0.0189	0.0572	0.0819	0.0759	0.0874	0.1015	0.0406	0.023	0.824519231	-0.558541267	shadows
-74.97110444	7.904994675	0.024	0.0304	0.0265	0.0253	0.032	0.0553	0.0682	0.0556	0.0721	0.1014	0.0527	0.0343	0.374536465	-0.330808081	shadows
-74.99814015	7.907437981	0.0827	0.0364	0.0447	0.0343	0.0573	0.107	0.1333	0.1293	0.1488	0.1734	0.1025	0.0659	0.580684597	-0.392663043	shadows
-74.98716195	7.924895777	0.024	0.0228	0.028	0.0164	0.043	0.103	0.1338	0.1201	0.1454	0.1777	0.0743	0.0376	0.75970696	-0.45259042	shadows
-74.99895666	7.911327589	0.0388	0.0317	0.0327	0.0252	0.0457	0.1029	0.1334	0.1194	0.138	0.1467	0.0803	0.0467	0.651452282	-0.421238938	shadows
-74.99904739	7.910603942	0.0404	0.0379	0.0416	0.0378	0.051	0.0968	0.1207	0.1089	0.1262	0.1304	0.0922	0.0547	0.484662577	-0.378176383	shadows
-74.95235234	7.6594037	0.0286	0.0331	0.0374	0.0314	0.0509	0.0869	0.108	0.1012	0.1118	0.1846	0.0774	0.0481	0.526395173	-0.348432056	shadows
-74.9548557	7.988936166	0.0195	0.0207	0.0314	0.0169	0.0406	0.1006	0.1251	0.1424	0.1259	0.1416	0.0637	0.0283	0.78782172	-0.339642482	shadows
-74.94986512	7.986855114	0.0201	0.0236	0.0292	0.0169	0.04	0.0856	0.1055	0.1282	0.1103	0.1486	0.0613	0.0293	0.767057202	-0.354696133	shadows
-74.93535422	7.937192948	0.0202	0.0236	0.0246	0.0254	0.0319	0.0525	0.0642	0.0553	0.065	0.0902	0.0549	0.0351	0.370508055	-0.381132075	shadows
-74.98643616	7.923810284	0.0177	0.019	0.0207	0.0115	0.0248	0.0692	0.0947	0.0948	0.0974	0.1112	0.049	0.026	0.783631232	-0.406025825	shadows
-74.93471869	7.939816066	0.013	0.0103	0.0131	0.0088	0.0208	0.0606	0.0893	0.0815	0.0932	0.103	0.0437	0.0243	0.805094131	-0.538732394	shadows
-74.98679906	7.92435303	0.02	0.0174	0.022	0.0125	0.0302	0.0888	0.1202	0.1062	0.1248	0.1323	0.0562	0.0288	0.789385004	-0.437340153	shadows
-74.95095171	8.006212726	0.0179	0.0197	0.0262	0.0122	0.0289	0.0803	0.1076	0.1508	0.1123	0.1321	0.0519	0.0242	0.850306748	-0.329065301	shadows
-74.98679906	7.924443486	0.0203	0.0176	0.0223	0.013	0.0306	0.0852	0.1134	0.1054	0.1258	0.1329	0.0552	0.0289	0.780405405	-0.424516129	shadows
-74.96965279	7.905899132	0.0316	0.0269	0.0308	0.0233	0.039	0.0686	0.0859	0.0771	0.0889	0.1267	0.0622	0.0382	0.535856574	-0.337634409	shadows
-74.95253353	7.660760575	0.0288	0.0299	0.0353	0.0268	0.0435	0.0898	0.1143	0.105	0.1249	0.13	0.0727	0.0437	0.593323217	-0.346296296	shadows
-74.98897638	7.930232724	0.0352	0.0369	0.0468	0.0428	0.0734	0.1148	0.134	0.1187	0.1439	0.1844	0.1202	0.0661	0.46996904	-0.439520958	shadows
-74.93984682	7.608655728	0.0291	0.03	0.0355	0.0248	0.0473	0.1093	0.1402	0.131	0.1501	0.2211	0.0772	0.043	0.681643132	-0.370008873	shadows
-74.99841233	7.905176583	0.0455	0.0355	0.0411	0.0291	0.0543	0.117	0.1506	0.1447	0.1573	0.1606	0.0855	0.0488	0.665132336	-0.3507109	shadows
-74.90757805	7.579161018	0.0294	0.034	0.0439	0.0293	0.0633	0.1335	0.1583	0.152	0.1649	0.2436	0.0943	0.0521	0.67677882	-0.364688857	shadows
-74.92946205	7.905803823	0.0275	0.0304	0.0391	0.0314	0.0341	0.0364	0.0428	0.0618	0.0458	0.1015	0.0332	0.0197	0.326180258	0.081604426	shadows
-74.97681679	7.963067668	0.0171	0.0156	0.0179	0.0125	0.0232	0.0598	0.0807	0.0785	0.086	0.0905	0.0431	0.0232	0.725274725	-0.413114754	shadows
-74.98670815	7.930051746	0.0315	0.034	0.0466	0.0375	0.0642	0.1143	0.1378	0.1297	0.1446	0.1457	0.0947	0.052	0.551435407	-0.340410474	shadows
-74.97448399	7.525347907	0.0452	0.0436	0.0522	0.0413	0.075	0.1427	0.1661	0.1634	0.18	0.3218	0.1217	0.0678	0.596482658	-0.399654974	shadows
-74.93643513	7.988210101	0.0101	0.0141	0.0114	0.0071	0.0143	0.0405	0.0592	0.0575	0.063	0.0571	0.0326	0.0183	0.780185759	-0.481818182	shadows
-74.97103969	7.523357627	0.0353	0.04	0.0459	0.0345	0.058	0.1168	0.14	0.132	0.1477	0.2364	0.0909	0.0499	0.585585586	-0.328947368	shadows
-74.98652667	7.93050402	0.0354	0.0366	0.0437	0.0393	0.0665	0.111	0.1336	0.123	0.1377	0.1879	0.1074	0.062	0.515711645	-0.421575116	shadows
-74.98634544	7.923538913	0.0181	0.0187	0.0235	0.0135	0.0281	0.0743	0.102	0.0965	0.1044	0.1089	0.0477	0.0267	0.754545455	-0.33988764	shadows
-74.98734322	7.931137236	0.0498	0.0281	0.0418	0.0305	0.079	0.177	0.228	0.1686	0.2523	0.2426	0.1275	0.0785	0.693621296	-0.506202008	shadows
-74.93517245	7.939182947	0.0147	0.0152	0.0172	0.0137	0.0242	0.0477	0.0615	0.0564	0.067	0.0703	0.0487	0.032	0.609129815	-0.477996965	shadows
-74.91709125	7.607747403	0.03	0.0295	0.0332	0.0259	0.0425	0.0922	0.1145	0.1092	0.1215	0.122	0.0738	0.0413	0.616580311	-0.379439252	shadows
-74.95307784	7.658137382	0.0336	0.0377	0.0399	0.0334	0.0499	0.0949	0.1183	0.1036	0.124	0.2227	0.0753	0.0457	0.512408759	-0.307291667	shadows
-74.97881073	8.007029196	0.0237	0.0208	0.0233	0.0184	0.0297	0.0531	0.0673	0.055	0.0667	0.0684	0.0454	0.0266	0.498637602	-0.321688501	shadows
-74.99850304	7.910423028	0.0454	0.0359	0.0407	0.0315	0.0545	0.1078	0.1316	0.1262	0.1376	0.1413	0.0926	0.0555	0.600507292	-0.389347337	shadows
-74.9706771	7.523628975	0.04	0.0506	0.0577	0.044	0.0705	0.1432	0.1706	0.1732	0.1822	0.2714	0.1114	0.0629	0.594843462	-0.317563572	shadows
-74.9545834	7.989569326	0.0196	0.0245	0.03	0.0242	0.0422	0.0835	0.1051	0.0814	0.1092	0.1089	0.0691	0.0365	0.541666667	-0.394550959	shadows
-74.99841233	7.905628863	0.044	0.0366	0.0405	0.0292	0.0566	0.1161	0.1454	0.1411	0.1565	0.1586	0.093	0.0534	0.657075749	-0.393258427	shadows
-74.95289622	7.660670158	0.0272	0.0293	0.0354	0.0247	0.0428	0.098	0.1277	0.1209	0.1339	0.1419	0.071	0.0414	0.660714286	-0.334586466	shadows
-74.90922774	7.91891601	0.0221	0.0172	0.0257	0.0127	0.0302	0.0853	0.1091	0.1178	0.1144	0.1231	0.0508	0.0253	0.805363985	-0.328104575	shadows
-74.95416561	7.660760752	0.0275	0.0306	0.0342	0.025	0.0451	0.0963	0.1169	0.1173	0.1257	0.1386	0.076	0.0429	0.648629656	-0.379310345	shadows
-74.98652683	7.925800316	0.0288	0.0231	0.0331	0.024	0.0694	0.1574	0.2011	0.1165	0.2255	0.2144	0.1245	0.0697	0.658362989	-0.579949239	shadows
-74.98643595	7.930232649	0.0353	0.0346	0.047	0.0362	0.0659	0.1232	0.1418	0.1402	0.1502	0.1869	0.1043	0.0566	0.589569161	-0.378717779	shadows
-74.98707104	7.930684949	0.0342	0.0365	0.0463	0.0412	0.0601	0.1238	0.1544	0.1462	0.1639	0.1655	0.0938	0.0514	0.560298826	-0.33904354	shadows
-74.9764514	8.005762691	0.0267	0.0248	0.0312	0.0218	0.0339	0.0635	0.0754	0.0764	0.0749	0.0682	0.047	0.0292	0.556008147	-0.202046036	shadows
-74.97239935	7.522995884	0.0345	0.0359	0.0458	0.0312	0.0571	0.1227	0.1526	0.1416	0.1599	0.257	0.089	0.0496	0.638888889	-0.320474777	shadows
-74.94750576	7.98748801	0.0163	0.0185	0.0235	0.0131	0.0379	0.102	0.1341	0.0997	0.1375	0.1313	0.0653	0.0344	0.767730496	-0.470720721	shadows
-74.95022557	8.007659927	0.0238	0.032	0.045	0.0329	0.0707	0.1407	0.1668	0.1533	0.1762	0.1574	0.1113	0.058	0.646616541	-0.424184261	shadows
-74.95235232	7.659584614	0.0287	0.0344	0.0414	0.0368	0.0535	0.0866	0.1074	0.1023	0.1114	0.1847	0.0773	0.0477	0.470884256	-0.302443134	shadows
-74.97708911	7.961077658	0.0199	0.0177	0.021	0.013	0.029	0.0773	0.1009	0.0886	0.1038	0.1352	0.0509	0.0273	0.744094488	-0.415855355	shadows
-74.90830337	7.578708885	0.0276	0.034	0.037	0.0285	0.0516	0.1114	0.128	0.1243	0.1377	0.2158	0.0773	0.0426	0.626963351	-0.352580927	shadows
-74.96974356	7.905356403	0.0267	0.0286	0.0328	0.0265	0.0407	0.0681	0.0841	0.0812	0.0876	0.1214	0.0632	0.0395	0.507892293	-0.316666667	shadows
-74.94706189	7.910691043	0.0208	0.0203	0.025	0.0157	0.0357	0.0887	0.1131	0.1039	0.1149	0.1384	0.0578	0.0279	0.737458194	-0.396135266	shadows
-74.98806905	7.931499081	0.0474	0.0263	0.0336	0.0199	0.0517	0.1286	0.1561	0.1521	0.1696	0.2484	0.0849	0.0435	0.768604651	-0.432911392	shadows
-74.95214179	7.916842656	0.0263	0.0278	0.03	0.0345	0.051	0.0771	0.0943	0.0737	0.0949	0.0941	0.0843	0.0497	0.362292052	-0.475065617	shadows
-74.99768653	7.907076155	0.079	0.0368	0.0466	0.0394	0.0566	0.1068	0.1368	0.1252	0.1437	0.1787	0.1026	0.0656	0.52126367	-0.375335121	shadows
-74.97708902	7.962796316	0.0189	0.0179	0.0195	0.0134	0.0252	0.0641	0.0826	0.0807	0.0863	0.0793	0.0445	0.0242	0.715196599	-0.390625	shadows
-74.97790331	8.006305505	0.0216	0.0205	0.023	0.0183	0.0269	0.0433	0.0513	0.048	0.0559	0.0607	0.0405	0.0253	0.447963801	-0.275590551	shadows
-74.99931957	7.907709352	0.0463	0.0342	0.0382	0.0274	0.054	0.1173	0.1482	0.1387	0.1578	0.1597	0.0853	0.0483	0.670078266	-0.381376518	shadows
-74.93453734	7.939092391	0.0119	0.0115	0.0123	0.0082	0.0195	0.0445	0.0638	0.0606	0.0648	0.0713	0.0391	0.0247	0.761627907	-0.521400778	shadows
-74.94768742	7.986040744	0.0148	0.0147	0.0192	0.0135	0.0219	0.0441	0.0562	0.0581	0.0599	0.0553	0.0363	0.0194	0.622905028	-0.308108108	shadows
-74.98698055	7.923267566	0.0213	0.0197	0.0235	0.0139	0.0311	0.0837	0.1137	0.1021	0.1196	0.1695	0.055	0.0266	0.760344828	-0.401273885	shadows
-74.98661758	7.925076672	0.0232	0.0226	0.0314	0.0192	0.0468	0.1083	0.1304	0.1202	0.1352	0.1415	0.0731	0.0373	0.724533716	-0.399043062	shadows
-74.90931839	7.919277853	0.0275	0.0176	0.0206	0.0128	0.0281	0.0742	0.094	0.0931	0.1004	0.1208	0.0512	0.028	0.758262512	-0.426183844	shadows
-74.95250469	7.916842698	0.024	0.0226	0.0273	0.0239	0.0408	0.0661	0.0782	0.0731	0.0828	0.0867	0.0667	0.0407	0.507216495	-0.419148936	shadows
-74.9467792	7.992282061	0.0322	0.0376	0.0355	0.0218	0.0432	0.1126	0.1457	0.1456	0.1554	0.266	0.0842	0.0395	0.739545998	-0.406850459	shadows
-74.97881291	7.964786433	0.0178	0.0137	0.0168	0.0102	0.0245	0.0713	0.0989	0.0864	0.1044	0.1279	0.0476	0.0256	0.788819876	-0.47826087	shadows
-74.97137661	7.904994694	0.0236	0.0218	0.0247	0.0164	0.0301	0.0582	0.0751	0.0719	0.0804	0.1016	0.0482	0.0317	0.628539071	-0.322359396	shadows
-74.97192088	7.906170658	0.0252	0.0189	0.0218	0.0151	0.0308	0.0713	0.0975	0.0831	0.0985	0.1214	0.0476	0.0275	0.692464358	-0.371757925	shadows
-74.97074154	7.905085106	0.024	0.0241	0.0264	0.0197	0.0299	0.0614	0.0785	0.0753	0.0782	0.1049	0.0508	0.0335	0.585263158	-0.316062176	shadows
-74.99197033	7.936021966	0.0225	0.0227	0.0247	0.0148	0.0313	0.0881	0.1185	0.1074	0.127	0.1517	0.058	0.0298	0.757774141	-0.402660218	shadows
-74.99823088	7.906623878	0.0398	0.0366	0.0419	0.0322	0.0545	0.1153	0.1456	0.1276	0.1545	0.1534	0.0859	0.0505	0.596996245	-0.34428795	shadows
-74.9505885	8.008112248	0.0223	0.0264	0.0397	0.0308	0.0563	0.1378	0.1707	0.1557	0.1799	0.1726	0.0898	0.0388	0.669705094	-0.386872587	shadows
-74.97638047	7.654159181	0.032	0.0334	0.0386	0.0355	0.0522	0.1012	0.1226	0.1049	0.1329	0.1693	0.1001	0.0563	0.494301994	-0.443403028	shadows
-74.99804943	7.907257068	0.071	0.0382	0.0435	0.0386	0.0538	0.0996	0.1255	0.1108	0.1285	0.1608	0.0978	0.0602	0.483266399	-0.384288747	shadows
-74.97074157	7.904723282	0.0244	0.0254	0.0279	0.0173	0.0341	0.0673	0.0889	0.0848	0.0915	0.1101	0.0526	0.0318	0.661116552	-0.306832298	shadows
-74.98679905	7.924533942	0.0206	0.0179	0.0233	0.0131	0.0312	0.0887	0.1173	0.1092	0.1288	0.1335	0.0562	0.0289	0.78577269	-0.413836478	shadows
-74.93984656	7.610555328	0.0297	0.0303	0.0333	0.0254	0.0459	0.111	0.1423	0.1278	0.1523	0.2397	0.0787	0.0456	0.668407311	-0.405357143	shadows
-74.95262419	7.660851042	0.0286	0.0306	0.035	0.0274	0.0422	0.0911	0.1195	0.1172	0.1289	0.1296	0.0728	0.0429	0.621023513	-0.350649351	shadows
-74.95367611	7.988393303	0.0207	0.0227	0.0282	0.0173	0.0335	0.0733	0.0915	0.0928	0.0932	0.1462	0.0531	0.0271	0.685740236	-0.306273063	shadows
-74.99904739	7.908432999	0.0498	0.0358	0.043	0.0307	0.0528	0.1089	0.1352	0.1232	0.1424	0.1526	0.0926	0.0531	0.601039636	-0.365781711	shadows
-74.97028791	7.90517553	0.0245	0.0245	0.0263	0.0171	0.0324	0.0766	0.0955	0.0907	0.0997	0.1129	0.0529	0.0307	0.682745826	-0.335858586	shadows
-74.95268612	7.91702363	0.0234	0.0249	0.029	0.0247	0.0409	0.0674	0.0813	0.0743	0.0862	0.0882	0.0724	0.0419	0.501010101	-0.42800789	shadows
-74.9861723	7.670441864	0.0406	0.0426	0.051	0.039	0.0633	0.133	0.1631	0.1512	0.1675	0.2241	0.0999	0.0527	0.589905363	-0.324055666	shadows
-74.95277677	7.917747287	0.0271	0.027	0.0326	0.0334	0.0508	0.0788	0.0954	0.0851	0.0968	0.1487	0.0823	0.0468	0.43628692	-0.432550044	shadows
-74.9721931	7.905356573	0.0233	0.0218	0.0224	0.0155	0.0291	0.07	0.0914	0.079	0.0931	0.1218	0.0487	0.029	0.671957672	-0.369901547	shadows
-74.99859376	7.910332573	0.0432	0.0375	0.0418	0.0329	0.0523	0.1006	0.1215	0.1107	0.1282	0.1351	0.0928	0.0566	0.54178273	-0.378900446	shadows
-74.94769472	7.928510926	0.0228	0.0215	0.0213	0.0167	0.0291	0.0521	0.0631	0.0519	0.0652	0.1099	0.0443	0.0242	0.513119534	-0.350609756	shadows
-74.94715263	7.910600598	0.021	0.0197	0.0268	0.015	0.0332	0.0807	0.1046	0.0943	0.1098	0.1307	0.0528	0.0265	0.725526075	-0.326633166	shadows
-74.9708323	7.904632832	0.0247	0.0251	0.0267	0.0179	0.0337	0.0687	0.0874	0.0838	0.0883	0.1105	0.0515	0.032	0.647984267	-0.31713555	shadows
-74.91826988	7.607476256	0.033	0.0372	0.0401	0.0293	0.051	0.1015	0.129	0.1164	0.1311	0.1572	0.0827	0.0463	0.597803706	-0.346905537	shadows
-74.99959174	7.909789839	0.04	0.0364	0.0378	0.0292	0.0478	0.0773	0.0968	0.1037	0.1044	0.1364	0.0694	0.0432	0.560571859	-0.294776119	shadows
-74.94823185	7.986221724	0.0154	0.0153	0.0153	0.0103	0.0191	0.0422	0.0551	0.0408	0.0571	0.065	0.0323	0.0167	0.596868885	-0.357142857	shadows
-74.93643517	7.987938735	0.0108	0.0136	0.0138	0.0069	0.0166	0.048	0.0639	0.0626	0.0677	0.0598	0.0336	0.0185	0.801438849	-0.417721519	shadows
-74.95277692	7.916390449	0.023	0.0264	0.0248	0.0268	0.0346	0.0531	0.0655	0.0555	0.0691	0.0793	0.0613	0.0385	0.34872418	-0.423925668	shadows
-74.97745191	7.963791349	0.0169	0.0169	0.0169	0.0109	0.021	0.0552	0.0784	0.0702	0.0819	0.0883	0.0404	0.0225	0.731196054	-0.410122164	shadows
-74.98779689	7.930413603	0.028	0.0293	0.0375	0.032	0.0494	0.0882	0.107	0.105	0.1159	0.1309	0.0797	0.0467	0.532846715	-0.360068259	shadows
-74.93499097	7.939273374	0.0133	0.0134	0.012	0.0111	0.0202	0.0465	0.0647	0.051	0.0681	0.0731	0.0427	0.0259	0.642512077	-0.561243144	shadows
-74.97699828	7.962886767	0.0184	0.0176	0.0193	0.0113	0.0255	0.065	0.0833	0.0835	0.0878	0.0832	0.0436	0.0227	0.761603376	-0.386327504	shadows
-74.96312007	7.912592344	0.0239	0.0251	0.0272	0.0193	0.0347	0.0706	0.0873	0.0825	0.093	0.0979	0.0568	0.0349	0.620825147	-0.352380952	shadows
-74.94823161	7.98812129	0.0243	0.0236	0.0332	0.0277	0.0634	0.1599	0.1987	0.1205	0.2083	0.2097	0.1097	0.0626	0.626180837	-0.535339398	shadows
-74.99895666	7.909428014	0.0407	0.0348	0.037	0.031	0.0507	0.0889	0.1141	0.1103	0.1138	0.1236	0.0831	0.0498	0.561217268	-0.383846794	shadows
-74.95186967	7.91629989	0.0279	0.0307	0.0328	0.0418	0.0482	0.0578	0.0689	0.0655	0.0706	0.0871	0.0734	0.0493	0.220876048	-0.382297552	shadows
-74.97690748	7.963881774	0.025	0.0197	0.0204	0.0133	0.0258	0.0717	0.0975	0.0888	0.1027	0.119	0.0454	0.0245	0.739471107	-0.37993921	shadows
-74.99142598	7.93439375	0.0223	0.023	0.0301	0.0183	0.0465	0.108	0.1273	0.105	0.1358	0.1279	0.0722	0.0379	0.703163017	-0.411534702	shadows
-74.95325905	7.6594038	0.0278	0.0309	0.0362	0.028	0.0456	0.0824	0.1026	0.0993	0.1092	0.1811	0.0719	0.0443	0.560094266	-0.330249769	shadows
-74.99197033	7.936112422	0.024	0.0212	0.0254	0.0148	0.036	0.1031	0.1401	0.1126	0.1543	0.1835	0.0676	0.0345	0.767660911	-0.453763441	shadows
-74.96166832	7.914039508	0.0817	0.0306	0.0364	0.038	0.0597	0.1082	0.1395	0.0893	0.1534	0.2168	0.0994	0.0752	0.402985075	-0.463917526	shadows
-74.99070013	7.934755558	0.0249	0.0245	0.0286	0.0157	0.0348	0.0853	0.1064	0.1074	0.1116	0.122	0.058	0.0306	0.744922827	-0.339491917	shadows
-74.93471882	7.939001964	0.0134	0.0159	0.0151	0.0168	0.0237	0.0324	0.0427	0.0402	0.0473	0.0671	0.0458	0.0334	0.410526316	-0.50410509	shadows
-74.9550371	7.989659831	0.0215	0.0257	0.0296	0.0236	0.0469	0.0893	0.1116	0.0884	0.1169	0.1436	0.0693	0.0364	0.578571429	-0.401415571	shadows
-74.93915709	7.990200532	0.0176	0.0181	0.0271	0.0176	0.0452	0.1303	0.1718	0.14	0.1879	0.2252	0.0848	0.0394	0.776649746	-0.515638963	shadows
-74.93544481	7.93809752	0.0166	0.0153	0.0179	0.0134	0.0239	0.0551	0.0741	0.065	0.0769	0.0676	0.0453	0.0261	0.658163265	-0.433544304	shadows
-74.98707121	7.925257598	0.0256	0.0259	0.0335	0.0223	0.0489	0.1087	0.1355	0.1172	0.1465	0.1819	0.085	0.0451	0.680286738	-0.434599156	shadows
-74.93948371	7.612002592	0.0323	0.035	0.0426	0.0342	0.0564	0.1368	0.1768	0.1699	0.1842	0.2356	0.0982	0.0514	0.664870162	-0.394886364	shadows
-74.9716488	7.904813801	0.0244	0.0244	0.0232	0.0189	0.0296	0.0536	0.069	0.0617	0.0719	0.118	0.0504	0.0339	0.53101737	-0.369565217	shadows
-74.99959174	7.909518471	0.0401	0.0342	0.0384	0.026	0.0514	0.0979	0.1212	0.1193	0.1285	0.1359	0.0857	0.0498	0.642119752	-0.381144239	shadows
-74.94732462	7.98477432	0.0189	0.0185	0.0208	0.0136	0.0274	0.0569	0.0701	0.0642	0.0727	0.1118	0.0448	0.0243	0.650385604	-0.365853659	shadows
-74.95277691	7.916480905	0.0226	0.024	0.0244	0.0267	0.035	0.055	0.0679	0.0616	0.0715	0.0793	0.0613	0.0372	0.395243488	-0.430571762	shadows
-74.93939305	7.612002579	0.0339	0.036	0.0452	0.0354	0.0573	0.1374	0.174	0.167	0.1802	0.2424	0.0992	0.0531	0.650197628	-0.373961219	shadows
-74.90406074	7.899738221	0.013	0.019	0.0232	0.0156	0.033	0.0739	0.0932	0.0858	0.0999	0.095	0.0532	0.0281	0.692307692	-0.392670157	shadows
-74.94605402	7.986492812	0.0221	0.0154	0.0205	0.0151	0.0327	0.0738	0.0959	0.0752	0.1003	0.1174	0.0549	0.03	0.665559247	-0.456233422	shadows
-74.93598161	7.986943654	0.0168	0.0185	0.0214	0.0108	0.03	0.0801	0.105	0.1142	0.1095	0.1736	0.0493	0.0262	0.8272	-0.394625177	shadows
-74.93588978	7.993908715	0.0396	0.031	0.041	0.0346	0.0645	0.1318	0.1581	0.1297	0.1688	0.222	0.0959	0.0476	0.578819233	-0.401022644	shadows
-74.99913811	7.911960781	0.0389	0.0348	0.0403	0.0278	0.0521	0.1103	0.133	0.1276	0.1444	0.1542	0.0821	0.0455	0.642213642	-0.341503268	shadows
-74.93616307	7.987124593	0.0151	0.0174	0.0195	0.0117	0.0238	0.0678	0.0916	0.0943	0.1057	0.126	0.0429	0.0235	0.779245283	-0.375	shadows
-74.94760625	7.910600656	0.0217	0.0217	0.0237	0.0142	0.0303	0.0806	0.1036	0.096	0.1077	0.1129	0.0484	0.0246	0.742286751	-0.34257975	shadows
-74.93933851	7.990652837	0.0203	0.0212	0.0294	0.0151	0.0544	0.1763	0.2445	0.2051	0.2798	0.2834	0.1064	0.0502	0.862851953	-0.567010309	shadows
-74.97755916	7.654430615	0.0321	0.0294	0.0359	0.0243	0.0477	0.1203	0.1538	0.1426	0.1638	0.1712	0.0766	0.0397	0.708807669	-0.361777778	shadows
-74.98571891	7.671165504	0.0353	0.038	0.0524	0.0321	0.0768	0.188	0.234	0.1995	0.2474	0.2356	0.114	0.0516	0.722797927	-0.370192308	shadows
-74.94977438	7.986855103	0.0199	0.0208	0.0269	0.0144	0.0326	0.0734	0.091	0.107	0.0986	0.1489	0.0533	0.026	0.76276771	-0.329177057	shadows
-74.93480948	7.939454257	0.0126	0.0105	0.0128	0.0077	0.0189	0.0508	0.074	0.0662	0.0828	0.0856	0.0407	0.0231	0.791610284	-0.521495327	shadows
-74.98635364	7.670803697	0.0389	0.0377	0.04	0.0285	0.0579	0.1507	0.1967	0.1569	0.21	0.2196	0.0929	0.0466	0.692556634	-0.398043642	shadows
-74.94795955	7.986854878	0.0147	0.017	0.0167	0.0116	0.0217	0.0473	0.0667	0.0589	0.0669	0.0684	0.0355	0.021	0.670921986	-0.360153257	shadows
-74.95489106	7.660037172	0.0305	0.0331	0.0367	0.0277	0.0473	0.0992	0.1227	0.1067	0.1278	0.211	0.0756	0.0422	0.587797619	-0.346393589	shadows
-74.97167424	7.522453093	0.0374	0.0429	0.0483	0.035	0.0612	0.1204	0.1436	0.1405	0.1516	0.233	0.0969	0.0565	0.601139601	-0.334710744	shadows
-74.94842052	7.928782384	0.0244	0.0217	0.0241	0.0178	0.0325	0.0672	0.0851	0.066	0.0952	0.1475	0.0588	0.0318	0.575178998	-0.418576598	shadows
-74.94715262	7.910691054	0.0209	0.0186	0.0233	0.0147	0.0333	0.0799	0.1041	0.0847	0.1111	0.1338	0.0544	0.0269	0.704225352	-0.4002574	shadows
-74.94733409	7.910510165	0.0213	0.0209	0.0245	0.0136	0.03	0.0735	0.0973	0.1032	0.1029	0.1227	0.0495	0.0253	0.767123288	-0.337837838	shadows
-74.91572983	7.615526452	0.0263	0.033	0.0385	0.0263	0.0496	0.1034	0.1271	0.1276	0.1315	0.1793	0.0796	0.0442	0.658219623	-0.348010161	shadows
-74.95168821	7.916390324	0.0301	0.0265	0.0277	0.0325	0.0462	0.0551	0.0665	0.0583	0.0701	0.0942	0.0722	0.0507	0.284140969	-0.445445445	shadows
-74.94724335	7.91060061	0.0211	0.0193	0.0237	0.015	0.031	0.0734	0.097	0.0847	0.1076	0.1272	0.0499	0.0259	0.699097292	-0.355978261	shadows
-74.9484205	7.928872839	0.0251	0.021	0.0246	0.018	0.0414	0.0916	0.1177	0.0715	0.1297	0.1574	0.0755	0.0395	0.597765363	-0.508491508	shadows
-74.90397052	7.89756726	0.0096	0.0149	0.0148	0.0093	0.0199	0.0497	0.0671	0.0619	0.0702	0.0763	0.0378	0.0209	0.738764045	-0.437262357	shadows
-75.00013609	7.912865341	0.0157	0.0311	0.0353	0.0249	0.0251	0.0563	0.0715	0.1382	0.0764	0.0866	0.0426	0.0246	0.694665849	-0.093709884	shadows
-74.97173953	7.904632895	0.0255	0.0269	0.0263	0.0232	0.031	0.0658	0.0808	0.0728	0.0845	0.1363	0.0527	0.0336	0.516666667	-0.334177215	shadows
-74.93942927	7.990562394	0.0203	0.018	0.0234	0.0131	0.0504	0.1688	0.245	0.1489	0.2794	0.2678	0.1042	0.0515	0.838271605	-0.63322884	shadows
-74.94696158	7.985317007	0.0148	0.0145	0.0191	0.0136	0.0245	0.0518	0.0645	0.0614	0.0677	0.062	0.0422	0.0228	0.637333333	-0.376835237	shadows
-74.95476496	7.988936157	0.019	0.0229	0.0303	0.02	0.0405	0.0918	0.1139	0.1114	0.116	0.127	0.0615	0.0291	0.695585997	-0.339869281	shadows
-74.99795871	7.906262053	0.0425	0.0365	0.0456	0.034	0.0583	0.1165	0.1454	0.139	0.1535	0.1536	0.1004	0.0569	0.606936416	-0.375342466	shadows
-74.94878348	7.928420605	0.0249	0.0259	0.03	0.0251	0.0385	0.0668	0.0778	0.0815	0.0821	0.133	0.0624	0.0347	0.529080675	-0.350649351	shadows
-74.95214193	7.915576274	0.0274	0.0298	0.0341	0.0343	0.0436	0.0675	0.0764	0.0705	0.079	0.0991	0.071	0.0392	0.345419847	-0.351094196	shadows
-74.97001572	7.905537334	0.0244	0.0268	0.0286	0.0238	0.0363	0.0671	0.0868	0.0789	0.0912	0.1092	0.0579	0.035	0.536514119	-0.338728324	shadows
-74.99060939	7.935479203	0.0279	0.0309	0.0361	0.0227	0.047	0.1147	0.1377	0.1381	0.1457	0.1425	0.0796	0.0433	0.717661692	-0.375972342	shadows
-74.98661755	7.925800318	0.0289	0.0261	0.034	0.0265	0.0765	0.1691	0.2157	0.1211	0.2422	0.2193	0.1361	0.0758	0.640921409	-0.600235156	shadows
-74.93444654	7.939544656	0.0164	0.0105	0.0127	0.0081	0.0186	0.0537	0.0774	0.062	0.0841	0.0962	0.0407	0.0231	0.768901569	-0.524344569	shadows
-74.95359312	7.91946604	0.0272	0.021	0.0367	0.0176	0.054	0.1512	0.1994	0.1645	0.2284	0.2573	0.0923	0.0474	0.806699616	-0.431007752	shadows
-74.99804942	7.90743798	0.0924	0.0404	0.0451	0.045	0.0618	0.1101	0.136	0.1205	0.1538	0.1892	0.1113	0.0768	0.456193353	-0.423273657	shadows
-74.93517272	7.937464287	0.0188	0.0216	0.0196	0.0222	0.0285	0.0401	0.0506	0.0444	0.0535	0.0723	0.0558	0.0379	0.333333333	-0.480106101	shadows
-74.9877969	7.930142236	0.03	0.0339	0.0392	0.0353	0.051	0.0939	0.114	0.1078	0.1209	0.1374	0.081	0.0469	0.506638714	-0.347753744	shadows
-74.9522616	7.660036889	0.0297	0.0327	0.0379	0.0305	0.0512	0.0888	0.1096	0.101	0.1132	0.1731	0.0771	0.0476	0.536121673	-0.340869565	shadows
-74.97755924	7.652983303	0.0356	0.0319	0.0383	0.0269	0.0545	0.1474	0.202	0.1364	0.2204	0.2286	0.0957	0.0519	0.670545009	-0.428358209	shadows
-74.90415194	7.897657757	0.0099	0.0131	0.0151	0.0105	0.0207	0.0524	0.0676	0.0619	0.0741	0.0762	0.0391	0.0209	0.709944751	-0.442804428	shadows
-74.98626296	7.670803694	0.0387	0.0346	0.0405	0.0285	0.0542	0.1377	0.1774	0.1502	0.1892	0.204	0.0864	0.0441	0.681029659	-0.361702128	shadows
-74.93570913	7.988571811	0.0122	0.0159	0.014	0.0087	0.0176	0.0495	0.0676	0.0684	0.0706	0.0656	0.0348	0.0185	0.774319066	-0.426229508	shadows
-74.98743395	7.930956327	0.0404	0.0311	0.0383	0.0334	0.0543	0.109	0.1367	0.1067	0.1453	0.2007	0.0885	0.0509	0.523197716	-0.395899054	shadows
-74.94686994	7.992282073	0.0335	0.0367	0.0375	0.0272	0.0462	0.1163	0.1498	0.1403	0.1627	0.2783	0.087	0.0421	0.675223881	-0.397590361	shadows
-74.99142598	7.934755574	0.021	0.0209	0.0287	0.0149	0.0385	0.0881	0.1115	0.1198	0.1137	0.1234	0.0565	0.0306	0.778767632	-0.32629108	shadows
-74.97110445	7.904813763	0.0246	0.0276	0.0275	0.0261	0.0333	0.0471	0.0586	0.0505	0.0623	0.1065	0.055	0.037	0.318537859	-0.333333333	shadows
-74.95558158	7.989478978	0.0219	0.0262	0.0283	0.0208	0.0394	0.0882	0.1136	0.0942	0.1158	0.1656	0.0663	0.0317	0.63826087	-0.401691332	shadows
-74.93480985	7.937102408	0.0181	0.0246	0.0222	0.0208	0.0274	0.0443	0.0579	0.0668	0.0626	0.0859	0.0567	0.0365	0.525114155	-0.437262357	shadows
-74.95214178	7.916933112	0.0264	0.0303	0.035	0.0363	0.0561	0.0845	0.1	0.0888	0.1037	0.0968	0.0886	0.0504	0.419664269	-0.433656958	shadows
-74.99904738	7.91196078	0.039	0.0348	0.043	0.0301	0.0563	0.1161	0.141	0.1319	0.1521	0.1612	0.0875	0.0478	0.628395062	-0.340996169	shadows
-74.99786799	7.905538405	0.0432	0.0368	0.0443	0.0328	0.0557	0.1104	0.1368	0.1283	0.1471	0.151	0.0892	0.052	0.592799503	-0.336329588	shadows
-74.95244302	7.659313253	0.0286	0.0352	0.0397	0.037	0.0492	0.0875	0.106	0.1001	0.1124	0.1842	0.0758	0.0474	0.460247994	-0.312554113	shadows
-74.99850305	7.907890262	0.0749	0.038	0.0473	0.0361	0.0544	0.1038	0.13	0.1196	0.1372	0.168	0.0923	0.0549	0.536287733	-0.32234957	shadows
-74.98625469	7.924353013	0.018	0.0167	0.0194	0.0111	0.0273	0.0762	0.1053	0.0955	0.1115	0.1151	0.0512	0.0257	0.791744841	-0.450424929	shadows
-74.93888496	7.989567303	0.0123	0.0117	0.0157	0.0072	0.024	0.0689	0.0944	0.0804	0.1047	0.1263	0.0495	0.0227	0.835616438	-0.518404908	shadows
-74.99151671	7.934393752	0.0223	0.0239	0.0316	0.0216	0.0481	0.1074	0.1249	0.1104	0.136	0.1272	0.072	0.037	0.672727273	-0.38996139	shadows
-74.93552782	7.987486316	0.0144	0.0149	0.016	0.0112	0.026	0.0659	0.0883	0.0693	0.0944	0.0915	0.0452	0.0257	0.72173913	-0.477124183	shadows
-74.97826627	8.006757801	0.0206	0.0202	0.0232	0.016	0.0263	0.0454	0.0582	0.0521	0.0568	0.0589	0.0386	0.0241	0.53010279	-0.249190939	shadows
-74.97853856	8.005853261	0.0224	0.0252	0.0249	0.019	0.0289	0.0473	0.0577	0.0517	0.0602	0.0648	0.0387	0.0241	0.46251768	-0.216981132	shadows
-74.90251935	7.895938719	0.025	0.0658	0.0741	0.0746	0.0651	0.0903	0.1057	0.106	0.1077	0.1261	0.0805	0.0473	0.173864895	-0.041397154	shadows
-74.93906637	7.990110063	0.0166	0.0167	0.0261	0.0135	0.0416	0.1172	0.1597	0.1549	0.1696	0.2117	0.0757	0.0367	0.839667458	-0.487229862	shadows
-74.93426512	7.93927326	0.0161	0.0098	0.0138	0.0068	0.0188	0.0557	0.0823	0.0703	0.0864	0.0937	0.0403	0.0225	0.823605707	-0.489833641	shadows
-74.98770616	7.930232689	0.0292	0.0301	0.0377	0.0291	0.0485	0.0885	0.1072	0.1056	0.1188	0.139	0.0758	0.0447	0.567928731	-0.335682819	shadows
-74.93679791	7.989386079	0.0217	0.013	0.015	0.0089	0.0196	0.055	0.0759	0.0692	0.0828	0.0873	0.0389	0.0207	0.772087068	-0.443413729	shadows
-74.97583648	7.653525952	0.0321	0.0325	0.041	0.028	0.0555	0.138	0.1704	0.1788	0.1794	0.1851	0.0964	0.0468	0.729206963	-0.403202329	shadows
-74.97083226	7.905175568	0.0237	0.0241	0.0239	0.0179	0.0293	0.0632	0.081	0.0686	0.0831	0.104	0.052	0.0335	0.586127168	-0.370223979	shadows
-74.90251933	7.896029175	0.0236	0.0549	0.0652	0.0698	0.0565	0.0841	0.1013	0.1092	0.1005	0.1243	0.0722	0.0411	0.220111732	-0.050946143	shadows
-74.92937131	7.905894264	0.0275	0.0267	0.0311	0.0302	0.0365	0.0454	0.0546	0.052	0.0572	0.1098	0.0379	0.0208	0.265206813	-0.098550725	shadows
-74.91609258	7.61498378	0.0264	0.0314	0.0379	0.0259	0.0502	0.1149	0.14	0.1361	0.1473	0.17	0.0804	0.0437	0.680246914	-0.359256128	shadows
-74.97935525	8.00630558	0.0261	0.0209	0.0242	0.0183	0.0294	0.0489	0.0612	0.0449	0.0614	0.0677	0.0398	0.0248	0.420886076	-0.24375	shadows
-74.93508196	7.937645185	0.0185	0.0216	0.0195	0.0216	0.0269	0.0358	0.0472	0.0416	0.0487	0.0603	0.0571	0.0407	0.316455696	-0.490861619	shadows
-74.94614477	7.986402368	0.0192	0.0132	0.0165	0.0144	0.025	0.0575	0.0714	0.038	0.0748	0.1025	0.0432	0.0237	0.450381679	-0.447236181	shadows
-74.95095156	8.007479103	0.0228	0.0247	0.0312	0.0247	0.0522	0.1016	0.1289	0.0927	0.1393	0.1685	0.0893	0.048	0.579216354	-0.482157676	shadows
-74.93984628	7.612545385	0.034	0.0349	0.0439	0.0301	0.0573	0.1384	0.1728	0.1583	0.1793	0.2589	0.0965	0.0515	0.680467091	-0.374643875	shadows
-74.95168828	7.915757133	0.0269	0.0267	0.028	0.0285	0.0424	0.0606	0.0734	0.0661	0.073	0.0922	0.0678	0.0445	0.397463002	-0.415448852	shadows
-74.93471876	7.939363787	0.0121	0.0114	0.012	0.0083	0.0182	0.0466	0.0677	0.0695	0.0754	0.08	0.0386	0.023	0.786632391	-0.5256917	shadows
-74.97708908	7.961620392	0.02	0.0225	0.0251	0.0129	0.0305	0.0818	0.1051	0.1162	0.1086	0.1072	0.0494	0.0257	0.800154919	-0.326174497	shadows
-74.96357369	7.91268284	0.0221	0.0264	0.0292	0.0209	0.0361	0.0709	0.0869	0.084	0.0911	0.094	0.0581	0.0325	0.601525262	-0.331042383	shadows
-74.94024623	7.988662947	0.0205	0.0181	0.029	0.0177	0.0592	0.1974	0.27	0.1701	0.3036	0.2969	0.1124	0.0532	0.811501597	-0.589816124	shadows
-74.98688982	7.923358019	0.0202	0.0208	0.0238	0.0132	0.0294	0.077	0.1061	0.101	0.1166	0.1426	0.0515	0.0263	0.76882662	-0.367861886	shadows
-74.99814015	7.906171598	0.0431	0.0381	0.0461	0.0362	0.0583	0.1193	0.1494	0.1383	0.1593	0.1591	0.1015	0.0561	0.585100287	-0.375338753	shadows
-74.99877522	7.907528439	0.0431	0.0395	0.0449	0.0364	0.055	0.1046	0.132	0.1231	0.1392	0.1462	0.0971	0.0553	0.543573668	-0.367605634	shadows
-74.94470419	7.90200697	0.0288	0.0264	0.03	0.0202	0.0442	0.1026	0.1282	0.1141	0.1449	0.226	0.0796	0.0393	0.699180938	-0.452554745	shadows
-74.95040701	8.008112226	0.0217	0.0244	0.0391	0.0216	0.0548	0.1333	0.1688	0.1726	0.179	0.1694	0.0889	0.04	0.777548919	-0.3890625	shadows
-74.91409779	7.616159331	0.0308	0.0325	0.0404	0.029	0.0551	0.1191	0.1466	0.1426	0.1529	0.2155	0.0875	0.0495	0.662004662	-0.36825645	shadows
-74.93670737	7.988119687	0.0099	0.0117	0.0132	0.007	0.0151	0.0449	0.0623	0.0647	0.0642	0.0574	0.0323	0.0193	0.80474198	-0.41978022	shadows
-74.91681913	7.608471008	0.0296	0.0358	0.0384	0.0315	0.049	0.0928	0.1148	0.1027	0.1171	0.1248	0.0842	0.0495	0.530551416	-0.373572594	shadows
-74.95226159	7.660127346	0.0299	0.0324	0.0377	0.0294	0.0499	0.09	0.1118	0.1065	0.1163	0.1691	0.0763	0.0467	0.567328918	-0.338596491	shadows
-74.97056008	7.905266005	0.0238	0.0238	0.025	0.0159	0.0306	0.0682	0.0941	0.084	0.0941	0.1088	0.0489	0.0303	0.681681682	-0.323410014	shadows
-74.98635363	7.671075068	0.0381	0.0354	0.0415	0.0284	0.0585	0.1485	0.1949	0.169	0.2095	0.2315	0.095	0.0457	0.712259372	-0.391941392	shadows
-74.93453764	7.937192821	0.0164	0.0199	0.0177	0.0166	0.0248	0.0384	0.0509	0.0495	0.0571	0.0823	0.0475	0.0314	0.497730711	-0.457055215	shadows
-74.97835704	8.006215073	0.0209	0.0208	0.0235	0.0155	0.0274	0.0513	0.0646	0.0622	0.0663	0.0593	0.0386	0.0232	0.601029601	-0.2431562	shadows
-74.98770633	7.924714882	0.0249	0.0262	0.0365	0.0195	0.0537	0.1524	0.2071	0.2013	0.2247	0.251	0.092	0.0458	0.823369565	-0.431906615	shadows
-74.93417442	7.939092334	0.0155	0.0101	0.0118	0.0077	0.0184	0.0562	0.0839	0.0735	0.0867	0.0946	0.0409	0.0224	0.810344828	-0.552182163	shadows
-74.95603528	7.989569482	0.0243	0.0234	0.0264	0.0194	0.042	0.1023	0.1352	0.0877	0.1353	0.2254	0.0767	0.0409	0.637721755	-0.487875849	shadows
-74.98734322	7.930956325	0.0424	0.029	0.0356	0.0281	0.0577	0.1163	0.1485	0.1186	0.1565	0.2081	0.0925	0.0545	0.616905249	-0.444184231	shadows
-74.99841232	7.907618894	0.0734	0.0362	0.0419	0.0307	0.0507	0.1022	0.132	0.1262	0.1395	0.1633	0.0897	0.0513	0.608667941	-0.363221884	shadows
-74.98797836	7.930142241	0.0304	0.0278	0.0344	0.0274	0.0546	0.0946	0.1126	0.1115	0.1201	0.1381	0.0857	0.05	0.605471562	-0.427144047	shadows
-74.93426518	7.938911437	0.0131	0.0106	0.0126	0.0084	0.0169	0.051	0.0715	0.0683	0.0774	0.0839	0.039	0.0234	0.780964798	-0.511627907	shadows
-74.98608157	7.672160543	0.0352	0.0323	0.0383	0.0263	0.0487	0.1178	0.1567	0.154	0.1618	0.1812	0.0797	0.043	0.708264004	-0.350847458	shadows
-74.93661657	7.988481496	0.01	0.0121	0.0117	0.0073	0.015	0.042	0.0632	0.059	0.0678	0.0594	0.033	0.0175	0.779788839	-0.476510067	shadows
-74.94860201	7.928511039	0.0232	0.0263	0.0307	0.0261	0.0373	0.0656	0.0784	0.0799	0.0842	0.1221	0.0602	0.0351	0.50754717	-0.324532453	shadows
-74.952715	7.659584654	0.0282	0.0354	0.038	0.0314	0.046	0.0778	0.0955	0.092	0.1025	0.1836	0.0755	0.0477	0.4910859	-0.330396476	shadows
-74.97953885	7.963972368	0.0239	0.0187	0.0205	0.0127	0.0256	0.08	0.1109	0.093	0.1201	0.1957	0.0524	0.0287	0.759697256	-0.437585734	shadows
-74.95286764	7.916480915	0.0221	0.0219	0.0239	0.0216	0.0345	0.0564	0.0702	0.0659	0.0739	0.079	0.0599	0.0359	0.506285714	-0.429594272	shadows
-74.99206108	7.935117409	0.022	0.0214	0.0314	0.0161	0.038	0.0999	0.1311	0.1246	0.1318	0.1631	0.0588	0.0293	0.771144279	-0.303769401	shadows
-74.93462025	7.988390729	0.0134	0.0127	0.0172	0.0108	0.0229	0.0678	0.0928	0.0863	0.0951	0.1192	0.0426	0.0208	0.777548919	-0.424749164	shadows
-74.90406124	7.897567281	0.0095	0.0155	0.0148	0.0086	0.0205	0.0509	0.0672	0.062	0.0724	0.0757	0.0378	0.0209	0.756373938	-0.437262357	shadows
-74.90866594	7.997702724	0.0217	0.0199	0.0291	0.0175	0.0503	0.1402	0.1873	0.1277	0.2075	0.2747	0.0904	0.0437	0.758953168	-0.512970711	shadows
-74.97128589	7.904994688	0.0237	0.0249	0.0253	0.0185	0.0309	0.0581	0.0739	0.0724	0.0787	0.1015	0.0498	0.032	0.592959296	-0.326231691	shadows
-74.97781491	7.962886811	0.0204	0.0214	0.0208	0.0205	0.0276	0.0492	0.0623	0.0463	0.0646	0.0795	0.0506	0.0324	0.386227545	-0.417366947	shadows
-74.93993698	7.612274026	0.0337	0.0362	0.0445	0.0283	0.0618	0.1467	0.1791	0.1699	0.1887	0.2539	0.1008	0.052	0.714429869	-0.387474191	shadows
-74.94678003	7.985859717	0.0134	0.0163	0.0184	0.0123	0.0235	0.0489	0.0621	0.0558	0.0635	0.0561	0.0426	0.0244	0.63876652	-0.396721311	shadows
-74.94832264	7.985859913	0.0172	0.0171	0.0208	0.0131	0.025	0.0539	0.0664	0.0663	0.0668	0.1017	0.0368	0.0196	0.670025189	-0.277777778	shadows
-74.94886701	7.986493169	0.0167	0.0169	0.0196	0.012	0.0251	0.0576	0.0693	0.0704	0.0731	0.0865	0.0403	0.0222	0.708737864	-0.34557596	shadows
-74.99950101	7.909789839	0.0414	0.0375	0.0389	0.0332	0.0468	0.074	0.0901	0.0764	0.0972	0.1331	0.0654	0.0425	0.394160584	-0.254074784	shadows
-74.95498172	7.660127639	0.0309	0.0312	0.0362	0.0274	0.0479	0.103	0.1274	0.1178	0.1348	0.2139	0.0761	0.0421	0.622589532	-0.355298308	shadows
-74.98644423	7.673246037	0.0402	0.0352	0.0445	0.0308	0.0677	0.1766	0.23	0.1775	0.2452	0.2817	0.1118	0.056	0.704272684	-0.430582214	shadows
-74.95295837	7.916480925	0.0217	0.0216	0.0234	0.0198	0.0335	0.0569	0.0716	0.0674	0.0746	0.0787	0.0583	0.0345	0.54587156	-0.427172583	shadows
-74.91645511	7.615617049	0.0282	0.0357	0.043	0.0299	0.0552	0.1261	0.1547	0.1515	0.1628	0.2025	0.0877	0.0437	0.670341786	-0.342004591	shadows
-74.93834047	7.989838589	0.0127	0.0149	0.0131	0.0074	0.0202	0.0615	0.0855	0.0728	0.0936	0.1151	0.0448	0.0216	0.815461347	-0.547495682	shadows
-74.99904739	7.908613911	0.049	0.0374	0.0426	0.0331	0.0547	0.1113	0.1382	0.1238	0.1458	0.149	0.093	0.0547	0.578075207	-0.371681416	shadows
-74.98707105	7.930504037	0.0302	0.0324	0.042	0.0393	0.0666	0.1227	0.1515	0.1149	0.1624	0.1451	0.1037	0.0578	0.490272374	-0.423472889	shadows
-74.98698056	7.922905742	0.0233	0.0256	0.03	0.0163	0.0397	0.1124	0.1484	0.1508	0.1638	0.2169	0.0678	0.0309	0.804907241	-0.386503067	shadows
-74.96311996	7.913768271	0.0228	0.0246	0.0297	0.0219	0.0412	0.0802	0.0993	0.0878	0.1071	0.1266	0.0683	0.0386	0.600729262	-0.393877551	shadows
-74.94832263	7.985950368	0.0163	0.0164	0.02	0.0115	0.0241	0.0484	0.0608	0.0645	0.0668	0.0805	0.0337	0.0183	0.697368421	-0.255121043	shadows
-74.99741437	7.905447946	0.0465	0.0428	0.0499	0.047	0.0663	0.1208	0.1467	0.1299	0.1562	0.1792	0.1101	0.0635	0.468626343	-0.37625	shadows
-74.99850304	7.910332572	0.0455	0.0372	0.0411	0.0318	0.0539	0.1035	0.1261	0.1176	0.1328	0.1393	0.0926	0.056	0.574297189	-0.385190726	shadows
-74.97592721	7.65253093	0.0332	0.0346	0.0433	0.0288	0.0535	0.125	0.1548	0.1586	0.1657	0.1746	0.0824	0.0441	0.692636073	-0.311058075	shadows
-74.99931956	7.912051237	0.0385	0.0314	0.0365	0.0251	0.0458	0.1024	0.1304	0.1211	0.1373	0.1413	0.0749	0.0411	0.656634747	-0.34470377	shadows
-74.98843201	7.92978043	0.0347	0.0307	0.0411	0.0346	0.0726	0.1246	0.1471	0.1303	0.1522	0.1711	0.11	0.0617	0.580351728	-0.455989411	shadows
-74.9400647	7.988934287	0.0205	0.0187	0.02	0.012	0.041	0.1301	0.1882	0.1074	0.2097	0.2825	0.079	0.0405	0.798994975	-0.595959596	shadows
-74.93462027	7.988300274	0.0139	0.0165	0.0179	0.009	0.0227	0.0654	0.0905	0.0912	0.093	0.1238	0.0408	0.0215	0.820359281	-0.39011925	shadows
-74.97119506	7.906532432	0.0331	0.0395	0.0484	0.0424	0.0562	0.0822	0.1014	0.1017	0.1026	0.1267	0.0801	0.049	0.411519778	-0.246692607	shadows
-74.95289637	7.659313303	0.0282	0.0301	0.0373	0.0283	0.0456	0.0876	0.1075	0.103	0.1109	0.1833	0.071	0.0448	0.568926123	-0.311172669	shadows
-74.95271501	7.659494197	0.0283	0.0324	0.0374	0.0306	0.0459	0.0812	0.0972	0.0923	0.104	0.1836	0.0745	0.0469	0.502034174	-0.331546023	shadows
-74.93471872	7.939635154	0.0127	0.0112	0.0119	0.0081	0.0203	0.0566	0.0782	0.0704	0.0828	0.0938	0.0423	0.0235	0.793630573	-0.560885609	shadows
-74.99777726	7.905719316	0.0427	0.036	0.0413	0.0316	0.0552	0.1076	0.1338	0.1225	0.1428	0.1488	0.0932	0.0539	0.589876703	-0.385873606	shadows
-74.95289629	7.660036959	0.0274	0.0309	0.0361	0.0298	0.0452	0.0914	0.1147	0.1025	0.122	0.1689	0.0718	0.0444	0.549508692	-0.330861909	shadows
-74.93453753	7.937916467	0.0154	0.0175	0.0151	0.016	0.0224	0.0319	0.0363	0.0386	0.0413	0.0556	0.0482	0.0355	0.413919414	-0.522906793	shadows
-74.94733408	7.910600621	0.0213	0.0187	0.0221	0.0137	0.03	0.0731	0.0986	0.089	0.1047	0.1236	0.05	0.0252	0.733203505	-0.386962552	shadows
-74.99197035	7.935207864	0.0215	0.022	0.0287	0.0152	0.0379	0.0943	0.1215	0.1144	0.123	0.1466	0.0574	0.0291	0.765432099	-0.333333333	shadows
-74.95208023	7.660217783	0.0315	0.0354	0.0383	0.033	0.0517	0.0907	0.1081	0.0995	0.1159	0.1756	0.0806	0.0497	0.501886792	-0.355761144	shadows
-74.97872218	7.964605517	0.017	0.0149	0.0175	0.0095	0.0233	0.0684	0.0913	0.0913	0.0982	0.1148	0.0447	0.0228	0.811507937	-0.437299035	shadows
-75.00004536	7.912865341	0.021	0.0311	0.0338	0.0232	0.0503	0.1127	0.1431	0.1414	0.1528	0.1154	0.0853	0.0493	0.718104496	-0.43240974	shadows
-74.98625471	7.923810278	0.0172	0.0196	0.023	0.012	0.0267	0.0754	0.1004	0.0963	0.1007	0.1059	0.0483	0.0261	0.778393352	-0.35483871	shadows
-74.93598893	7.939816263	0.0182	0.0199	0.0271	0.0163	0.0372	0.0797	0.1002	0.0919	0.1056	0.1009	0.0595	0.0355	0.6987061	-0.374133949	shadows
-74.93462797	7.939725596	0.0127	0.0104	0.015	0.0082	0.0206	0.0588	0.0834	0.0758	0.0886	0.0949	0.0425	0.024	0.804761905	-0.47826087	shadows
-74.90442415	7.897476908	0.0108	0.0155	0.0148	0.0112	0.0217	0.056	0.0684	0.0649	0.0731	0.0783	0.0402	0.0211	0.70565046	-0.461818182	shadows
-74.95298696	7.660127426	0.0271	0.0334	0.0379	0.0292	0.0479	0.1034	0.1329	0.1101	0.1404	0.166	0.0762	0.0443	0.580760948	-0.335670465	shadows
-74.93879447	7.987848635	0.0164	0.0176	0.0228	0.0129	0.0344	0.1007	0.1336	0.1166	0.1393	0.1661	0.0615	0.0261	0.800772201	-0.459074733	shadows
-74.94814101	7.987035812	0.0146	0.0171	0.017	0.0104	0.0243	0.0576	0.0724	0.0666	0.0727	0.072	0.0424	0.0216	0.72987013	-0.427609428	shadows
-74.99986391	7.912593973	0.0301	0.0331	0.036	0.025	0.0454	0.1064	0.137	0.1273	0.1433	0.1445	0.0822	0.045	0.671700591	-0.390862944	shadows
-74.96321068	7.913858735	0.0265	0.0256	0.0333	0.0228	0.0437	0.0924	0.1146	0.101	0.1222	0.148	0.0738	0.0386	0.631663974	-0.378151261	shadows
-74.94923002	7.986131392	0.0209	0.0234	0.0329	0.0216	0.0573	0.1348	0.1691	0.1477	0.1903	0.2039	0.0903	0.0434	0.74483166	-0.465909091	shadows
-74.90360793	7.896300794	0.0105	0.014	0.0154	0.0101	0.0217	0.0539	0.073	0.0645	0.0777	0.0786	0.0396	0.0201	0.72922252	-0.44	shadows
-74.96175904	7.914129972	0.0945	0.034	0.0431	0.0417	0.0701	0.1262	0.1647	0.1046	0.1843	0.2396	0.118	0.0989	0.429938483	-0.464928616	shadows
-74.97194616	7.522634025	0.0363	0.0444	0.0464	0.0453	0.0634	0.1063	0.13	0.1196	0.1321	0.2323	0.0983	0.058	0.450576107	-0.358673117	shadows
-74.95485562	7.989659811	0.0211	0.0244	0.0289	0.0218	0.0453	0.0893	0.1112	0.0971	0.1138	0.129	0.0688	0.0348	0.633305299	-0.40839304	shadows
-74.98652684	7.925348036	0.025	0.0283	0.0419	0.0216	0.051	0.1047	0.1254	0.1754	0.1314	0.1614	0.0775	0.0397	0.78071066	-0.298157454	shadows
-74.92937122	7.906436999	0.0302	0.029	0.0375	0.0286	0.0513	0.0968	0.1171	0.1101	0.1301	0.164	0.0825	0.0398	0.587599135	-0.375	shadows
-74.97862931	8.00576281	0.0229	0.0238	0.0247	0.018	0.028	0.0488	0.0602	0.0543	0.0615	0.067	0.0383	0.0233	0.502074689	-0.215873016	shadows
-74.98943005	7.929328178	0.0403	0.0401	0.0524	0.0505	0.0733	0.1224	0.1435	0.137	0.1491	0.177	0.1149	0.0631	0.461333333	-0.373580395	shadows
-74.93634412	7.989928742	0.0755	0.0156	0.0192	0.0153	0.0441	0.1177	0.1724	0.0957	0.1904	0.2129	0.0999	0.0899	0.724324324	-0.677581864	shadows
-74.99832161	7.905176583	0.0451	0.0369	0.0417	0.0327	0.0553	0.1146	0.1458	0.133	0.1537	0.1579	0.0881	0.0501	0.605310803	-0.357473035	shadows
-74.94977437	7.986945558	0.019	0.0193	0.0221	0.0129	0.0304	0.0699	0.0888	0.0847	0.0932	0.1235	0.0506	0.0257	0.735655738	-0.392022008	shadows
-74.97690751	7.96333904	0.0178	0.0156	0.0186	0.0119	0.0227	0.0596	0.0839	0.0784	0.0886	0.0928	0.0413	0.0226	0.736434109	-0.378964942	shadows
-74.97249003	7.522453145	0.0373	0.0454	0.0595	0.0398	0.0769	0.1617	0.1931	0.1863	0.2029	0.2679	0.1213	0.0633	0.647943388	-0.341814159	shadows
-74.93670738	7.988029232	0.0101	0.0129	0.0139	0.0077	0.0158	0.0468	0.063	0.0653	0.0665	0.0591	0.0331	0.019	0.789041096	-0.408510638	shadows
-74.93984629	7.612454928	0.0338	0.0371	0.0481	0.0298	0.058	0.1372	0.1691	0.1634	0.1767	0.2568	0.0966	0.0512	0.691511387	-0.335176227	shadows
-74.99941029	7.910694398	0.0403	0.0333	0.0394	0.0304	0.0487	0.095	0.1167	0.1125	0.1253	0.1346	0.0857	0.05	0.574527642	-0.370103917	shadows
-74.98661741	7.930142199	0.0329	0.035	0.0456	0.037	0.0633	0.1114	0.1363	0.1241	0.1423	0.1598	0.0965	0.0535	0.540657976	-0.358198452	shadows
-74.95494636	7.989659821	0.0213	0.0244	0.0284	0.0208	0.0461	0.0893	0.1114	0.0928	0.1153	0.1363	0.069	0.0356	0.633802817	-0.416837782	shadows
-74.99913811	7.908975735	0.0467	0.0374	0.0439	0.0324	0.055	0.1114	0.1381	0.1358	0.1458	0.1407	0.092	0.0533	0.614744352	-0.353936718	shadows
-74.99814015	7.907528437	0.0919	0.0401	0.0466	0.0405	0.0644	0.1181	0.1512	0.1218	0.167	0.1841	0.1167	0.0818	0.500924214	-0.42927128	shadows
-74.99904738	7.912503516	0.043	0.0319	0.0372	0.0236	0.0499	0.1258	0.1658	0.1523	0.1743	0.1928	0.0829	0.0461	0.731665719	-0.380516236	shadows
-74.99859377	7.907799806	0.0637	0.0388	0.0441	0.0369	0.053	0.1014	0.1272	0.116	0.1364	0.158	0.0929	0.0531	0.517331589	-0.35620438	shadows
-74.91736315	7.608199741	0.0286	0.03	0.0349	0.0289	0.0433	0.0864	0.1002	0.0958	0.1069	0.1214	0.0806	0.0489	0.53648757	-0.395670996	shadows
-74.95208019	7.660579611	0.0407	0.0398	0.0425	0.0408	0.0569	0.0942	0.1129	0.1052	0.1176	0.1815	0.0851	0.0542	0.44109589	-0.333855799	shadows
-74.90424267	7.897657778	0.0102	0.0144	0.0172	0.0097	0.0211	0.0554	0.0712	0.0656	0.0763	0.0767	0.0401	0.0209	0.742363878	-0.39965096	shadows
-74.98652684	7.925438492	0.0255	0.0254	0.035	0.0184	0.0475	0.1002	0.1227	0.1306	0.1304	0.1672	0.0757	0.0392	0.753020134	-0.367660343	shadows
-74.97228385	7.905085211	0.0252	0.0222	0.0239	0.0156	0.0285	0.0726	0.096	0.0867	0.0977	0.1283	0.05	0.029	0.695014663	-0.353179973	shadows
-74.97863146	7.964334145	0.0158	0.015	0.0155	0.009	0.0204	0.0613	0.0862	0.0743	0.0916	0.0939	0.0411	0.0218	0.783913565	-0.45229682	shadows
-74.93508193	7.937826096	0.0182	0.0216	0.02	0.023	0.0263	0.0341	0.0421	0.0408	0.0455	0.0586	0.0572	0.04	0.278996865	-0.481865285	shadows
-74.99904738	7.912051236	0.039	0.0346	0.0446	0.0296	0.0563	0.1173	0.1441	0.1394	0.1542	0.1636	0.0871	0.0468	0.649704142	-0.322703113	shadows
-74.93435592	7.938820996	0.0126	0.0124	0.0124	0.0089	0.0169	0.0418	0.0592	0.0591	0.0635	0.0753	0.0383	0.0248	0.738235294	-0.510848126	shadows
-74.95086084	8.007298181	0.0205	0.0236	0.0308	0.0249	0.0454	0.0837	0.1087	0.098	0.1156	0.1425	0.0738	0.0382	0.594792514	-0.411089866	shadows
-74.93625381	7.987124607	0.0151	0.016	0.0214	0.0113	0.0309	0.0935	0.1247	0.0963	0.1354	0.1354	0.0557	0.0285	0.789962825	-0.444876783	shadows
-74.99832161	7.905267039	0.0447	0.0364	0.0397	0.0288	0.0526	0.1146	0.1465	0.1378	0.1583	0.1575	0.0833	0.0481	0.654261705	-0.354471545	shadows
-74.95214174	7.91720448	0.0264	0.0325	0.0384	0.0359	0.0612	0.0979	0.111	0.1032	0.1194	0.1185	0.0993	0.0548	0.483824587	-0.442265795	shadows
-74.9639366	7.912592415	0.0223	0.0267	0.0284	0.0241	0.035	0.0684	0.083	0.0801	0.0871	0.0971	0.0586	0.0331	0.537428023	-0.347126437	shadows
-74.95307783	7.658227839	0.0327	0.0366	0.0385	0.0313	0.0494	0.0943	0.1191	0.1062	0.1239	0.2168	0.0747	0.0449	0.544727273	-0.319787986	shadows
-74.99814015	7.907347525	0.0735	0.0358	0.0439	0.0356	0.0556	0.1033	0.1293	0.1238	0.1405	0.1626	0.0988	0.0612	0.553324969	-0.384723196	shadows
-74.93888504	7.98902457	0.012	0.0141	0.0168	0.0096	0.0211	0.0609	0.0887	0.0825	0.0918	0.1061	0.0454	0.0199	0.791530945	-0.459807074	shadows
-74.96166833	7.913949052	0.0675	0.031	0.035	0.0321	0.0501	0.0916	0.1199	0.0913	0.132	0.1913	0.0825	0.0593	0.479740681	-0.404255319	shadows
-74.99904739	7.910784853	0.0398	0.0342	0.0405	0.0322	0.048	0.0918	0.1157	0.1088	0.1236	0.1321	0.0877	0.0517	0.543262411	-0.368174727	shadows
-74.91854178	7.607928592	0.0302	0.0307	0.0354	0.0256	0.0462	0.1032	0.1319	0.131	0.138	0.1438	0.0793	0.045	0.673052363	-0.382737576	shadows
-74.95208018	7.660670068	0.0437	0.0394	0.0461	0.0478	0.0578	0.0949	0.1149	0.1034	0.1184	0.1841	0.0867	0.0557	0.367724868	-0.305722892	shadows
-74.96339217	7.913406471	0.0205	0.0239	0.0266	0.0184	0.0355	0.0692	0.0853	0.0794	0.0924	0.1085	0.0596	0.0326	0.623721881	-0.382830626	shadows
-74.96348289	7.913496935	0.0212	0.0236	0.0289	0.0198	0.0358	0.0736	0.0936	0.0841	0.098	0.1177	0.0594	0.0332	0.618864293	-0.345413364	shadows
-74.98661757	7.925348039	0.0249	0.0275	0.038	0.0207	0.0451	0.0978	0.1165	0.1373	0.1241	0.1585	0.0704	0.0356	0.737974684	-0.298892989	shadows
-74.93453754	7.937826011	0.0155	0.0168	0.0164	0.0166	0.0228	0.0337	0.0374	0.0401	0.0452	0.0565	0.0478	0.0345	0.414462081	-0.489096573	shadows
-74.95159759	7.915485755	0.0253	0.0275	0.0283	0.0342	0.0411	0.0583	0.0677	0.0607	0.069	0.0974	0.0663	0.0448	0.279241307	-0.401691332	shadows
-74.95259546	7.916480884	0.0234	0.0249	0.0258	0.029	0.0357	0.0541	0.0669	0.0593	0.0698	0.0799	0.0628	0.0385	0.343148358	-0.417607223	shadows
-74.99859377	7.907890262	0.0649	0.0374	0.0449	0.0348	0.0528	0.1025	0.1288	0.1177	0.1389	0.1599	0.091	0.0532	0.543606557	-0.339220015	shadows
-74.94859471	7.987126324	0.015	0.0165	0.0198	0.0118	0.0237	0.0552	0.0708	0.0666	0.0758	0.0762	0.0415	0.0221	0.698979592	-0.353996737	shadows
-74.9906094	7.934755556	0.0258	0.0298	0.0349	0.0178	0.0353	0.0854	0.1089	0.1184	0.1153	0.1214	0.0588	0.0318	0.738619677	-0.25506937	shadows
-74.98661741	7.930232655	0.0333	0.0365	0.046	0.0368	0.0619	0.1092	0.1314	0.1274	0.1373	0.1635	0.0961	0.0535	0.551766139	-0.352568614	shadows
-74.98552891	7.923177062	0.0241	0.0231	0.0308	0.0201	0.0389	0.0771	0.0987	0.0957	0.1079	0.1311	0.0594	0.0335	0.652849741	-0.317073171	shadows
-74.94706183	7.911143322	0.0211	0.0206	0.0318	0.0156	0.0432	0.1192	0.1541	0.1362	0.1703	0.1803	0.0762	0.0349	0.794466403	-0.411111111	shadows
-74.94859469	7.98721678	0.0152	0.0175	0.0193	0.0115	0.0235	0.0565	0.0725	0.066	0.077	0.0816	0.042	0.0223	0.703225806	-0.370309951	shadows
-74.94741537	7.984683876	0.0206	0.0186	0.0236	0.0138	0.028	0.0581	0.0724	0.0659	0.0709	0.1335	0.0441	0.0242	0.65370138	-0.302806499	shadows
-74.97037866	7.904904168	0.0244	0.0246	0.0274	0.0182	0.0315	0.0767	0.0977	0.0942	0.1001	0.1151	0.0521	0.0301	0.676156584	-0.310691824	shadows
-74.95013489	8.007117183	0.0215	0.0262	0.0419	0.0281	0.0662	0.1373	0.1593	0.1742	0.164	0.1496	0.1068	0.0458	0.72219476	-0.436449227	shadows
-74.98997428	7.935388732	0.0435	0.0237	0.0286	0.0183	0.039	0.0957	0.122	0.1136	0.1315	0.1677	0.0758	0.0497	0.722517058	-0.45210728	shadows
-74.97119507	7.906351521	0.0301	0.0269	0.0314	0.0284	0.0502	0.0846	0.1097	0.0758	0.1121	0.1201	0.0835	0.0554	0.454894434	-0.453437772	shadows
-74.97221809	7.522543585	0.0369	0.0452	0.053	0.0383	0.0649	0.1284	0.1544	0.1485	0.1592	0.2421	0.1027	0.058	0.58993576	-0.319203597	shadows
-74.98952078	7.92932818	0.0411	0.044	0.0599	0.0525	0.0761	0.1268	0.1497	0.1548	0.1543	0.1807	0.1211	0.0663	0.493487699	-0.338121547	shadows
-74.97192095	7.905085187	0.0229	0.0225	0.0226	0.0143	0.0281	0.0674	0.0894	0.081	0.0942	0.1078	0.0482	0.0281	0.699895068	-0.361581921	shadows
-74.974484	7.525257449	0.045	0.0436	0.0517	0.0408	0.0742	0.1466	0.1772	0.1631	0.1906	0.3209	0.1211	0.0682	0.599803825	-0.40162037	shadows
-74.97230871	7.522905421	0.0348	0.0401	0.0471	0.035	0.0592	0.1203	0.1467	0.1385	0.1538	0.2492	0.0931	0.0533	0.596541787	-0.32810271	shadows
-74.94841311	7.988030857	0.0226	0.0229	0.0323	0.0215	0.0582	0.1487	0.1897	0.1302	0.2009	0.1957	0.0979	0.0568	0.716545814	-0.503840246	shadows
-74.98716198	7.923900762	0.0216	0.0215	0.0229	0.0122	0.0305	0.0923	0.1292	0.1121	0.1438	0.2132	0.062	0.033	0.803700724	-0.460541814	shadows
-74.96339216	7.913496927	0.0206	0.0234	0.0293	0.0195	0.0346	0.071	0.0889	0.0856	0.0954	0.1134	0.0579	0.0323	0.628924833	-0.327981651	shadows
-74.95268618	7.916571351	0.023	0.0226	0.0246	0.0247	0.0362	0.0562	0.0681	0.0608	0.0725	0.081	0.063	0.0381	0.422222222	-0.438356164	shadows
-74.99759582	7.905267035	0.0457	0.0404	0.0466	0.0369	0.0595	0.1169	0.1451	0.1319	0.1501	0.1663	0.1033	0.057	0.562796209	-0.378252168	shadows
-74.97185552	7.522543562	0.0368	0.0429	0.0503	0.0389	0.0626	0.1124	0.1354	0.1305	0.1411	0.2325	0.0979	0.0571	0.540731995	-0.321187584	shadows
-74.99106304	7.935479213	0.0224	0.021	0.0268	0.0142	0.036	0.0899	0.1135	0.1096	0.1174	0.1235	0.0601	0.0298	0.770597738	-0.383199079	shadows
-74.94923003	7.986040936	0.0212	0.0271	0.0413	0.0234	0.0644	0.1554	0.19	0.1917	0.2083	0.2238	0.0981	0.0462	0.782426778	-0.407460545	shadows
-74.98670813	7.930684937	0.0377	0.034	0.0387	0.0397	0.0662	0.1067	0.1282	0.1022	0.1341	0.187	0.1052	0.061	0.440451022	-0.462126477	shadows
-74.97935525	8.006215124	0.0256	0.0221	0.0232	0.0175	0.0275	0.0458	0.0572	0.0455	0.0582	0.0662	0.0374	0.0235	0.444444444	-0.234323432	shadows
-74.98688981	7.923629386	0.0194	0.0192	0.0204	0.0119	0.0273	0.0797	0.1069	0.0979	0.1139	0.1339	0.0509	0.0264	0.783242259	-0.427769986	shadows
-74.95226165	7.659584604	0.0288	0.0332	0.0379	0.0333	0.0509	0.0887	0.1077	0.101	0.113	0.1851	0.0767	0.0481	0.504095309	-0.338568935	shadows
-74.97094906	7.523086248	0.0347	0.0404	0.0479	0.0336	0.0569	0.1133	0.137	0.134	0.1445	0.2308	0.0933	0.054	0.599045346	-0.321529745	shadows
-74.93453748	7.938187834	0.015	0.0161	0.0139	0.0174	0.0224	0.0262	0.0339	0.0317	0.038	0.0531	0.0497	0.0379	0.291242363	-0.562893082	shadows
-74.98688979	7.924172122	0.02	0.0199	0.023	0.0128	0.0346	0.1054	0.1451	0.1054	0.1532	0.1535	0.0646	0.0321	0.783417936	-0.474885845	shadows
-74.99814016	7.905990686	0.043	0.0397	0.0454	0.0367	0.0588	0.1168	0.143	0.1344	0.1527	0.1568	0.1007	0.0573	0.571011105	-0.378507871	shadows
-74.95253361	7.660036919	0.0282	0.032	0.0357	0.0291	0.0481	0.086	0.1035	0.0974	0.1094	0.1631	0.0739	0.0463	0.539920949	-0.348540146	shadows
-74.95307757	7.660670177	0.0265	0.0305	0.0334	0.0256	0.0437	0.1015	0.1316	0.123	0.143	0.1467	0.074	0.0417	0.655450875	-0.378026071	shadows
-74.91836041	7.60819993	0.0299	0.0345	0.0373	0.0295	0.0462	0.0973	0.1209	0.1217	0.127	0.1348	0.0852	0.0505	0.60978836	-0.391020408	shadows
-74.98933932	7.929147264	0.0421	0.044	0.0559	0.0484	0.0758	0.1316	0.1559	0.1544	0.1616	0.1945	0.1251	0.0653	0.522682446	-0.382320442	shadows
-74.95271504	7.659222826	0.0285	0.0292	0.037	0.0264	0.0456	0.0904	0.1116	0.1052	0.1159	0.1835	0.07	0.0448	0.598784195	-0.308411215	shadows
-74.97708902	7.96270586	0.0192	0.0177	0.019	0.0123	0.0245	0.0582	0.0756	0.0743	0.0776	0.0774	0.0456	0.0259	0.715935335	-0.411764706	shadows
-74.9649346	7.912321133	0.0241	0.0227	0.0252	0.0183	0.032	0.0726	0.0922	0.0842	0.0948	0.1363	0.0519	0.0276	0.642926829	-0.346303502	shadows
-74.94850384	7.988121324	0.0236	0.0255	0.0412	0.0268	0.0737	0.1815	0.229	0.1809	0.2482	0.2163	0.1221	0.0708	0.741935484	-0.495407226	shadows
-74.97953884	7.96415328	0.0229	0.0203	0.0202	0.0117	0.0235	0.0748	0.1033	0.0887	0.1106	0.1683	0.0479	0.0276	0.766932271	-0.406754772	shadows
-74.97728715	7.654521058	0.0315	0.0294	0.0345	0.0236	0.0423	0.0991	0.127	0.1174	0.1382	0.158	0.0695	0.0371	0.665248227	-0.336538462	shadows
-74.93534626	7.987938566	0.0124	0.0171	0.0162	0.0096	0.0194	0.0516	0.0721	0.0728	0.0724	0.07	0.0362	0.0192	0.766990291	-0.381679389	shadows
-74.9869805	7.924805315	0.0226	0.0208	0.0251	0.015	0.0398	0.1009	0.1352	0.1177	0.1412	0.1545	0.0662	0.0347	0.773926149	-0.450164294	shadows
-74.9986845	7.907528439	0.0494	0.038	0.0445	0.0345	0.0546	0.1033	0.1304	0.1228	0.139	0.1493	0.0966	0.0555	0.561347743	-0.369241673	shadows
-74.99777725	7.906985699	0.0661	0.0357	0.042	0.0326	0.0541	0.1041	0.1302	0.1195	0.1371	0.1661	0.0968	0.0578	0.571334648	-0.39481268	shadows
-74.94795954	7.986945334	0.0147	0.0177	0.018	0.011	0.0223	0.0502	0.0692	0.0629	0.0724	0.0716	0.0374	0.0212	0.702300406	-0.350180505	shadows
-74.97083226	7.905085112	0.0239	0.0249	0.0246	0.0229	0.0303	0.0595	0.0729	0.0605	0.0718	0.1031	0.0518	0.0359	0.450839329	-0.356020942	shadows
-74.94823186	7.986131268	0.0156	0.0175	0.0179	0.0122	0.0195	0.0407	0.0528	0.0453	0.0566	0.0674	0.0311	0.0168	0.575652174	-0.269387755	shadows
-74.99777725	7.907076155	0.0744	0.0385	0.0449	0.0357	0.0559	0.1037	0.1301	0.119	0.137	0.1733	0.1007	0.0622	0.538461538	-0.383241758	shadows
-74.95289638	7.659222846	0.0283	0.0303	0.0351	0.0264	0.0442	0.0909	0.1123	0.1055	0.1158	0.1833	0.0694	0.0436	0.59969674	-0.328229665	shadows
-74.93897562	7.99011005	0.016	0.0163	0.0229	0.0126	0.0391	0.1157	0.1571	0.1284	0.1697	0.2018	0.073	0.0348	0.821276596	-0.522419187	shadows
-74.9469613	7.98748794	0.0187	0.0181	0.0236	0.0142	0.0356	0.0956	0.1197	0.1075	0.1208	0.1377	0.0591	0.0304	0.766639277	-0.429262394	shadows
-74.97781252	8.007119599	0.0224	0.0241	0.0223	0.0194	0.028	0.0396	0.0483	0.0447	0.0505	0.0618	0.0408	0.0282	0.394695788	-0.29318542	shadows
-74.93552766	7.988481327	0.0124	0.0144	0.0162	0.0098	0.0177	0.05	0.0676	0.069	0.0735	0.0666	0.0356	0.0191	0.751269036	-0.374517375	shadows
-74.98707128	7.923177113	0.0224	0.0212	0.0247	0.0142	0.0354	0.1048	0.1458	0.1116	0.1533	0.1992	0.0672	0.0307	0.774244833	-0.462459195	shadows
-74.95159754	7.915847579	0.0276	0.026	0.0274	0.0317	0.042	0.0591	0.069	0.0604	0.0696	0.0923	0.0675	0.0457	0.311617807	-0.422550053	shadows
-74.98924859	7.929237717	0.0401	0.0399	0.0483	0.0406	0.07	0.1166	0.1375	0.1379	0.1453	0.1801	0.1109	0.0614	0.545098039	-0.39321608	shadows
-74.91538074	7.998970531	0.0196	0.02	0.026	0.0144	0.0343	0.0935	0.1301	0.1027	0.1456	0.1803	0.0611	0.0328	0.754056362	-0.402985075	shadows
-74.94706186	7.91096241	0.0205	0.0233	0.0276	0.0162	0.0394	0.106	0.136	0.1284	0.1459	0.1507	0.067	0.0315	0.77593361	-0.416490486	shadows
-74.93543706	7.987576758	0.0141	0.0144	0.0189	0.0129	0.0299	0.0686	0.0934	0.0786	0.0962	0.0819	0.0478	0.0291	0.718032787	-0.433283358	shadows
-74.93948365	7.612454877	0.0336	0.0325	0.0388	0.0268	0.0578	0.1414	0.179	0.1474	0.1983	0.2556	0.1006	0.0513	0.692307692	-0.443328551	shadows
-74.95316846	7.658680134	0.0287	0.0305	0.0351	0.0281	0.0464	0.0891	0.1118	0.0992	0.1183	0.1879	0.0697	0.0431	0.558523174	-0.330152672	shadows
-74.95232316	7.917566324	0.0263	0.03	0.0388	0.0434	0.0631	0.0988	0.1245	0.0947	0.1258	0.1405	0.1079	0.0614	0.371469949	-0.471029312	shadows
-74.9388852	7.987939104	0.016	0.0191	0.0221	0.0138	0.0353	0.1025	0.1356	0.1126	0.1364	0.152	0.0632	0.026	0.78164557	-0.481828839	shadows
-74.95298711	7.658680114	0.0289	0.0308	0.0365	0.0282	0.0455	0.0931	0.1177	0.111	0.1237	0.1877	0.0685	0.0425	0.594827586	-0.304761905	shadows
-74.93480943	7.939725624	0.013	0.0109	0.0131	0.0079	0.0201	0.0603	0.0857	0.0702	0.0903	0.102	0.0434	0.0247	0.797695262	-0.536283186	shadows
-74.95232327	7.916571309	0.025	0.0244	0.0274	0.0262	0.0393	0.061	0.075	0.0678	0.0776	0.084	0.0645	0.0409	0.442553191	-0.403699674	shadows
-74.94769701	7.910329299	0.0239	0.0251	0.0271	0.0169	0.032	0.0762	0.1025	0.0847	0.1117	0.1574	0.0534	0.0294	0.667322835	-0.326708075	shadows
-74.97719648	7.654521053	0.0312	0.0305	0.0345	0.0236	0.042	0.097	0.1252	0.1196	0.1361	0.153	0.0689	0.0373	0.670391061	-0.332688588	shadows
-74.98979281	7.935479183	0.0526	0.0297	0.0397	0.0325	0.0559	0.1248	0.1629	0.1232	0.1784	0.2048	0.1102	0.0816	0.582530507	-0.470313542	shadows
-74.90766868	7.579251495	0.0295	0.0364	0.0505	0.0326	0.07	0.1483	0.1713	0.1591	0.1769	0.2429	0.103	0.055	0.659885237	-0.342019544	shadows
-74.93670735	7.988210143	0.0099	0.0138	0.013	0.0067	0.0147	0.044	0.0636	0.0603	0.0655	0.0579	0.0319	0.0191	0.8	-0.420935412	shadows
-74.94913926	7.986312292	0.0194	0.0189	0.0263	0.0162	0.0446	0.108	0.1378	0.0999	0.1426	0.1505	0.0698	0.0349	0.720930233	-0.452653486	shadows
-74.93535378	7.939997077	0.0185	0.0155	0.0185	0.0117	0.0347	0.1028	0.1383	0.1049	0.1529	0.1729	0.071	0.0368	0.799313894	-0.586592179	shadows
-74.97046936	7.905265999	0.0239	0.0224	0.0263	0.0154	0.0313	0.0685	0.0929	0.0892	0.0918	0.1102	0.0476	0.0301	0.705544933	-0.288227334	shadows
-74.97183017	7.90598974	0.0241	0.0195	0.0224	0.0162	0.0289	0.0707	0.0964	0.0883	0.0988	0.1161	0.048	0.0278	0.689952153	-0.363636364	shadows
-74.9875247	7.930504051	0.0277	0.0291	0.0351	0.0248	0.0492	0.1004	0.1252	0.1344	0.1342	0.1372	0.0812	0.0441	0.688442211	-0.39638865	shadows
-74.99895667	7.90752844	0.0443	0.0389	0.0461	0.0357	0.0544	0.11	0.1399	0.1276	0.1506	0.1519	0.0918	0.0505	0.562767912	-0.331399565	shadows
-74.99904739	7.910694398	0.0401	0.0366	0.04	0.0306	0.0485	0.0931	0.1167	0.1078	0.1224	0.1312	0.0911	0.0534	0.557803468	-0.389778795	shadows
-74.93752399	7.988481634	0.0108	0.0148	0.0128	0.008	0.017	0.0449	0.0638	0.0631	0.0682	0.0652	0.0337	0.019	0.774964838	-0.449462366	shadows
-74.93607235	7.986943668	0.0167	0.0177	0.0191	0.0108	0.0292	0.0798	0.1052	0.1011	0.1135	0.1742	0.0495	0.0265	0.806970509	-0.443148688	shadows
-74.92918984	7.906075145	0.0273	0.0255	0.0305	0.0262	0.0422	0.0675	0.0813	0.0612	0.0866	0.1207	0.0571	0.0285	0.400457666	-0.303652968	shadows
[truncated: 52,431 more rows]
